# Supplementary material for: Oxoammonium salt-promoted diverse functionalization of saturated cyclic amines with dinucleophiles
Source: Royal Society of Chemistry journal article supplement (doi:10.1039/d2cc06936a), 2023-01-01
Supplement: d2cc06936a1.pdf [file d2cc06936a1.pdf]

## Supporting Information

### Oxoammonium salt-promoted diverse functionalization of saturated cyclic amines with dinucleophiles

Yan He,<sup>\*a</sup> Qimeng Liu,<sup>a</sup> Jintao Yang,<sup>a</sup> Yunfei Liu,<sup>b</sup> Xinying Zhang,<sup>a</sup> and Xuesen Fan<sup>\*a</sup>

<sup>a</sup>NMPA Key Laboratory for Research and Evaluation of Innovative Drug, Key Laboratory for Yellow River and Huai River Water Environmental Pollution Control, Ministry of Education, Collaborative Innovation Center of Henan Province for Green Manufacturing of Fine Chemicals, School of Environment, School of Chemistry and Chemical Engineering, Henan Normal University, Xinxiang, Henan 453007, China.

<sup>b</sup>The 22nd Research Institute of China Electronics Technology Group Corporation, Xinxiang, Henan 453003, China.

*E-mail: heyang@htu.cn; xuesen.fan@htu.cn*

### Contents

|             |                                                                                   |       |
|-------------|-----------------------------------------------------------------------------------|-------|
| <b>I</b>    | General experimental information                                                  | 2     |
| <b>II</b>   | Experimental procedures and spectroscopic data                                    | 3-24  |
| <b>III</b>  | Copies of the NMR spectra of <b>3a-3q</b>                                         | 25-43 |
| <b>IV</b>   | Copies of the NMR spectra of <b>5a-5s</b>                                         | 44-67 |
| <b>V</b>    | Copies of the NMR spectra of <b>6a-6f</b>                                         | 68-73 |
| <b>VI</b>   | X-ray crystal structures and data of <b>3a</b>                                    | 74-75 |
| <b>VII</b>  | Copies of <sup>1</sup> H- <sup>1</sup> H NOESY spectra of <b>3m</b> and <b>3n</b> | 76-77 |
| <b>VIII</b> | Details of DFT calculations                                                       | 78-92 |
| <b>IX</b>   | References                                                                        | 93-94 |

## I. General experimental information

TEMPO salts were synthesized with a previously described procedure.<sup>1</sup> *N*-Aryl cyclic amines (**1**) were prepared based on a literature procedure.<sup>2</sup> Melting points were recorded with a micro melting point apparatus and uncorrected. The <sup>1</sup>H NMR spectra were recorded at 400 MHz or 600 MHz, and the <sup>13</sup>C NMR spectra were recorded at 100 MHz or 150 MHz. The <sup>19</sup>F NMR spectra were recorded at 565 MHz or 376 MHz. Chemical shifts were expressed in parts per million ( $\delta$ ), and were reported as s (singlet), d (doublet), t (triplet), dd (doublet of doublet), m (multiplet), br s (broad singlet), etc. The coupling constants *J* were given in Hz. High-resolution mass spectra (HRMS) were performed on a microTOF mass spectrometer. All the reactions were monitored by thin-layer chromatography (TLC) using silica gel plates (silica gel 60 F254 0.25 mm), and components were visualized by observation under UV light (254 and 365 nm).

## II. Experimental procedures and spectroscopic data

### 1. Optimization studies for the formation of 3a<sup>a</sup>

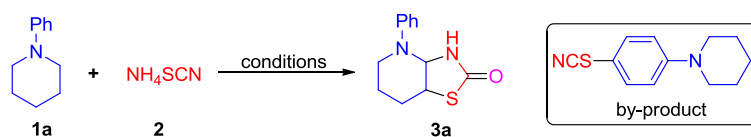

| entry                     | oxoammonium salt (equiv)                         | additive (equiv)                      | solvent                         | yield (%) <sup>b</sup> 3a |
|---------------------------|--------------------------------------------------|---------------------------------------|---------------------------------|---------------------------|
| 1                         | T <sup>+</sup> BF <sub>4</sub> <sup>-</sup> (2)  | -                                     | CH <sub>3</sub> CN              | 20                        |
| 2                         | T <sup>+</sup> BF <sub>4</sub> <sup>-</sup> (2)  | -                                     | THF                             | trace                     |
| 3                         | T <sup>+</sup> BF <sub>4</sub> <sup>-</sup> (2)  | -                                     | DMF                             | trace                     |
| 4                         | T <sup>+</sup> BF <sub>4</sub> <sup>-</sup> (2)  | -                                     | EtOAc                           | trace                     |
| 5                         | T <sup>+</sup> BF <sub>4</sub> <sup>-</sup> (2)  | -                                     | acetone                         | 34                        |
| 6                         | T <sup>+</sup> BF <sub>4</sub> <sup>-</sup> (2)  | -                                     | acetone/H <sub>2</sub> O = 49/1 | 30                        |
| 7                         | T <sup>+</sup> ClO <sub>4</sub> <sup>-</sup> (2) | -                                     | acetone                         | 21                        |
| 8                         | T <sup>+</sup> PF <sub>6</sub> <sup>-</sup> (2)  | -                                     | acetone                         | 24                        |
| 9                         | T <sup>+</sup> OTf <sup>-</sup> (2)              | -                                     | acetone                         | 40                        |
| 10 <sup>c</sup>           | 4-oxo-T <sup>+</sup> OTf <sup>-</sup> (2)        | -                                     | acetone                         | 21                        |
| 11 <sup>d</sup>           | 4-OMe-T <sup>+</sup> OTf <sup>-</sup> (2)        | -                                     | acetone                         | 42                        |
| 12 <sup>e</sup>           | 4-OH-T <sup>+</sup> OTf <sup>-</sup> (2)         | -                                     | acetone                         | 48                        |
| 13 <sup>f</sup>           | 4-NHAc-T <sup>+</sup> OTf <sup>-</sup> (2)       | -                                     | acetone                         | trace                     |
| 14 <sup>e</sup>           | 4-OH-T <sup>+</sup> OTf <sup>-</sup> (3)         | -                                     | acetone                         | 38                        |
| 15 <sup>e</sup>           | 4-OH-T <sup>+</sup> OTf <sup>-</sup> (2)         | HOAc (0.2)                            | acetone                         | trace                     |
| 16 <sup>e</sup>           | 4-OH-T <sup>+</sup> OTf <sup>-</sup> (2)         | TFA (0.2)                             | acetone                         | trace                     |
| 17 <sup>e</sup>           | 4-OH-T <sup>+</sup> OTf <sup>-</sup> (2)         | H <sub>3</sub> BO <sub>3</sub> (0.2)  | acetone                         | 40                        |
| 18 <sup>e</sup>           | 4-OH-T <sup>+</sup> OTf <sup>-</sup> (2)         | K <sub>2</sub> CO <sub>3</sub> (0.2)  | acetone                         | 24                        |
| 19 <sup>e</sup>           | 4-OH-T <sup>+</sup> OTf <sup>-</sup> (2)         | Cs <sub>2</sub> CO <sub>3</sub> (0.2) | acetone                         | 20                        |
| 20 <sup>e</sup>           | 4-OH-T <sup>+</sup> OTf <sup>-</sup> (2)         | DBU (0.2)                             | acetone                         | 26                        |
| 21 <sup>e,g</sup>         | 4-OH-T <sup>+</sup> OTf <sup>-</sup> (2)         | -                                     | acetone                         | 54                        |
| 22 <sup>e,g,h</sup>       | 4-OH-T <sup>+</sup> OTf <sup>-</sup> (2)         | -                                     | acetone                         | 31                        |
| 23 <sup>e,g,i</sup>       | 4-OH-T <sup>+</sup> OTf <sup>-</sup> (2)         | -                                     | acetone                         | 46                        |
| 24 <sup>e,g,j</sup>       | 4-OH-T <sup>+</sup> OTf <sup>-</sup> (2)         | -                                     | acetone                         | 42                        |
| <b>25<sup>e,g,k</sup></b> | <b>4-OH-T<sup>+</sup>OTf<sup>-</sup> (2)</b>     | -                                     | <b>acetone</b>                  | <b>62</b>                 |

<sup>a</sup> Reaction conditions: **1a** (0.2 mmol), **2** (0.4 mmol), solvent (1 mL), rt, air, 6 h. <sup>b</sup> Isolated yield. <sup>c</sup> 4-oxo-T<sup>+</sup> (2,2,6,6-Tetramethyl-1,4-dioxopiperidin-1-ium). <sup>d</sup> 4-OMe-T<sup>+</sup> (4-Methoxy-2,2,6,6-tetramethyl-1-oxopiperidin-1-ium). <sup>e</sup> 4-OH-T<sup>+</sup> (4-Hydroxy-2,2,6,6-tetramethyl-1-oxopiperidin-1-ium). <sup>f</sup> 4-NHAc-T<sup>+</sup> (4-Acetamido-2,2,6,6-tetramethyl-1-oxopiperidin-1-ium). <sup>g</sup> **2** (0.6 mmol). <sup>h</sup> 50 °C. <sup>i</sup> 0 °C. <sup>j</sup> Under O<sub>2</sub>. <sup>k</sup> Under N<sub>2</sub>, by-product 1-(4-thiocyanatophenyl)piperidine was obtained in a yield of 11%.

## 2. Optimization studies for the formation of 5a<sup>a</sup>

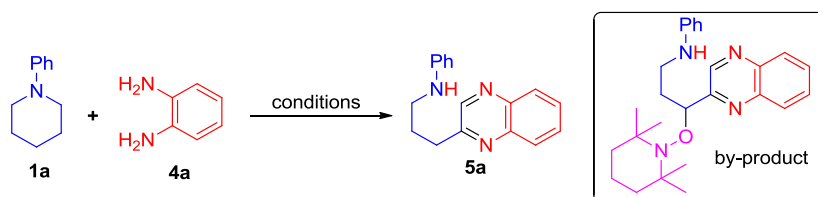

| entry                | oxoammonium salt (equiv)                           | additive (equiv) | solvent            | yield (%) <sup>b</sup> 5a |
|----------------------|----------------------------------------------------|------------------|--------------------|---------------------------|
| 1                    | T <sup>+</sup> ClO <sub>4</sub> <sup>-</sup> (2)   | KSCN (1)         | EtOH               | 40                        |
| 2                    | T <sup>+</sup> ClO <sub>4</sub> <sup>-</sup> (2)   | KSCN (2)         | EtOH               | 35                        |
| 3                    | T <sup>+</sup> ClO <sub>4</sub> <sup>-</sup> (2)   | -                | EtOH               | 20                        |
| 4                    | T <sup>+</sup> ClO <sub>4</sub> <sup>-</sup> (2)   | KSCN (1)         | DMF                | 50                        |
| 5                    | T <sup>+</sup> ClO <sub>4</sub> <sup>-</sup> (2)   | KSCN (1)         | DMSO               | 30                        |
| 6                    | T <sup>+</sup> ClO <sub>4</sub> <sup>-</sup> (2)   | KSCN (1)         | CH <sub>3</sub> CN | 21                        |
| 7                    | T <sup>+</sup> ClO <sub>4</sub> <sup>-</sup> (2)   | KSCN (1)         | THF                | 18                        |
| 8                    | T <sup>+</sup> ClO <sub>4</sub> <sup>-</sup> (2)   | KSCN (1)         | DCM                | 36                        |
| <b>9<sup>c</sup></b> | <b>T<sup>+</sup>BF<sub>4</sub><sup>-</sup> (2)</b> | <b>KSCN (1)</b>  | <b>DMF</b>         | <b>68</b>                 |
| 10                   | T <sup>+</sup> PF <sub>6</sub> <sup>-</sup> (2)    | KSCN (1)         | DMF                | 54                        |
| 11                   | T <sup>+</sup> OTf <sup>-</sup> (2)                | KSCN (1)         | DMF                | 40                        |
| 12                   | T <sup>+</sup> BF <sub>4</sub> <sup>-</sup> (3)    | KSCN (1)         | DMF                | 67                        |
| 13 <sup>d</sup>      | T <sup>+</sup> BF <sub>4</sub> <sup>-</sup> (2)    | KSCN (1)         | DMF                | 31                        |
| 14 <sup>e</sup>      | T <sup>+</sup> BF <sub>4</sub> <sup>-</sup> (2)    | KSCN (1)         | DMF                | 60                        |
| 15 <sup>f</sup>      | T <sup>+</sup> BF <sub>4</sub> <sup>-</sup> (2)    | KSCN (1)         | DMF                | 50                        |
| 16 <sup>g</sup>      | T <sup>+</sup> BF <sub>4</sub> <sup>-</sup> (2)    | KSCN (1)         | DMF                | 62                        |

<sup>a</sup> Reaction conditions: **1a** (0.2 mmol), **4a** (0.4 mmol), solvent (1 mL), rt, air, 6 h. <sup>b</sup> Isolated yield. <sup>c</sup> By-product N-(3-(quinoxalin-2-yl)-3-((2,2,6,6-tetramethylpiperidin-1-yl)oxy)propyl)aniline was obtained in a yield of 7%. <sup>d</sup> **4a** (0.6 mmol). <sup>e</sup> **4a** (0.3 mmol). <sup>f</sup> Under O<sub>2</sub>. <sup>g</sup> Under N<sub>2</sub>.

## 3. A typical procedure for the synthesis of 3a and the spectroscopic data of 3a-3q

To a reaction tube equipped with a stir bar were added 1-(phenyl)piperidine (**1a**, 32 mg, 0.2 mmol), acetone (1 mL), NH<sub>4</sub>SCN (**2**, 46 mg, 0.6 mmol), and 4-OH-T<sup>+</sup>OTf<sup>-</sup> (114 mg, 0.4 mmol). The resulting mixture was then stirred at room temperature under N<sub>2</sub> for 6 h. Upon completion, the mixture was diluted with ethyl acetate (10 mL × 3) and aqueous NaHCO<sub>3</sub> (10 mL, 1 M). The organic layer was dried over anhydrous Na<sub>2</sub>SO<sub>4</sub> and filtered. Then, the solvent was evaporated under vacuum and the crude product was purified by column chromatography on silica-gel with petroleum ether/ethyl acetate (3:1) as the eluent to afford **3a** as yellow solid in 29 mg (62%). **3b-3q** were obtained in an analogous manner.

#### **4-Phenylhexahydrothiazolo[4,5-*b*]pyridin-2(3*H*)-one (3a)**

Eluent: petroleum ether/ethyl acetate (3:1). Yellow solid (29 mg, 62%), mp 134-135 °C. <sup>1</sup>H NMR (600 MHz, CDCl<sub>3</sub>): δ 7.32-7.30 (m, 2H), 6.99-6.96 (m, 3H), 5.68 (d, *J* = 5.4 Hz, 1H), 5.36 (br s, 1H), 3.72-3.68 (m, 1H), 3.38-3.35 (m, 1H), 3.19-3.15 (m, 1H), 2.21-2.18 (m, 1H), 1.98-1.90 (m, 2H), 1.74-1.56 (m, 1H). <sup>13</sup>C{<sup>1</sup>H} NMR (150 MHz, CDCl<sub>3</sub>): δ 172.4, 148.9, 129.8, 121.7, 117.4, 71.6, 44.1, 42.5, 29.5, 23.8. HRMS (ESI) *m/z*: [M+H]<sup>+</sup> Calcd for C<sub>12</sub>H<sub>15</sub>N<sub>2</sub>OS 235.0900; Found 235.0892.

#### **4-(*p*-Tolyl)hexahydrothiazolo[4,5-*b*]pyridin-2(3*H*)-one (3b)**

Eluent: petroleum ether/ethyl acetate (3:1). Yellow solid (34 mg, 68%), mp 131-132 °C. <sup>1</sup>H NMR (600 MHz, CDCl<sub>3</sub>): δ 7.11 (d, *J* = 9.0 Hz, 2H), 6.89 (d, *J* = 8.4 Hz, 2H), 5.60 (d, *J* = 5.4 Hz, 1H), 5.35 (br s, 1H), 3.71-3.67 (m, 1H), 3.30-3.26 (m, 1H), 3.17-3.13 (m, 1H), 2.29 (s, 3H), 2.20-2.17 (m, 1H), 1.95-1.88 (m, 2H), 1.71-1.68 (m, 1H). <sup>13</sup>C{<sup>1</sup>H} NMR (150 MHz, CDCl<sub>3</sub>): δ 172.5, 146.6, 131.5, 130.2, 117.8, 72.1, 44.2, 42.8, 29.5, 23.8, 20.5. HRMS (ESI) *m/z*: [M+H]<sup>+</sup> Calcd for C<sub>13</sub>H<sub>17</sub>N<sub>2</sub>OS 249.1056; Found 249.1047.

#### **4-(4-Ethylphenyl)hexahydrothiazolo[4,5-*b*]pyridin-2(3*H*)-one (3c)**

Eluent: petroleum ether/ethyl acetate (3:1). Yellow liquid (34 mg, 64%). <sup>1</sup>H NMR (600 MHz, CDCl<sub>3</sub>): δ 7.14 (d, *J* = 7.8 Hz, 2H), 6.91 (d, *J* = 7.8 Hz, 2H), 5.62 (s, 1H), 5.36 (br s, 1H), 3.70-3.68 (m, 1H), 3.30-3.28 (m, 1H), 3.17-3.16 (m, 1H), 2.59 (q, *J* = 7.2 Hz, 2H), 2.19-2.17 (m, 1H), 1.94-1.89 (m, 2H), 1.71-1.69 (m, 1H), 1.21 (t, *J* = 7.2 Hz, 3H). <sup>13</sup>C{<sup>1</sup>H} NMR (150 MHz, CDCl<sub>3</sub>): δ 172.5, 146.8, 138.0, 129.0, 117.8, 72.1, 44.2, 42.8, 29.5, 28.0, 23.8, 15.7. HRMS (ESI) *m/z*: [M+H]<sup>+</sup> Calcd for C<sub>14</sub>H<sub>19</sub>N<sub>2</sub>OS 263.1213; Found 263.1211.

#### **4-(4-(*Tert*-butyl)phenyl)hexahydrothiazolo[4,5-*b*]pyridin-2(3*H*)-one (3d)**

Eluent: petroleum ether/ethyl acetate (3:1). Yellow liquid (36 mg, 62%).  $^1\text{H}$  NMR (400 MHz,  $\text{CDCl}_3$ ):  $\delta$  7.34-7.30 (m, 2H), 6.94-6.90 (m, 2H), 5.63 (d,  $J = 5.6$  Hz, 1H), 5.36 (br s, 1H), 3.71-3.66 (m, 1H), 3.34-3.29 (m, 1H), 3.18-3.12 (m, 1H), 2.20-2.16 (m, 1H), 1.98-1.87 (m, 2H), 1.74-1.67 (m, 1H), 1.30 (s, 9H).  $^{13}\text{C}\{^1\text{H}\}$  NMR (100 MHz,  $\text{CDCl}_3$ ):  $\delta$  172.4, 146.4, 144.7, 126.5, 117.2, 71.9, 44.2, 42.6, 34.1, 31.4, 29.5, 23.8. HRMS (ESI)  $m/z$ :  $[\text{M}+\text{H}]^+$  Calcd for  $\text{C}_{16}\text{H}_{23}\text{N}_2\text{OS}$  291.1526; Found 291.1524.

#### **4-(4-Methoxyphenyl)hexahydrothiazolo[4,5-*b*]pyridin-2(3*H*)-one (3e)**

Eluent: petroleum ether/ethyl acetate (2:1). Yellow liquid (38 mg, 71%).  $^1\text{H}$  NMR (600 MHz,  $\text{CDCl}_3$ ):  $\delta$  6.96-6.94 (m, 2H), 6.87-6.85 (m, 2H), 5.45 (d,  $J = 4.8$  Hz, 1H), 5.38 (br s, 1H), 3.78 (s, 3H), 3.73-3.69 (m, 1H), 3.18-3.13 (m, 2H), 2.18-2.15 (m, 1H), 1.96-1.88 (m, 2H), 1.72-1.68 (m, 1H).  $^{13}\text{C}\{^1\text{H}\}$  NMR (150 MHz,  $\text{CDCl}_3$ ):  $\delta$  172.7, 155.3, 142.8, 120.3, 114.9, 73.2, 55.6, 44.3, 43.6, 29.4, 23.9. HRMS (ESI)  $m/z$ :  $[\text{M}+\text{H}]^+$  Calcd for  $\text{C}_{13}\text{H}_{17}\text{N}_2\text{O}_2\text{S}$  265.1005; Found 265.0999.

#### **4-(4-Fluorophenyl)hexahydrothiazolo[4,5-*b*]pyridin-2(3*H*)-one (3f)**

Eluent: petroleum ether/ethyl acetate (3:1). Yellow solid (23 mg, 45%), mp 120-121  $^\circ\text{C}$ .  $^1\text{H}$  NMR (600 MHz,  $\text{CDCl}_3$ ):  $\delta$  7.02-6.94 (m, 4H), 5.56 (br s, 1H), 5.51 (d,  $J = 5.4$  Hz, 1H), 3.72-3.68 (m, 1H), 3.22-3.15 (m, 2H), 2.20-2.15 (m, 1H), 1.96-1.88 (m, 2H), 1.73-1.66 (m, 1H).  $^{13}\text{C}\{^1\text{H}\}$  NMR (150 MHz,  $\text{CDCl}_3$ ):  $\delta$  172.6, 158.2 (d,  $^1J_{\text{C-F}} = 240.9$  Hz), 145.4 (d,  $^4J_{\text{C-F}} = 3.3$  Hz), 119.9 (d,  $^3J_{\text{C-F}} = 8.7$  Hz), 116.2 (d,  $^2J_{\text{C-F}} = 21.9$  Hz), 72.6, 44.2, 43.3, 29.3, 23.7.  $^{19}\text{F}\{^1\text{H}\}$  NMR ( $\text{CDCl}_3$ , 565 MHz):  $\delta$  -121.3. HRMS (ESI)  $m/z$ :  $[\text{M}+\text{H}]^+$  Calcd for  $\text{C}_{12}\text{H}_{14}\text{FN}_2\text{OS}$  253.0805; Found 253.0797.

#### **4-(4-Chlorophenyl)hexahydrothiazolo[4,5-*b*]pyridin-2(3*H*)-one (3g)**

Eluent: petroleum ether/ethyl acetate (3:1). Yellow liquid (27 mg, 50%).  $^1\text{H}$  NMR (600 MHz,  $\text{CDCl}_3$ ):  $\delta$  7.27-7.25 (m, 2H), 6.91-6.89 (m, 2H), 5.62 (d,  $J = 5.4$  Hz, 1H), 5.39 (br s, 1H), 3.71-3.67 (m, 1H), 3.33-3.30 (m, 1H), 3.17-3.13 (m, 1H), 2.20-2.17 (m, 1H), 1.97-1.90 (m, 2H), 1.73-1.68 (m,

1H).  $^{13}\text{C}\{^1\text{H}\}$  NMR (150 MHz,  $\text{CDCl}_3$ ):  $\delta$  172.3, 147.5, 129.7, 126.7, 118.6, 71.4, 44.0, 42.7, 29.3, 23.6. HRMS (ESI)  $m/z$ :  $[\text{M}+\text{H}]^+$  Calcd for  $\text{C}_{12}\text{H}_{14}\text{ClN}_2\text{OS}$  269.0510; Found 269.0501.

#### **4-(4-Bromophenyl)hexahydrothiazolo[4,5-*b*]pyridin-2(3*H*)-one (3h)**

Eluent: petroleum ether/ethyl acetate (3:1). Yellow solid (36 mg, 58%), mp 136-137 °C.  $^1\text{H}$  NMR (600 MHz,  $\text{CDCl}_3$ ):  $\delta$  7.40 (d,  $J = 9.0$  Hz, 2H), 6.85 (d,  $J = 9.0$  Hz, 2H), 5.62 (d,  $J = 5.4$  Hz, 1H), 5.40 (br s, 1H), 3.71-3.67 (m, 1H), 3.34-3.32 (m, 1H), 3.17-3.13 (m, 1H), 2.19-2.17 (m, 1H), 1.97-1.90 (m, 2H), 1.71-1.68 (m, 1H).  $^{13}\text{C}\{^1\text{H}\}$  NMR (150 MHz,  $\text{CDCl}_3$ ):  $\delta$  172.3, 147.9, 132.6, 118.9, 114.0, 71.2, 44.0, 42.5, 29.3, 23.5. HRMS (ESI)  $m/z$ :  $[\text{M}+\text{H}]^+$  Calcd for  $\text{C}_{12}\text{H}_{14}\text{BrN}_2\text{OS}$  313.0005; Found 313.0000.

#### **4-(4-Iodophenyl)hexahydrothiazolo[4,5-*b*]pyridin-2(3*H*)-one (3i)**

Eluent: petroleum ether/ethyl acetate (3:1). Yellow liquid (40 mg, 55%).  $^1\text{H}$  NMR (600 MHz,  $\text{CDCl}_3$ ):  $\delta$  7.59-7.56 (m, 2H), 6.75-6.72 (m, 2H), 5.63 (d,  $J = 5.4$  Hz, 1H), 5.42 (br s, 1H), 3.70-3.66 (m, 1H), 3.36-3.33 (m, 1H), 3.16-3.12 (m, 1H), 2.20-2.17 (m, 1H), 1.96-1.90 (m, 2H), 1.72-1.67 (m, 1H).  $^{13}\text{C}\{^1\text{H}\}$  NMR (100 MHz,  $\text{CDCl}_3$ ):  $\delta$  172.2, 148.5, 138.5, 119.1, 83.7, 70.9, 44.0, 42.3, 29.3, 23.5. HRMS (ESI)  $m/z$ :  $[\text{M}+\text{H}]^+$  Calcd for  $\text{C}_{12}\text{H}_{14}\text{IN}_2\text{OS}$  360.9866; Found 360.9853.

#### **4-(*m*-Tolyl)hexahydrothiazolo[4,5-*b*]pyridin-2(3*H*)-one (3j)**

Eluent: petroleum ether/ethyl acetate (3:1). Yellow liquid (29 mg, 58%).  $^1\text{H}$  NMR (400 MHz,  $\text{CDCl}_3$ ):  $\delta$  7.19 (t,  $J = 8.0$  Hz, 1H), 6.79-6.77 (m, 3H), 5.67 (d,  $J = 4.8$  Hz, 1H), 5.32 (br s, 1H), 3.71-3.66 (m, 1H), 3.38-3.33 (m, 1H), 3.19-3.12 (m, 1H), 2.33 (s, 3H), 2.21-2.17 (m, 1H), 1.98-1.88 (m, 2H), 1.72-1.67 (m, 1H).  $^{13}\text{C}\{^1\text{H}\}$  NMR (150 MHz,  $\text{CDCl}_3$ ):  $\delta$  172.3, 148.9, 139.6, 129.6, 122.6, 118.2, 114.5, 71.7, 44.1, 42.6, 29.6, 23.8, 21.7. HRMS (ESI)  $m/z$ :  $[\text{M}+\text{H}]^+$  Calcd for  $\text{C}_{13}\text{H}_{17}\text{N}_2\text{OS}$  249.1056; Found 249.1043.

#### **4-([1,1'-Biphenyl]-4-yl)hexahydrothiazolo[4,5-*b*]pyridin-2(3*H*)-one (3k)**

Eluent: petroleum ether/ethyl acetate (3:1). Yellow liquid (32 mg, 51%).  $^1\text{H}$  NMR (400 MHz,  $\text{CDCl}_3$ ):  $\delta$  7.58-7.53 (m, 4H), 7.42 (t,  $J = 7.6$  Hz, 2H), 7.32 (t,  $J = 7.2$  Hz, 1H), 7.03 (d,  $J = 8.8$  Hz, 2H), 5.72 (d,  $J = 5.6$  Hz, 1H), 5.48 (br s, 1H), 3.73-3.68 (m, 1H), 3.45-3.41 (m, 1H), 3.23-3.16 (m, 1H), 2.22-2.16 (m, 1H), 2.00-1.91 (m, 2H), 1.77-1.68 (m, 1H).  $^{13}\text{C}\{^1\text{H}\}$  NMR (150 MHz,  $\text{CDCl}_3$ ):  $\delta$  172.3, 148.1, 140.4, 134.4, 128.8, 128.3, 127.0, 126.7, 117.4, 71.3, 44.1, 42.5, 29.5, 23.7. HRMS (ESI)  $m/z$ :  $[\text{M}+\text{H}]^+$  Calcd for  $\text{C}_{18}\text{H}_{19}\text{N}_2\text{OS}$  311.1213; Found 311.1200.

#### **4-Mesitylhexahydrothiazolo[4,5-*b*]pyridin-2(3*H*)-one (3l)**

Eluent: petroleum ether/ethyl acetate (3:1). Yellow liquid (26 mg, 47%).  $^1\text{H}$  NMR (400 MHz,  $\text{CDCl}_3$ ):  $\delta$  6.84 (s, 2H), 5.20 (br s, 1H), 5.00 (d,  $J = 5.2$  Hz, 1H), 3.92-3.88 (m, 1H), 3.34-3.28 (m, 1H), 2.96-2.90 (m, 1H), 2.27 (s, 6H), 2.24 (s, 3H), 2.15-2.04 (m, 2H), 1.96-1.91 (m, 1H), 1.67-1.64 (m, 1H).  $^{13}\text{C}\{^1\text{H}\}$  NMR (150 MHz,  $\text{CDCl}_3$ ):  $\delta$  174.1, 142.8, 137.4, 136.0, 135.9, 130.1, 130.0, 72.5, 46.5, 44.8, 28.6, 24.2, 20.7, 19.3, 19.2. HRMS (ESI)  $m/z$ :  $[\text{M}+\text{H}]^+$  Calcd for  $\text{C}_{15}\text{H}_{21}\text{N}_2\text{OS}$  277.1369; Found 277.1364.

#### **7-Methyl-4-phenylhexahydrothiazolo[4,5-*b*]pyridin-2(3*H*)-one (3m)**

Eluent: petroleum ether/ethyl acetate (3:1). Yellow liquid (26 mg, 52%).  $^1\text{H}$  NMR (400 MHz,  $\text{CDCl}_3$ ):  $\delta$  7.33-7.29 (m, 2H), 6.99-6.94 (m, 3H), 5.75 (d,  $J = 5.2$  Hz, 1H), 5.34 (br s, 1H), 3.42-3.38 (m, 1H), 3.23-3.14 (m, 2H), 2.00-1.85 (m, 2H), 1.51-1.40 (m, 1H), 1.11 (d,  $J = 6.4$  Hz, 3H).  $^{13}\text{C}\{^1\text{H}\}$  NMR (100 MHz,  $\text{CDCl}_3$ ):  $\delta$  172.4, 148.7, 129.8, 121.6, 117.2, 72.1, 52.3, 42.9, 35.1, 32.5, 20.0. HRMS (ESI)  $m/z$ :  $[\text{M}+\text{H}]^+$  Calcd for  $\text{C}_{13}\text{H}_{17}\text{N}_2\text{OS}$  249.1056; Found 249.1051.

#### **4-(4-Methoxyphenyl)-7-methylhexahydrothiazolo[4,5-*b*]pyridin-2(3*H*)-one (3n)**

Eluent: petroleum ether/ethyl acetate (3:1). Brown liquid (31 mg, 56%).  $^1\text{H}$  NMR (600 MHz,  $\text{CDCl}_3$ ):  $\delta$  6.94 (d,  $J = 9.0$  Hz, 2H), 6.86 (d,  $J = 8.4$  Hz, 2H), 5.58 (d,  $J = 4.8$  Hz, 1H), 5.35 (br s, 1H), 3.80-3.77 (m, 3H), 3.21-3.15 (m, 3H), 1.95-1.91 (m, 1H), 1.87-1.85 (m, 1H), 1.47-1.44 (m,



1H), 1.10 (d,  $J = 6.6$  Hz, 3H).  $^{13}\text{C}\{^1\text{H}\}$  NMR (150 MHz,  $\text{CDCl}_3$ ):  $\delta$  172.6, 155.1, 142.6, 119.8, 115.0, 73.7, 55.6, 52.4, 43.5, 35.1, 32.6, 20.0. HRMS (ESI)  $m/z$ :  $[\text{M}+\text{H}]^+$  Calcd for  $\text{C}_{14}\text{H}_{19}\text{N}_2\text{O}_2\text{S}$  279.1162; Found 279.1150.

#### **4-(4-Fluoro phenyl)hexahydro-2H-pyrrolo[2,3-d]thiazol-2-one (3o)**

Eluent: petroleum ether/ethyl acetate (3:1). Yellow liquid (16 mg, 33%).  $^1\text{H}$  NMR (400 MHz,  $\text{CDCl}_3$ ):  $\delta$  7.02-6.97 (m, 2H), 6.60-6.57 (m, 2H), 6.34 (br s, 1H), 5.66 (d,  $J = 7.2$  Hz, 1H), 4.48-4.43 (m, 1H), 3.63-3.57 (m, 1H), 3.44-3.39 (m, 1H), 2.55-2.50 (m, 1H), 2.30-2.25 (m, 1H).  $^{13}\text{C}\{^1\text{H}\}$  NMR (150 MHz,  $\text{CDCl}_3$ ):  $\delta$  172.7, 156.4 (d,  $^1J_{\text{C-F}} = 236.3$  Hz), 141.5 (d,  $^4J_{\text{C-F}} = 2.3$  Hz), 116.4 (d,  $^2J_{\text{C-F}} = 23.0$  Hz), 114.1 (d,  $^3J_{\text{C-F}} = 6.5$  Hz), 72.9, 46.9, 45.8, 33.1.  $^{19}\text{F}\{^1\text{H}\}$  NMR ( $\text{CDCl}_3$ , 376 MHz):  $\delta$  -128.1. HRMS (ESI)  $m/z$ :  $[\text{M}+\text{H}]^+$  Calcd for  $\text{C}_{11}\text{H}_{12}\text{FN}_2\text{OS}$  239.0649; Found 239.0657.

#### **4-(4-Chlorophenyl)hexahydro-2H-pyrrolo[2,3-d]thiazol-2-one (3p)**

Eluent: petroleum ether/ethyl acetate (3:1). White solid (21 mg, 41%), mp 118-119 °C.  $^1\text{H}$  NMR (400 MHz,  $\text{CDCl}_3$ ):  $\delta$  7.25-7.22 (m, 2H), 6.56 (dd,  $J_1 = 6.8$  Hz,  $J_2 = 2.4$  Hz, 2H), 6.31 (br s, 1H), 5.65 (d,  $J = 7.2$  Hz, 1H), 4.49-4.44 (m, 1H), 3.65-3.59 (m, 1H), 3.47-3.42 (m, 1H), 2.55-2.50 (m, 1H), 2.31-2.26 (m, 1H).  $^{13}\text{C}\{^1\text{H}\}$  NMR (150 MHz,  $\text{CDCl}_3$ ):  $\delta$  172.5, 143.5, 129.7, 123.7, 114.1, 72.4, 46.9, 45.7, 32.8. HRMS (ESI)  $m/z$ :  $[\text{M}+\text{H}]^+$  Calcd for  $\text{C}_{11}\text{H}_{12}\text{ClN}_2\text{OS}$  255.0353; Found 255.0347.

#### **4-(2-Oxohexahydro-4H-pyrrolo[2,3-d]thiazol-4-yl)benzotrile (3q)**

Eluent: petroleum ether/ethyl acetate (3:1). White solid (15 mg, 30%), mp 200-201 °C.  $^1\text{H}$  NMR (400 MHz, acetone- $d_6$ ):  $\delta$  8.08 (br s, 1H), 7.57-7.54 (m, 2H), 6.91-6.87 (m, 2H), 5.83 (dd,  $J_1 = 6.8$  Hz,  $J_2 = 1.2$  Hz, 1H), 4.74-4.69 (m, 1H), 3.81-3.75 (m, 1H), 3.67-3.61 (m, 1H), 2.62-2.55 (m, 1H), 2.33-2.28 (m, 1H).  $^{13}\text{C}\{^1\text{H}\}$  NMR (150 MHz, acetone- $d_6$ ):  $\delta$  171.3, 148.5, 133.3, 119.6, 113.2, 99.3,

72.4, 47.4, 46.1, 31.5. HRMS (ESI)  $m/z$ :  $[M+H]^+$  Calcd for  $C_{12}H_{12}N_3OS$  246.0696; Found 246.0696.

#### 4. A typical procedure for the synthesis of **5a** and the spectroscopic data of **5a-5s**

To a reaction tube equipped with a stir bar were added 1-(phenyl)piperidine (**1a**, 32 mg, 0.2 mmol), DMF (1 mL),  $T^+BF_4^-$  (97 mg, 0.4 mmol), *o*-phenylenediamine (**4a**, 43 mg, 0.4 mmol), and KSCN (19 mg, 0.2 mmol). The resulting mixture was then stirred at room temperature under air for 6 h. Upon completion, the mixture was diluted with ethyl acetate and aqueous NaCl. The organic layer was dried over anhydrous  $Na_2SO_4$  and filtered. Then, the solvent was evaporated under vacuum and the crude product was purified by column chromatography on silica-gel with petroleum ether/ethyl acetate (2:1) as the eluent to afford **5a** as brown solid in 36 mg (68%). **5b-5s** were obtained in an analogous manner.

##### ***N*-(3-(Quinoxalin-2-yl)propyl)aniline (5a)**

Eluent: petroleum ether/ethyl acetate (2:1). Brown solid (36 mg, 68%), mp 78-79 °C.  $^1H$  NMR (400 MHz,  $CDCl_3$ ):  $\delta$  8.75 (s, 1H), 8.10-8.04 (m, 2H), 7.76-7.71 (m, 2H), 7.18-7.14 (m, 2H), 6.69 (t,  $J = 7.6$  Hz, 1H), 6.61 (d,  $J = 7.6$  Hz, 2H), 3.88 (br s, 1H), 3.28 (t,  $J = 6.8$  Hz, 2H), 3.15 (t,  $J = 7.6$  Hz, 2H), 2.24-2.20 (m, 2H).  $^{13}C\{^1H\}$  NMR (150 MHz,  $CDCl_3$ ):  $\delta$  156.7, 148.2, 145.8, 142.2, 141.3, 130.1, 129.3, 129.2, 129.1, 128.9, 117.4, 112.8, 43.4, 33.8, 28.6. HRMS (ESI)  $m/z$ :  $[M+H]^+$  Calcd for  $C_{17}H_{18}N_3$  264.1495; Found 264.1486.

##### **4-Methyl-*N*-(3-(quinoxalin-2-yl)propyl)aniline (5b)**

Eluent: petroleum ether/ethyl acetate (2:1). Brown solid (33 mg, 60%), mp 107-108 °C.  $^1H$  NMR (400 MHz,  $CDCl_3$ ):  $\delta$  8.74 (s, 1H), 8.09-8.03 (m, 2H), 7.77-7.69 (m, 2H), 6.97 (d,  $J = 8.0$  Hz, 2H), 6.54 (d,  $J = 8.4$  Hz, 2H), 3.70 (br s, 1H), 3.25 (t,  $J = 7.2$  Hz, 2H), 3.14 (t,  $J = 7.6$  Hz, 2H), 2.23-2.16 (m, 5H).  $^{13}C\{^1H\}$  NMR (150 MHz,  $CDCl_3$ ):  $\delta$  156.8, 145.9, 145.8, 142.2, 141.3, 130.1, 129.8,

129.3, 129.1, 128.9, 126.7, 113.1, 43.8, 33.8, 28.7, 20.4. HRMS (ESI)  $m/z$ :  $[M+H]^+$  Calcd for  $C_{18}H_{20}N_3$  278.1652; Found 278.1641.

#### **4-Fluoro-*N*-(3-(quinoxalin-2-yl)propyl)aniline (5c)**

Eluent: petroleum ether/ethyl acetate (2:1). Brown liquid (42 mg, 74%).  $^1H$  NMR (400 MHz,  $CDCl_3$ ):  $\delta$  8.74 (d,  $J = 5.2$  Hz, 1H), 8.10-8.03 (m, 2H), 7.78-7.70 (m, 2H), 6.90-6.84 (m, 2H), 6.56-6.51 (m, 2H), 3.78 (br s, 1H), 3.23 (t,  $J = 6.8$  Hz, 2H), 3.15 (t,  $J = 7.2$  Hz, 2H), 2.24-2.17 (m, 2H).  $^{13}C\{^1H\}$  NMR (100 MHz,  $CDCl_3$ ):  $\delta$  156.6, 155.8 (d,  $^1J_{C-F} = 233.3$  Hz), 145.9, 144.5 (d,  $^4J_{C-F} = 2.1$  Hz), 142.2, 141.3, 130.1, 129.2 (d,  $^3J_{C-F} = 9.4$  Hz), 128.9, 115.7 (d,  $^2J_{C-F} = 22.3$  Hz), 113.6, 113.5, 44.1, 33.7, 28.5.  $^{19}F\{^1H\}$  NMR ( $CDCl_3$ , 376 MHz):  $\delta$  -128.2. HRMS (ESI)  $m/z$ :  $[M+H]^+$  Calcd for  $C_{17}H_{17}FN_3$  282.1401; Found 282.1392.

#### **4-Chloro-*N*-(3-(quinoxalin-2-yl)propyl)aniline (5d)**

Eluent: petroleum ether/ethyl acetate (2:1). Yellow liquid (39 mg, 65%).  $^1H$  NMR (400 MHz,  $CDCl_3$ ):  $\delta$  8.75 (s, 1H), 8.10-8.03 (m, 2H), 7.77-7.72 (m, 2H), 7.10 (dd,  $J_1 = 6.8$  Hz,  $J_2 = 2.0$  Hz, 2H), 6.52 (dd,  $J_1 = 6.8$  Hz,  $J_2 = 2.0$  Hz, 2H), 3.99 (br s, 1H), 3.24 (t,  $J = 7.2$  Hz, 2H), 3.14 (t,  $J = 7.6$  Hz, 2H), 2.23-2.19 (m, 2H).  $^{13}C\{^1H\}$  NMR (150 MHz,  $CDCl_3$ ):  $\delta$  156.5, 146.6, 145.8, 142.1, 141.3, 130.2, 129.3, 129.2, 129.1, 128.8, 122.0, 113.9, 43.6, 33.6, 28.3. HRMS (ESI)  $m/z$ :  $[M+H]^+$  Calcd for  $C_{17}H_{17}ClN_3$  298.1106; Found 298.1091.

#### **4-Bromo-*N*-(3-(quinoxalin-2-yl)propyl)aniline (5e)**

Eluent: petroleum ether/ethyl acetate (2:1). Brown liquid (49 mg, 72%).  $^1H$  NMR (400 MHz,  $CDCl_3$ ):  $\delta$  8.74 (s, 1H), 8.09-8.03 (m, 2H), 7.78-7.70 (m, 2H), 7.24-7.21 (m, 2H), 6.47 (dd,  $J_1 = 7.2$  Hz,  $J_2 = 2.0$  Hz, 2H), 3.92 (br s, 1H), 3.23 (t,  $J = 6.8$  Hz, 2H), 3.13 (t,  $J = 7.6$  Hz, 2H), 2.23-2.18 (m, 2H).  $^{13}C\{^1H\}$  NMR (150 MHz,  $CDCl_3$ ):  $\delta$  156.5, 147.2, 145.8, 142.1, 141.3, 132.0, 130.2, 129.3,

129.2, 128.9, 114.3, 108.9, 43.4, 33.7, 28.3. HRMS (ESI)  $m/z$ :  $[M+H]^+$  Calcd for  $C_{17}H_{17}BrN_3$  342.0600; Found 342.0576.

### **3-Methyl-N-(3-(quinoxalin-2-yl)propyl)aniline (5f)**

Eluent: petroleum ether/ethyl acetate (2:1). Yellow liquid (31 mg, 56%).  $^1H$  NMR (400 MHz,  $CDCl_3$ ):  $\delta$  8.75 (s, 1H), 8.10-8.04 (m, 2H), 7.76-7.71 (m, 2H), 7.07-7.03 (m, 1H), 6.52 (d,  $J = 7.6$  Hz, 1H), 6.44-6.42 (m, 2H), 3.76 (br s, 1H), 3.27 (t,  $J = 6.8$  Hz, 2H), 3.14 (t,  $J = 7.6$  Hz, 2H), 2.26-2.19 (m, 5H).  $^{13}C\{^1H\}$  NMR (150 MHz,  $CDCl_3$ ):  $\delta$  156.7, 148.2, 145.8, 142.2, 141.3, 139.1, 130.1, 129.2, 129.15, 129.1, 128.9, 118.3, 113.6, 110.0, 43.4, 33.8, 28.7, 21.6. HRMS (ESI)  $m/z$ :  $[M+H]^+$  Calcd for  $C_{18}H_{20}N_3$  278.1652; Found 278.1637.

### **3-Bromo-N-(3-(quinoxalin-2-yl)propyl)aniline (5g)**

Eluent: petroleum ether/ethyl acetate (2:1). Yellow liquid (42 mg, 61%).  $^1H$  NMR (400 MHz,  $CDCl_3$ ):  $\delta$  8.68 (s, 1H), 8.03-7.98 (m, 2H), 7.72-7.64 (m, 2H), 6.93 (t,  $J = 8.0$  Hz, 1H), 6.75 (t,  $J = 0.8$  Hz, 1H), 6.73-6.69 (m, 1H), 6.47 (dd,  $J_1 = 8.0$  Hz,  $J_2 = 1.6$  Hz, 1H), 3.19 (t,  $J = 6.8$  Hz, 2H), 3.08 (t,  $J = 7.6$  Hz, 2H), 2.19-2.11 (m, 2H).  $^{13}C\{^1H\}$  NMR (150 MHz,  $CDCl_3$ ):  $\delta$  156.4, 149.2, 145.8, 142.1, 141.4, 130.5, 130.2, 129.3, 129.2, 128.8, 123.4, 120.3, 115.4, 111.8, 43.4, 33.6, 28.1. HRMS (ESI)  $m/z$ :  $[M+H]^+$  Calcd for  $C_{17}H_{17}BrN_3$  342.0600; Found 342.0580.

### **2-Fluoro-N-(3-(quinoxalin-2-yl)propyl)aniline (5h)**

Eluent: petroleum ether/ethyl acetate (2:1). Yellow solid (37 mg, 66%), mp 88-89 °C.  $^1H$  NMR (400 MHz,  $CDCl_3$ ):  $\delta$  8.75 (s, 1H), 8.10-8.05 (m, 2H), 7.78-7.70 (m, 2H), 7.00-6.92 (m, 2H), 6.73-6.84 (m, 1H), 6.63-6.59 (m, 1H), 4.14 (br s, 1H), 3.32 (t,  $J = 6.8$  Hz, 2H), 3.17 (t,  $J = 7.2$  Hz, 2H), 2.29-2.22 (m, 2H).  $^{13}C\{^1H\}$  NMR (150 MHz,  $CDCl_3$ ):  $\delta$  156.5, 151.6 (d,  $^1J_{C-F} = 237.3$  Hz), 145.8, 142.2, 141.3, 136.7 (d,  $^2J_{C-F} = 12.0$  Hz), 130.1, 129.2 (d,  $^3J_{C-F} = 7.7$  Hz), 128.9, 124.6 (d,  $^4J_{C-F} = 3.3$  Hz), 116.5 (d,  $^3J_{C-F} = 6.6$  Hz), 114.4 (d,  $^2J_{C-F} = 18.6$  Hz), 112.0, 111.9, 43.1, 33.6, 28.4.

$^{19}\text{F}\{^1\text{H}\}$  NMR ( $\text{CDCl}_3$ , 376 MHz):  $\delta$  -136.6. HRMS (ESI)  $m/z$ :  $[\text{M}+\text{H}]^+$  Calcd for  $\text{C}_{17}\text{H}_{17}\text{FN}_3$  282.1401; Found 282.1395.

### **2-Chloro-*N*-(3-(quinoxalin-2-yl)propyl)aniline (5i)**

Eluent: petroleum ether/ethyl acetate (2:1). Yellow liquid (36 mg, 60%).  $^1\text{H}$  NMR (400 MHz,  $\text{CDCl}_3$ ):  $\delta$  8.72 (s, 1H), 8.09-8.03 (m, 2H), 7.75-7.67 (m, 2H), 7.23-7.20 (m, 1H), 7.11 (d,  $J = 7.2$  Hz, 1H), 6.66 (dd,  $J_1 = 8.4$  Hz,  $J_2 = 1.2$  Hz, 1H), 6.61-6.57 (m, 1H), 4.45 (br s, 1H), 3.31 (t,  $J = 6.8$  Hz, 2H), 3.13 (t,  $J = 7.6$  Hz, 2H), 2.28-2.21 (m, 2H).  $^{13}\text{C}\{^1\text{H}\}$  NMR (150 MHz,  $\text{CDCl}_3$ ):  $\delta$  156.4, 145.8, 143.9, 142.2, 141.4, 130.1, 129.3, 129.2, 129.1, 128.9, 127.8, 110.1, 117.2, 111.2, 43.1, 33.6, 28.1. HRMS (ESI)  $m/z$ :  $[\text{M}+\text{H}]^+$  Calcd for  $\text{C}_{17}\text{H}_{17}\text{ClN}_3$  298.1106; Found 298.1086.

### **2-Bromo-*N*-(3-(quinoxalin-2-yl)propyl)aniline (5j)**

Eluent: petroleum ether/ethyl acetate (2:1). Yellow liquid (34 mg, 50%).  $^1\text{H}$  NMR (600 MHz,  $\text{CDCl}_3$ ):  $\delta$  8.76 (s, 1H), 8.09-8.05 (m, 2H), 7.77-7.71 (m, 2H), 7.40 (dd,  $J_1 = 7.8$  Hz,  $J_2 = 1.2$  Hz, 1H), 7.18-7.15 (m, 1H), 6.66 (dd,  $J_1 = 7.8$  Hz,  $J_2 = 0.6$  Hz, 1H), 6.57-6.54 (m, 1H), 4.44 (br s, 1H), 3.35-3.32 (m, 2H), 3.17 (t,  $J = 7.2$  Hz, 2H), 2.31-2.25 (m, 2H).  $^{13}\text{C}\{^1\text{H}\}$  NMR (150 MHz,  $\text{CDCl}_3$ ):  $\delta$  156.4, 145.8, 144.8, 142.2, 141.3, 132.4, 130.1, 129.2, 129.1, 128.9, 128.5, 117.7, 111.3, 109.7, 43.2, 33.6, 28.1. HRMS (ESI)  $m/z$ :  $[\text{M}+\text{H}]^+$  Calcd for  $\text{C}_{17}\text{H}_{17}\text{BrN}_3$  342.0600; Found 342.0576.

### **2-Methyl-*N*-(3-(quinoxalin-2-yl)propyl)aniline (5k)**

Eluent: petroleum ether/ethyl acetate (2:1). Brown solid (30 mg, 54%), mp 63-64 °C.  $^1\text{H}$  NMR (400 MHz,  $\text{CDCl}_3$ ):  $\delta$  8.75 (s, 1H), 8.09-8.04 (m, 2H), 7.77-7.69 (m, 2H), 7.13-7.09 (m, 1H), 7.03 (d,  $J = 7.2$  Hz, 1H), 6.66-6.62 (m, 2H), 3.65 (br s, 1H), 3.32 (t,  $J = 6.8$  Hz, 2H), 3.17 (t,  $J = 6.8$  Hz, 2H), 2.31-2.23 (m, 2H), 2.09 (s, 3H).  $^{13}\text{C}\{^1\text{H}\}$  NMR (150 MHz,  $\text{CDCl}_3$ ):  $\delta$  156.8, 146.1, 145.9, 142.2, 141.4, 130.2, 130.1, 129.3, 129.2, 128.9, 127.2, 122.0, 117.0, 109.7, 43.4, 33.9, 28.5, 17.6. HRMS (ESI)  $m/z$ :  $[\text{M}+\text{H}]^+$  Calcd for  $\text{C}_{18}\text{H}_{20}\text{N}_3$  278.1652; Found 278.1644.

***N*-(3-(Quinoxalin-2-yl)propyl)naphthalen-1-amine (5l)**

Eluent: petroleum ether/ethyl acetate (2:1). Yellow liquid (30 mg, 48%). <sup>1</sup>H NMR (600 MHz, CDCl<sub>3</sub>): δ 8.78 (s, 1H), 8.09 (d, *J* = 8.4 Hz, 2H), 7.79-7.72 (m, 4H), 7.42 (t, *J* = 7.8 Hz, 1H), 7.37-7.32 (m, 2H), 7.22 (d, *J* = 8.4 Hz, 1H), 6.63 (d, *J* = 7.8 Hz, 1H), 4.64 (br s, 1H), 3.45 (t, *J* = 7.2 Hz, 2H), 3.25 (t, *J* = 7.2 Hz, 2H), 2.40-2.38 (m, 2H). <sup>13</sup>C{<sup>1</sup>H} NMR (150 MHz, CDCl<sub>3</sub>): δ 156.8, 145.9, 143.3, 142.2, 141.4, 134.3, 130.1, 129.3, 129.2, 128.9, 128.6, 126.6, 125.7, 124.6, 123.4, 119.9, 117.3, 104.2, 43.8, 34.0, 28.0. HRMS (ESI) *m/z*: [M+H]<sup>+</sup> Calcd for C<sub>21</sub>H<sub>20</sub>N<sub>3</sub> 314.1652, Found 314.1647.

***N*-(3-(Quinoxalin-2-yl)propyl)-[1,1'-biphenyl]-4-amine (5m)**

Eluent: petroleum ether/ethyl acetate (2:1). Brown solid (38 mg, 56%), mp 97-98 °C. <sup>1</sup>H NMR (400 MHz, CDCl<sub>3</sub>): δ 8.75 (s, 1H), 8.10-8.04 (m, 2H), 7.78-7.69 (m, 2H), 7.54-7.51 (m, 2H), 7.42 (d, *J* = 8.4 Hz, 2H), 7.38 (t, *J* = 8.0 Hz, 2H), 7.24-7.22 (m, 1H), 6.68 (d, *J* = 8.4 Hz, 2H), 3.92 (br s, 1H), 3.32 (t, *J* = 7.2 Hz, 2H), 3.16 (t, *J* = 7.6 Hz, 2H), 2.27-2.20 (m, 2H). <sup>13</sup>C{<sup>1</sup>H} NMR (150 MHz, CDCl<sub>3</sub>): δ 156.7, 147.6, 145.9, 142.2, 141.4, 141.3, 130.3, 130.2, 129.3, 129.2, 128.9, 128.7, 128.0, 126.3, 126.1, 113.1, 43.5, 33.8, 28.6. HRMS (ESI) *m/z*: [M+H]<sup>+</sup> Calcd for C<sub>23</sub>H<sub>22</sub>N<sub>3</sub> 340.1808; Found 340.1796.

***N*-(3-(Quinoxalin-2-yl)butyl)aniline (5n)**

Eluent: petroleum ether/ethyl acetate (2:1). Brown solid (35 mg, 63%), mp 79-80 °C. <sup>1</sup>H NMR (400 MHz, CDCl<sub>3</sub>): δ 8.75 (s, 1H), 8.07 (t, *J* = 8.0 Hz, 2H), 7.77-7.70 (m, 2H), 7.13 (t, *J* = 8.0 Hz, 2H), 6.66 (t, *J* = 7.2 Hz, 1H), 6.54 (d, *J* = 7.6 Hz, 2H), 3.66 (br s, 1H), 3.35-3.30 (m, 1H), 3.16-3.13 (m, 2H), 2.32-2.27 (m, 1H), 2.09-2.04 (m, 1H), 1.46 (d, *J* = 6.8 Hz, 3H). <sup>13</sup>C{<sup>1</sup>H} NMR (150 MHz, CDCl<sub>3</sub>): δ 160.6, 148.2, 145.3, 142.3, 141.6, 130.2, 129.4, 129.34, 129.3, 129.2, 117.5, 113.0, 42.2, 38.3, 36.0, 21.0. HRMS (ESI) *m/z*: [M+H]<sup>+</sup> Calcd for C<sub>18</sub>H<sub>20</sub>N<sub>3</sub> 278.1652; Found 278.1643.

#### **4-Fluoro-*N*-(3-(quinoxalin-2-yl)butyl)aniline (5o)**

Eluent: petroleum ether/ethyl acetate (2:1). Brown solid (38 mg, 64%), mp 67-68 °C. <sup>1</sup>H NMR (400 MHz, CDCl<sub>3</sub>): δ 8.75 (s, 1H), 8.09-8.04 (m, 2H), 7.77-7.69 (m, 2H), 6.83 (t, *J* = 8.4 Hz, 2H), 6.47-6.44 (m, 2H), 3.57 (br s, 1H), 3.34-3.29 (m, 1H), 3.11-3.07 (m, 2H), 2.31-2.26 (m, 1H), 2.07-2.02 (m, 1H), 1.46 (d, *J* = 6.8 Hz, 3H). <sup>13</sup>C{<sup>1</sup>H} NMR (150 MHz, CDCl<sub>3</sub>): δ 160.4, 155.8 (d, <sup>1</sup>*J*<sub>C-F</sub> = 233.0 Hz), 145.1, 144.5, 142.1, 141.5, 130.0, 129.2 (d, <sup>4</sup>*J*<sub>C-F</sub> = 3.2 Hz), 129.0, 115.6 (d, <sup>2</sup>*J*<sub>C-F</sub> = 21.8 Hz), 113.6 (d, <sup>3</sup>*J*<sub>C-F</sub> = 7.7 Hz), 42.7, 38.2, 35.7, 20.8. <sup>19</sup>F{<sup>1</sup>H} NMR (CDCl<sub>3</sub>, 376 MHz): δ -128.2. HRMS (ESI) *m/z*: [M+H]<sup>+</sup> Calcd for C<sub>18</sub>H<sub>19</sub>FN<sub>3</sub> 296.1558; Found 296.1547.

#### **4-Methyl-*N*-(4-(quinoxalin-2-yl)butan-2-yl)aniline (5p)**

Eluent: petroleum ether/ethyl acetate (2:1). Yellow liquid (32 mg, 54%). <sup>1</sup>H NMR (600 MHz, CDCl<sub>3</sub>): δ 8.72 (s, 1H), 8.09-8.03 (m, 2H), 7.76-7.70 (m, 2H), 6.96 (d, *J* = 8.4 Hz, 2H), 6.51 (d, *J* = 8.4 Hz, 2H), 3.62-3.58 (m, 1H), 3.16-3.12 (m, 2H), 2.22 (s, 3H), 2.11-2.05 (m, 2H), 1.26 (d, *J* = 6.6 Hz, 3H). <sup>13</sup>C{<sup>1</sup>H} NMR (150 MHz, CDCl<sub>3</sub>): δ 157.2, 145.9, 145.1, 142.2, 141.2, 130.0, 129.8, 129.2, 129.1, 128.8, 126.4, 113.5, 48.7, 36.3, 33.1, 21.1, 20.4. HRMS (ESI) *m/z*: [M+Na]<sup>+</sup> Calcd for C<sub>19</sub>H<sub>21</sub>N<sub>3</sub>Na 314.1628; Found 314.1628.

#### ***N*-(3-(8-Methylquinoxalin-2-yl)propyl)aniline/*N*-(3-(5-methylquinoxalin-2-yl)propyl)aniline (5q/5q')**

Eluent: petroleum ether/ethyl acetate (2:1). Yellow liquid (34 mg, 61%, regio-isomers: 4/1). <sup>1</sup>H NMR (400 MHz, CDCl<sub>3</sub>): δ 8.74 (s, 0.2H), 8.71 (s, 0.8H), 7.92-7.90 (m, 1H), 7.64-7.56 (m, 2H), 7.18-7.14 (m, 2H), 6.71-6.67 (m, 1H), 6.61 (dd, *J*<sub>1</sub> = 8.4 Hz, *J*<sub>2</sub> = 0.8 Hz, 2H), 3.92 (br s, 1H), 3.30-3.25 (m, 2H), 3.17-3.12 (m, 2H), 2.79 (s, 3H), 2.27-2.18 (m, 2H). <sup>13</sup>C{<sup>1</sup>H} NMR (150 MHz, CDCl<sub>3</sub>): δ 155.3, 148.3, 145.3, 144.4, 141.3, 141.2, 137.2, 130.0, 129.9, 129.3, 129.2, 128.8, 127.0,

126.7, 117.4, 117.3, 112.8, 43.4, 43.3, 33.7, 33.5, 28.7, 28.2, 17.3, 17.2. HRMS (ESI) m/z: [M+H]<sup>+</sup>  
Calcd for C<sub>18</sub>H<sub>20</sub>N<sub>3</sub> 278.1652; Found 278.1637.

***N*-(3-(7-Fluoroquinoxalin-2-yl)propyl)aniline/*N*-(3-(6-Fluoroquinoxalin-2-yl)propyl)aniline  
(5r/5r')**

Eluent: petroleum ether/ethyl acetate (2:1). Yellow liquid (29 mg, 52%, regio-isomers: 3/1). <sup>1</sup>H NMR (400 MHz, CDCl<sub>3</sub>): δ 8.70 (s, 1H), 8.09-8.05 (m, 1H), 7.68-7.65 (m, 1H), 7.51-7.46 (m, 1H), 7.18-7.14 (m, 2H), 6.69 (t, *J* = 7.2 Hz, 1H), 6.61 (d, *J* = 8.0 Hz, 2H), 3.86 (br s, 1H), 3.27 (t, *J* = 6.8 Hz, 2H), 3.13 (t, *J* = 7.6 Hz, 2H), 2.24-2.17 (m, 2H). <sup>13</sup>C{<sup>1</sup>H} NMR (150 MHz, CDCl<sub>3</sub>): δ 162.9 (d, <sup>1</sup>*J*<sub>C-F</sub> = 250.5 Hz), 157.6, 148.1, 146.6, 145.1 (d, <sup>4</sup>*J*<sub>C-F</sub> = 3.3 Hz), 143.1, 143.0, 138.5, 131.3 (d, <sup>3</sup>*J*<sub>C-F</sub> = 11.0 Hz), 130.9 (d, <sup>3</sup>*J*<sub>C-F</sub> = 9.9 Hz), 120.4 (d, <sup>2</sup>*J*<sub>C-F</sub> = 26.3 Hz), 119.5 (d, <sup>2</sup>*J*<sub>C-F</sub> = 27.9 Hz), 117.5, 112.9, 112.8, 112.7, 112.6, 112.4, 43.4, 33.7, 33.6, 28.6, 28.5. <sup>19</sup>F{<sup>1</sup>H} NMR (CDCl<sub>3</sub>, 376 MHz): δ -108.0, -109.4. HRMS (ESI) m/z: [M+H]<sup>+</sup> Calcd for C<sub>17</sub>H<sub>17</sub>FN<sub>3</sub> 282.1401; Found 282.1390.

***N*-(3-(7-Bromoquinoxalin-2-yl)propyl)aniline or *N*-(3-(6-Bromoquinoxalin-2-yl)propyl)aniline  
(5s or 5s')**

Eluent: petroleum ether/ethyl acetate (2:1). Yellow liquid (28 mg, 41%). <sup>1</sup>H NMR (400 MHz, CDCl<sub>3</sub>): δ 8.73 (s, 1H), 8.26 (d, *J* = 2.0 Hz, 1H), 7.91 (d, *J* = 8.8 Hz, 1H), 7.83 (dd, *J*<sub>1</sub> = 8.8 Hz, *J*<sub>2</sub> = 2.0 Hz, 1H), 7.19-7.15 (m, 2H), 6.70 (t, *J* = 7.2 Hz, 1H), 6.62-6.60 (m, 2H), 3.82 (br s, 1H), 3.28 (t, *J* = 7.2 Hz, 2H), 3.13 (t, *J* = 7.6 Hz, 2H), 2.24-2.17 (m, 2H). <sup>13</sup>C{<sup>1</sup>H} NMR (150 MHz, CDCl<sub>3</sub>): δ 157.7, 148.1, 146.1, 142.8, 140.1, 132.7, 131.3, 130.6, 129.3, 124.1, 117.5, 112.8, 43.3, 33.7, 28.4. HRMS (ESI) m/z: [M+H]<sup>+</sup> Calcd for C<sub>17</sub>H<sub>17</sub>BrN<sub>3</sub> 342.0600; Found 342.0585.

***N*-(3-(7-Bromoquinoxalin-2-yl)propyl)aniline or *N*-(3-(6-Bromoquinoxalin-2-yl)propyl)aniline  
(5s or 5s')**



Eluent: petroleum ether/ethyl acetate (2:1). Yellow liquid (12 mg, 18%).  $^1\text{H}$  NMR (600 MHz,  $\text{CDCl}_3$ ):  $\delta$  8.74 (s, 1H), 8.23 (d,  $J = 1.8$  Hz, 1H), 7.94 (d,  $J = 9.0$  Hz, 1H), 7.79 (dd,  $J_1 = 9.0$  Hz,  $J_2 = 1.8$  Hz, 1H), 7.18-7.16 (m, 2H), 6.70 (t,  $J = 7.8$  Hz, 1H), 6.61 (d,  $J = 7.8$  Hz, 2H), 3.82 (br s, 1H), 3.27 (t,  $J = 7.2$  Hz, 2H), 3.14 (t,  $J = 7.2$  Hz, 2H), 2.21-2.18 (m, 2H).  $^{13}\text{C}\{^1\text{H}\}$  NMR (150 MHz,  $\text{CDCl}_3$ ):  $\delta$  157.1, 148.1, 146.6, 141.9, 141.0, 133.6, 131.6, 130.2, 129.3, 122.9, 117.5, 112.8, 43.3, 33.7, 28.4. HRMS (ESI)  $m/z$ :  $[\text{M}+\text{H}]^+$  Calcd for  $\text{C}_{17}\text{H}_{17}\text{BrN}_3$  342.0600; Found 342.0580.

### 5. A typical procedure for the synthesis of **6a** and the spectroscopic data of **6a-6f**

To a reaction tube equipped with a stir bar were added 1-phenyl-1,2,3,4,10,10a-hexahydropyrido[2,3-*b*]quinoxaline (**5a**, 53 mg, 0.2 mmol), THF (1 mL),  $t\text{BuONO}$  (80  $\mu\text{L}$ , 0.6 mmol, 90%). The resulting mixture was then stirred at rt under air for 12 h. Upon completion, the mixture was evaporated under vacuum and the crude product was purified by column chromatography on silica-gel with petroleum ether/ethyl acetate (3:1) as the eluent to afford **6a** as yellow liquid in 36 mg (58%). **6b-6f** were obtained in an analogous manner.

#### *N*-(3-Oxo-3-(quinoxalin-2-yl)propyl)-*N*-phenylnitrous amide (**6a**)

Eluent: petroleum ether/ethyl acetate (3:1). Yellow liquid (36 mg, 58%).  $^1\text{H}$  NMR (400 MHz,  $\text{CDCl}_3$ ):  $\delta$  9.45 (s, 1H), 8.18-8.13 (m, 2H), 7.92-7.83 (m, 2H), 7.61 (d,  $J = 7.6$  Hz, 2H), 7.50-7.47 (m, 2H), 7.40-7.36 (m, 1H), 4.52 (t,  $J = 7.2$  Hz, 2H), 3.64 (t,  $J = 7.2$  Hz, 2H).  $^{13}\text{C}\{^1\text{H}\}$  NMR (150 MHz,  $\text{CDCl}_3$ ):  $\delta$  198.7, 145.7, 144.1, 142.9, 141.4, 140.9, 132.5, 131.0, 130.4, 129.6, 129.5, 127.6, 119.8, 39.9, 34.6. HRMS (ESI)  $m/z$ :  $[\text{M}+\text{H}]^+$  Calcd for  $\text{C}_{17}\text{H}_{15}\text{N}_4\text{O}_2$  307.1190; Found 307.1188.

#### *N*-(3-Oxo-3-(quinoxalin-2-yl)propyl)-*N*-(*p*-tolyl)nitrous amide (**6b**)

Eluent: petroleum ether/ethyl acetate (3:1). Yellow liquid (27 mg, 42%).  $^1\text{H}$  NMR (400 MHz,  $\text{CDCl}_3$ ):  $\delta$  9.46 (s, 1H), 8.19-8.13 (m, 2H), 7.93-7.86 (m, 2H), 7.48 (d,  $J = 8.4$  Hz, 2H), 7.29 (d,  $J = 8.0$  Hz, 2H), 4.50 (t,  $J = 7.2$  Hz, 2H), 3.63 (t,  $J = 7.2$  Hz, 2H), 2.41 (s, 3H).  $^{13}\text{C}\{^1\text{H}\}$  NMR (150

MHz, CDCl<sub>3</sub>): δ 198.7, 145.7, 142.9, 140.9, 139.0, 137.8, 132.5, 130.9, 130.5, 130.2, 129.5, 120.0, 40.2, 34.6, 21.0. HRMS (ESI) m/z: [M+H]<sup>+</sup> Calcd for C<sub>18</sub>H<sub>17</sub>N<sub>4</sub>O<sub>2</sub> 321.1346; Found 321.1347.

***N*-(4-Chlorophenyl)-*N*-(3-oxo-3-(quinoxalin-2-yl)propyl)nitrous amide (6c)**

Eluent: petroleum ether/ethyl acetate (3:1). Yellow liquid (46 mg, 67%). <sup>1</sup>H NMR (400 MHz, CDCl<sub>3</sub>): δ 9.45 (s, 1H), 8.18-8.12 (m, 2H), 7.91-7.85 (m, 2H), 7.57 (d, *J* = 8.8 Hz, 2H), 7.46 (d, *J* = 8.8 Hz, 2H), 4.48 (t, *J* = 7.2 Hz, 2H), 3.62 (t, *J* = 7.2 Hz, 2H). <sup>13</sup>C{<sup>1</sup>H} NMR (150 MHz, CDCl<sub>3</sub>): δ 198.6, 145.6, 144.2, 142.9, 140.9, 140.0, 133.3, 132.6, 131.1, 130.4, 129.8, 129.5, 120.8, 39.7, 34.5. HRMS (ESI) m/z: [M+H]<sup>+</sup> Calcd for C<sub>17</sub>H<sub>14</sub>ClN<sub>4</sub>O<sub>2</sub> 341.0800; Found 341.0798.

***N*-(4-Bromophenyl)-*N*-(3-oxo-3-(quinoxalin-2-yl)propyl)nitrous amide (6d)**

Eluent: petroleum ether/ethyl acetate (3:1). Yellow solid (49 mg, 64%), mp 126-127 °C. <sup>1</sup>H NMR (400 MHz, CDCl<sub>3</sub>): δ 9.46 (s, 1H), 8.19-8.13 (m, 2H), 7.91-7.86 (m, 2H), 7.62 (d, *J* = 8.4 Hz, 2H), 7.51 (d, *J* = 8.4 Hz, 2H), 4.48 (t, *J* = 7.2 Hz, 2H), 3.62 (t, *J* = 7.2 Hz, 2H). <sup>13</sup>C{<sup>1</sup>H} NMR (150 MHz, CDCl<sub>3</sub>): δ 198.5, 145.6, 144.2, 142.9, 140.9, 140.5, 132.7, 132.6, 131.0, 130.4, 129.5, 121.1, 121.0, 39.6, 34.5. HRMS (ESI) m/z: [M+H]<sup>+</sup> Calcd for C<sub>17</sub>H<sub>14</sub>BrN<sub>4</sub>O<sub>2</sub> 385.0295; Found 385.0320.

***N*-(3-Oxo-3-(quinoxalin-2-yl)propyl)-*N*-(*m*-tolyl)nitrous amide (6e)**

Eluent: petroleum ether/ethyl acetate (3:1). Yellow liquid (35 mg, 54%). <sup>1</sup>H NMR (400 MHz, CDCl<sub>3</sub>): δ 9.46 (s, 1H), 8.19-8.13 (m, 2H), 7.93-7.84 (m, 2H), 7.41-7.37 (m, 3H), 7.20-7.19 (m, 1H), 4.51 (t, *J* = 7.2 Hz, 2H), 3.63 (t, *J* = 7.2 Hz, 2H), 2.42 (s, 3H). <sup>13</sup>C{<sup>1</sup>H} NMR (150 MHz, CDCl<sub>3</sub>): δ 198.8, 145.7, 144.1, 142.9, 141.4, 140.9, 139.7, 132.5, 131.0, 130.5, 129.5, 129.4, 128.4, 120.7, 117.0, 40.1, 34.6, 21.5. HRMS (ESI) m/z: [M+H]<sup>+</sup> Calcd for C<sub>18</sub>H<sub>17</sub>N<sub>4</sub>O<sub>2</sub> 321.1346; Found 321.1352.

***N*-(3-Bromophenyl)-*N*-(3-oxo-3-(quinoxalin-2-yl)propyl)nitrous amide (6f)**

Eluent: petroleum ether/ethyl acetate (3:1). Yellow liquid (46 mg, 60%). <sup>1</sup>H NMR (400 MHz,

CDCl<sub>3</sub>):  $\delta$  9.46 (s, 1H), 8.19-8.15 (m, 2H), 7.93-7.81 (m, 3H), 7.58-7.50 (m, 2H), 7.36 (t,  $J = 8.0$  Hz, 1H), 4.48 (t,  $J = 7.2$  Hz, 2H), 3.61 (t,  $J = 7.2$  Hz, 2H). <sup>13</sup>C{<sup>1</sup>H} NMR (150 MHz, CDCl<sub>3</sub>):  $\delta$  198.5, 145.6, 144.2, 142.9, 142.6, 140.9, 132.6, 131.0, 130.9, 130.5, 130.4, 129.5, 123.3, 122.6, 117.9, 39.6, 34.5. HRMS (ESI)  $m/z$ : [M+H]<sup>+</sup> Calcd for C<sub>17</sub>H<sub>14</sub>BrN<sub>4</sub>O<sub>2</sub> 385.0295; Found 385.0302.

## 6. Control Experiments

**6.1.** To a reaction tube equipped with a stir bar were added 1-(phenyl)piperidine (**1a**, 32 mg, 0.2 mmol), acetone (1 mL), NH<sub>4</sub>SCN (**2**, 46 mg, 0.6 mmol), 4-OH-T<sup>+</sup>OTf<sup>-</sup> (114 mg, 0.4 mmol), and BHT (132 mg, 0.6 mmol). The resulting mixture was then stirred at room temperature under N<sub>2</sub> for 6 h. Upon completion, the mixture was diluted with ethyl acetate (10 mL  $\times$  3) and aqueous NaHCO<sub>3</sub> (10 mL, 1 M). The organic layer was dried over anhydrous Na<sub>2</sub>SO<sub>4</sub> and filtered. Then, the solvent was evaporated under vacuum and the crude product was purified by column chromatography on silica-gel with petroleum ether/ethyl acetate (3:1) as the eluent to afford **3a** as yellow solid in 25 mg (54%).

**6.2.** To a reaction tube equipped with a stir bar were added 1-(phenyl)piperidine (**1a**, 32 mg, 0.2 mmol), DMF (1 mL), T<sup>+</sup>BF<sub>4</sub><sup>-</sup> (97 mg, 0.4 mmol), *o*-phenylenediamine (**4a**, 43 mg, 0.4 mmol), KSCN (19 mg, 0.2 mmol), and BHT (132 mg, 0.6 mmol). The resulting mixture was then stirred at room temperature under air for 6 h. Upon completion, the mixture was diluted with ethyl acetate and aqueous NaCl. The organic layer was dried over anhydrous Na<sub>2</sub>SO<sub>4</sub> and filtered. Then, the solvent was evaporated under vacuum and the crude product was purified by column chromatography on silica-gel with petroleum ether/ethyl acetate (2:1) as the eluent to afford **5a** as brown solid in 32 mg (61%).

**6.3.** To a reaction tube equipped with a stir bar were added 1-(phenyl)piperidine (**1a**, 32 mg, 0.2 mmol), acetone (1 mL), NH<sub>4</sub>SCN (**2**, 46 mg, 0.6 mmol), and 4-OH-T<sup>+</sup>OTf<sup>-</sup> (114 mg, 0.4 mmol).

The resulting mixture was then stirred at room temperature under N<sub>2</sub> for 1 h. Subsequent HRMS analysis of the resulting mixture showed that 5-((4-hydroxy-2,2,6,6-tetramethylpiperidin-1-yl)oxy)-1-phenyl-2,3,4,5-tetrahydropyridin-1-ium **i** (calcd, 331.2380; found 331.2371) was formed (Fig. S1).

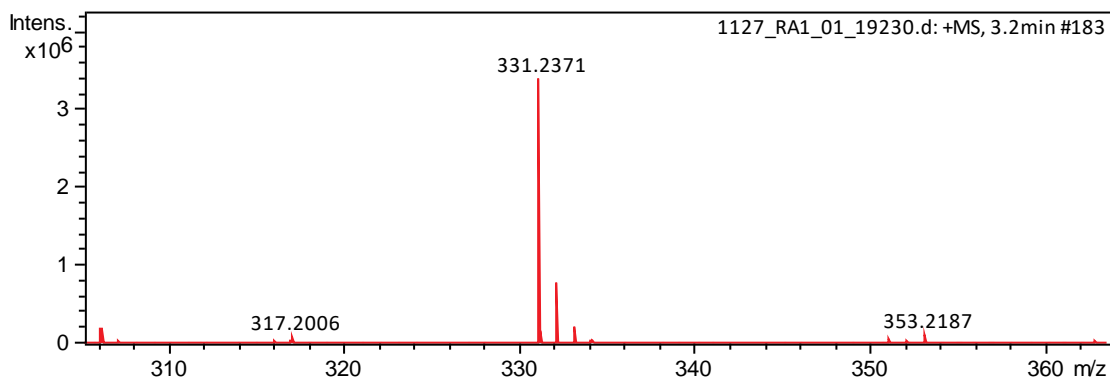

**Fig. S1 Copy of HRMS Spectra of the Reaction Mixture for the Formation of 3a**

**6.4.** To a reaction tube equipped with a stir bar were added 1-(phenyl)piperidine (**1a**, 32 mg, 0.2 mmol), DMF (1 mL), T<sup>+</sup>BF<sub>4</sub><sup>-</sup> (97 mg, 0.4 mmol), *o*-phenylenediamine (**4a**, 43 mg, 0.4 mmol), and KSCN (19 mg, 0.2 mmol). The resulting mixture was then stirred at room temperature under air for 1 h. Subsequent HRMS analysis of the resulting mixture showed that 5-oxo-1-phenyl-2,3,4,5-tetrahydropyridin-1-ium **ii** (calcd, 174.0913; found, 174.0916) was formed (Fig. S2).

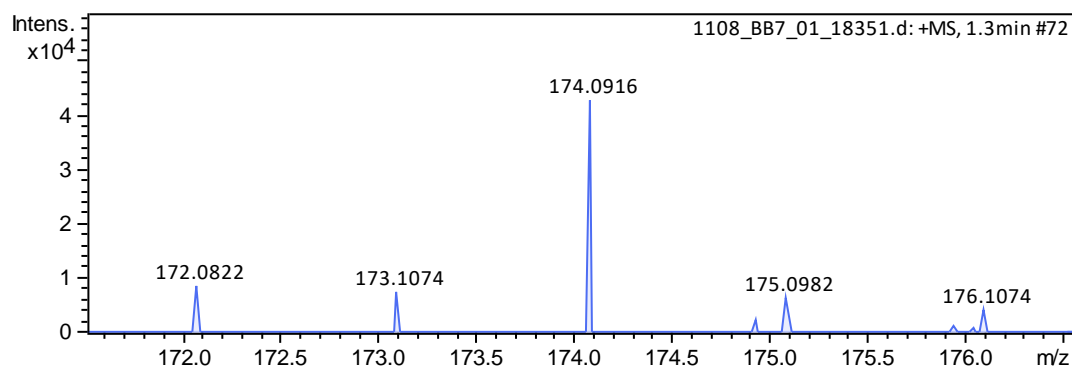

**Fig. S2 Copy of HRMS Spectra of the Reaction Mixture for the Formation of 5a**

**6.5.** To a reaction tube equipped with a stir bar were added 1-(phenyl)piperidine (**1a**, 32 mg, 0.2

mmol), acetone (1 mL), NH<sub>4</sub>SCN (**2**, 46 mg, 0.6 mmol), 4-OH-T<sup>+</sup>OTf<sup>-</sup> (114 mg, 0.4 mmol), and 4 Å MS (200 mg). The resulting mixture was then stirred at room temperature under N<sub>2</sub> for 6 h. Upon completion, the mixture was diluted with ethyl acetate (10 mL × 3) and aqueous NaHCO<sub>3</sub> (10 mL, 1 M). The organic layer was dried over anhydrous Na<sub>2</sub>SO<sub>4</sub> and filtered. Then, the solvent was evaporated under vacuum and the crude product was purified by column chromatography on silica-gel with petroleum ether/ethyl acetate (3:1) as the eluent to afford **3a** as yellow solid in 7 mg (15%).

**6.6.** To a reaction tube equipped with a stir bar were added 1-(phenyl)piperidine (**1a**, 32 mg, 0.2 mmol), DMF (1 mL), T<sup>+</sup>BF<sub>4</sub><sup>-</sup> (97 mg, 0.4 mmol), *o*-phenylenediamine (**4a**, 43 mg, 0.4 mmol), KSCN (19 mg, 0.2 mmol), and 4 Å MS (200 mg). The resulting mixture was then stirred at room temperature under air for 6 h. Upon completion, the mixture was diluted with ethyl acetate and aqueous NaCl. The organic layer was dried over anhydrous Na<sub>2</sub>SO<sub>4</sub> and filtered. Then, the solvent was evaporated under vacuum and the crude product was purified by column chromatography on silica-gel with petroleum ether/ethyl acetate (2:1) as the eluent to afford **5a** as brown solid in 22 mg (41%).

**6.7.** To a reaction tube equipped with a stir bar were added **1a** (32 mg, 0.2 mmol), **1a-*a*-d<sub>4</sub>** (33 mg, 0.2 mmol) (Fig. S3), acetone (1 mL), NH<sub>4</sub>SCN (**2**, 46 mg, 0.6 mmol), and 4-OH-T<sup>+</sup>OTf<sup>-</sup> (114 mg, 0.4 mmol). The resulting mixture was then stirred at room temperature under N<sub>2</sub> for 2 h. Upon completion, the mixture was diluted with ethyl acetate (10 mL × 3) and aqueous NaHCO<sub>3</sub> (10 mL, 1 M). The organic layer was dried over anhydrous Na<sub>2</sub>SO<sub>4</sub> and filtered. Then, the solvent was evaporated under vacuum and the crude product was purified by column chromatography on silica-gel with petroleum ether/ethyl acetate (3:1) as the eluent to afford **3a** and **3a-*d*<sub>3</sub>**. Upon analyzing the <sup>1</sup>H NMR spectrum of the mixture, the ratio of **3a** to **3a-*d*<sub>3</sub>** was determined to be 2.6:1

(Fig. S4). Accordingly, the intermolecular KIE ( $k_H/k_D$ ) was calculated to be 2.6.

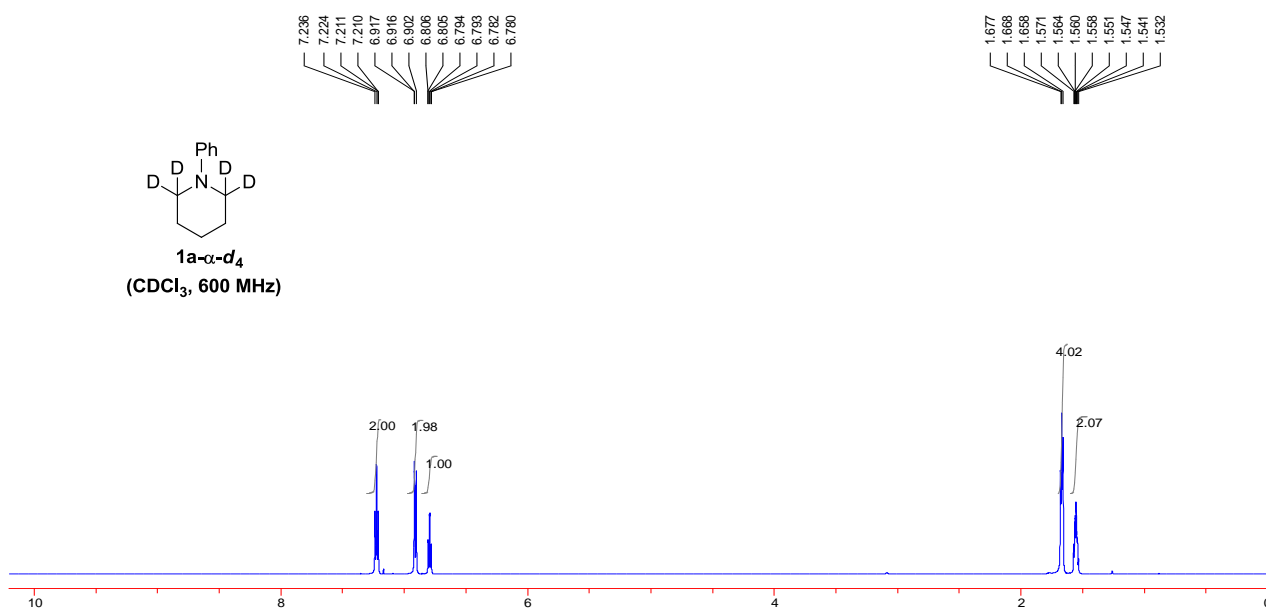

**Fig. S3 Copy of  $^1\text{H}$ NMR Spectrum of  $1\text{a-}\alpha\text{-d}_4$**

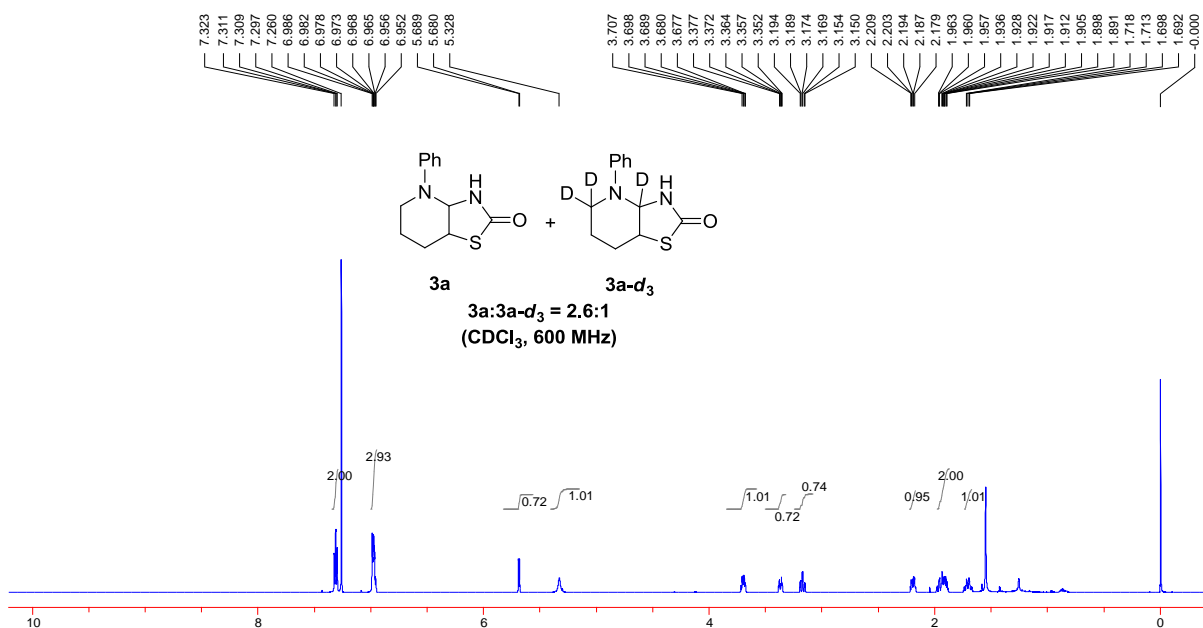

**Fig. S4 Copy of  $^1\text{H}$ NMR Spectrum of the Products  $3\text{a}$  and  $3\text{a-}d_3$**

**6.8.** To a reaction tube equipped with a stir bar were added 1-(phenyl)piperidine (**1a**, 32 mg, 0.2 mmol), **1a- $\alpha$ - $d_4$**  (33 mg, 0.2 mmol), DMF (1 mL),  $\text{T}^+\text{BF}_4^-$  (97 mg, 0.4 mmol), *o*-phenylenediamine (**4a**, 43 mg, 0.4 mmol), and KSCN (19 mg, 0.2 mmol). The resulting mixture was then stirred at room temperature under air for 5 min. Upon completion, the mixture was diluted with ethyl acetate

and aqueous NaCl. The organic layer was dried over anhydrous Na<sub>2</sub>SO<sub>4</sub> and filtered. Then, the solvent was evaporated under vacuum and the crude product was purified by column chromatography on silica-gel with petroleum ether/ethyl acetate (2:1) as the eluent to afford **5a** and **5a-d<sub>3</sub>**. Upon analyzing the <sup>1</sup>H NMR spectrum of the mixture, the ratio of **5a** to **5a-d<sub>3</sub>** was determined to be 3:1 (Fig. S5). Accordingly, the intermolecular KIE ( $k_H/k_D$ ) was calculated to be 3.

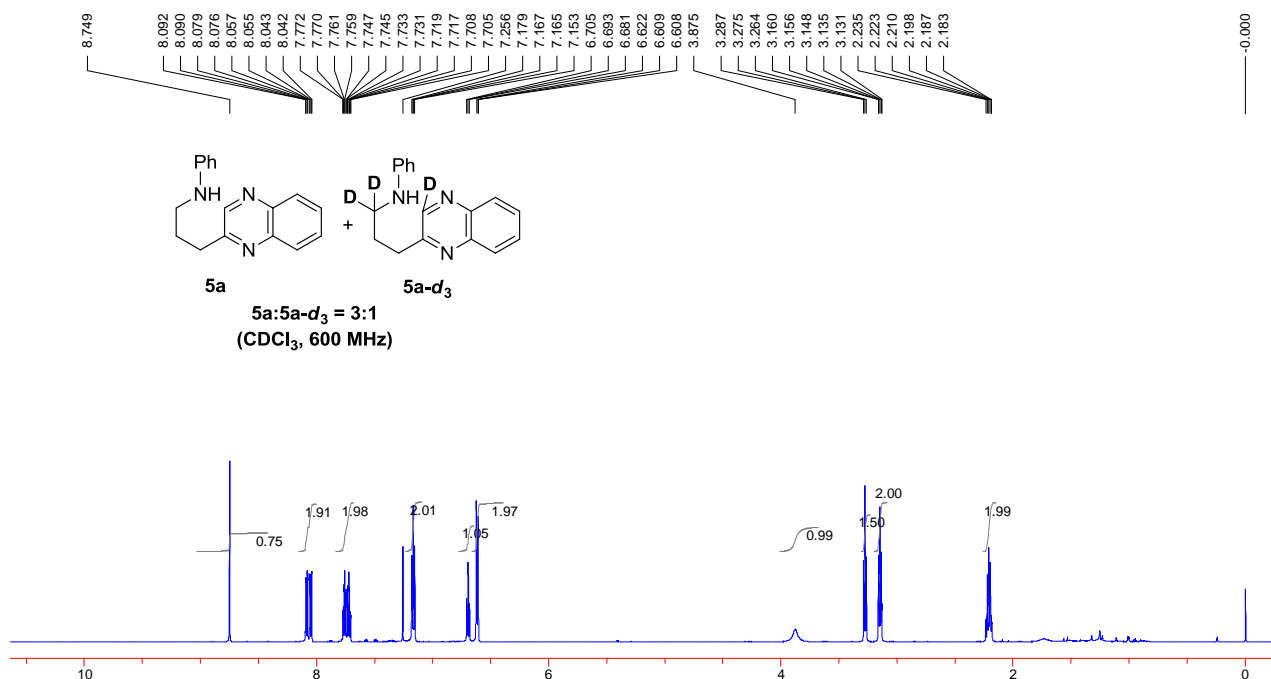

**Fig. S5 Copy of <sup>1</sup>H NMR Spectrum of the Products **5a** and **5a-d<sub>3</sub>****

## 7. Gram-Scale Reaction

**7.1.** To a reaction tube equipped with a stir bar were added 1-(phenyl)piperidine (**1a**, 1.288 g, 8 mmol), acetone (40 mL), NH<sub>4</sub>SCN (**2**, 1.827 g, 24 mmol), and 4-OH-T<sup>+</sup>OTf<sup>-</sup> (5.136 g, 16 mmol). The resulting mixture was then stirred at room temperature under N<sub>2</sub> for 6 h. Upon completion, the mixture was diluted with ethyl acetate (100 mL × 3) and aqueous NaHCO<sub>3</sub> (100 mL, 1 M). The organic layer was dried over anhydrous Na<sub>2</sub>SO<sub>4</sub> and filtered. Then, the solvent was evaporated under vacuum and the crude product was purified by column chromatography on silica-gel with petroleum ether/ethyl acetate (3:1) as the eluent to afford **3a** as yellow solid in 1.086 g (58%).

**7.2.** To a reaction tube equipped with a stir bar were added 1-(phenyl)piperidine (**1a**, 1.288 g, 8 mmol), DMF (30 mL), T<sup>+</sup>BF<sub>4</sub><sup>-</sup> (3.888 g, 16 mmol), *o*-phenylenediamine (**4a**, 1.730 g, 16 mmol), and KSCN (0.777 g, 8 mmol). The resulting mixture was then stirred at room temperature under air for 6 h. Upon completion, the mixture was diluted with ethyl acetate (100 mL × 3) and aqueous NaCl (100 mL × 2). The organic layer was dried over anhydrous Na<sub>2</sub>SO<sub>4</sub> and filtered. Then, the solvent was evaporated under vacuum and the crude product was purified by column chromatography on silica-gel with petroleum ether/ethyl acetate (2:1) as the eluent to afford **5a** as brown solid in 1.304 g (62%).



### III. Copies of the NMR spectra of 3a-3q

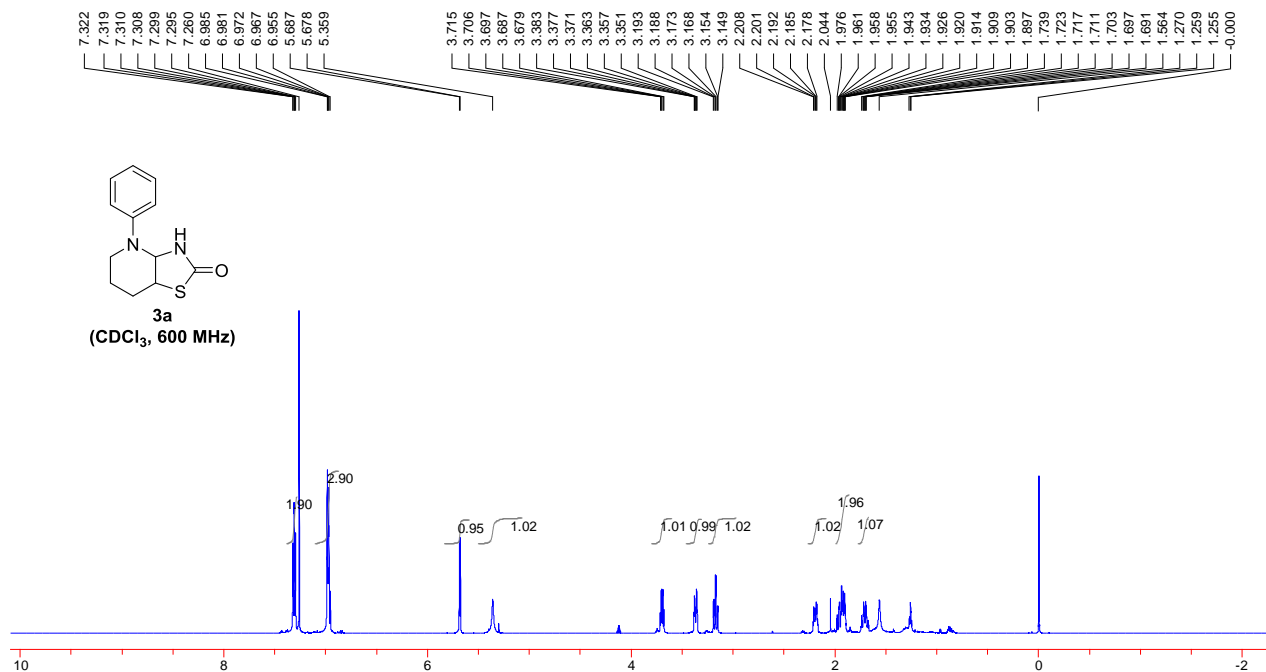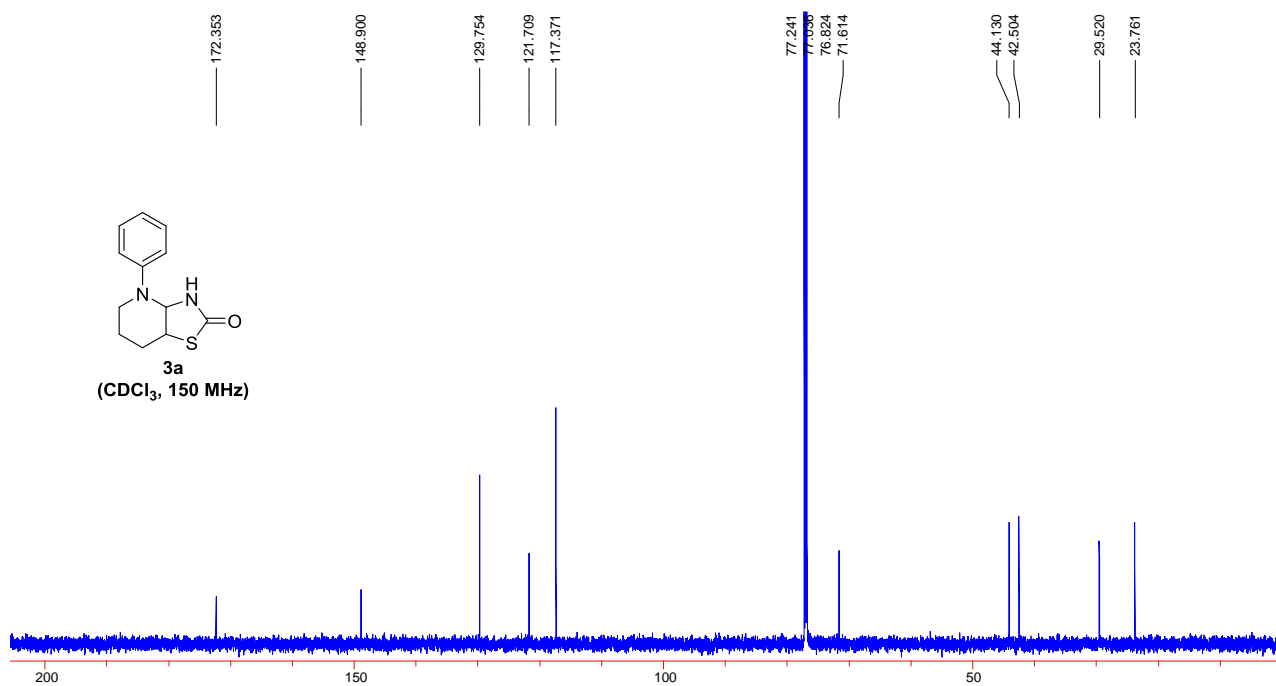

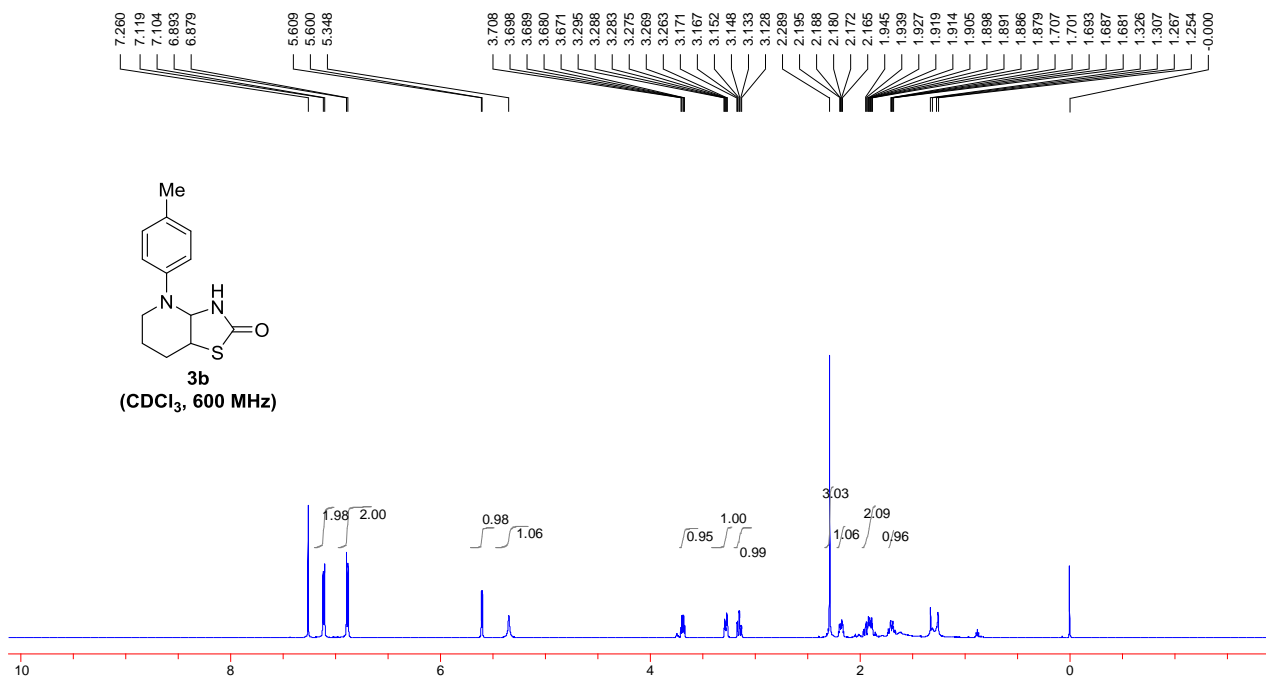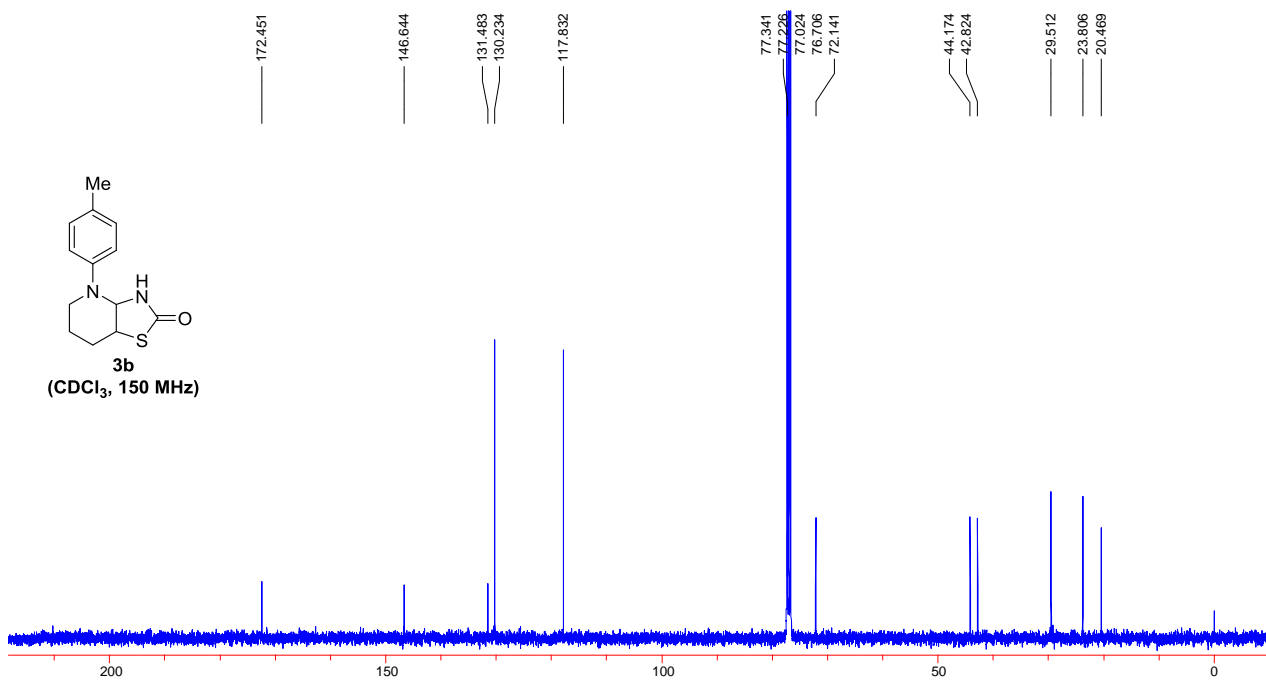

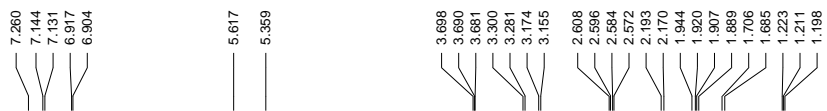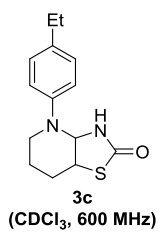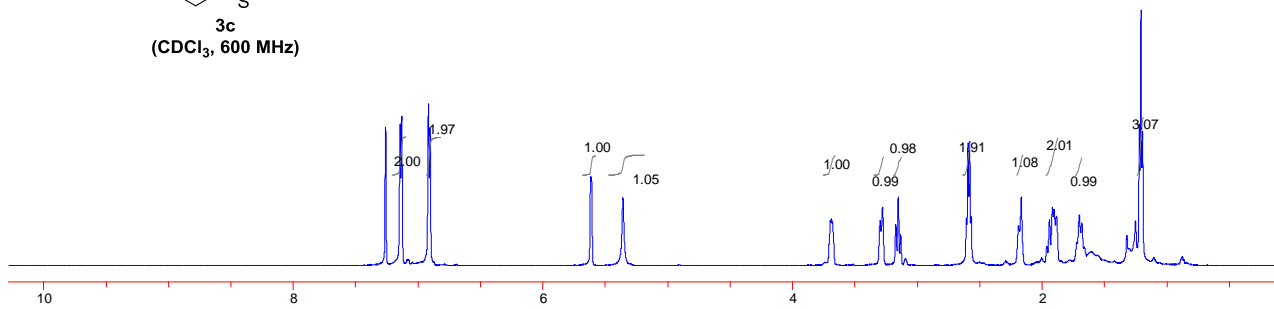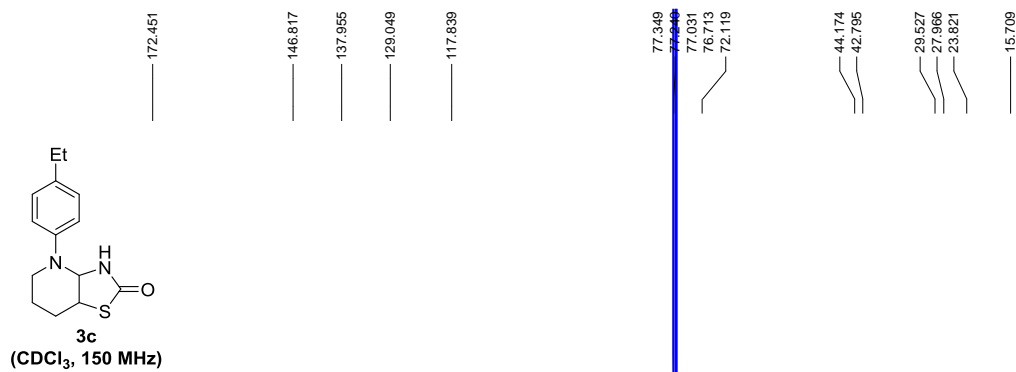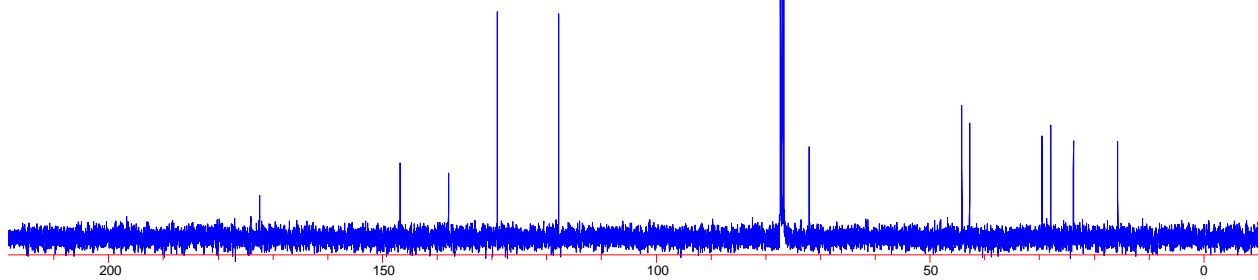

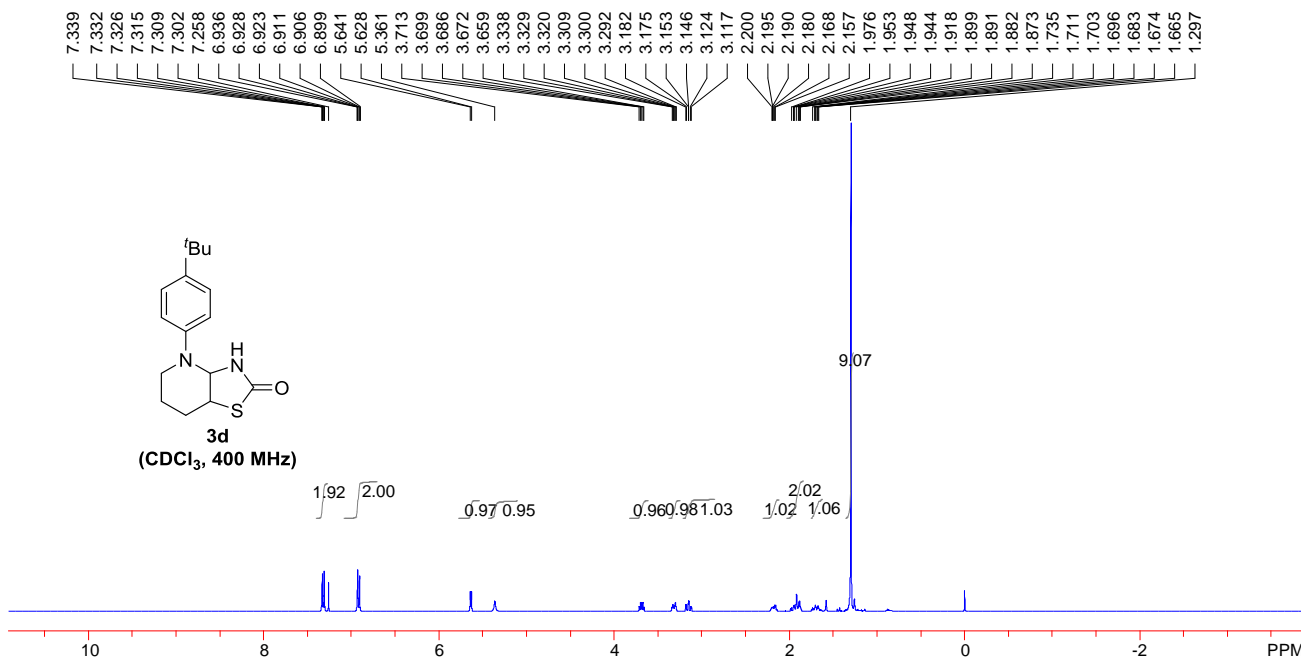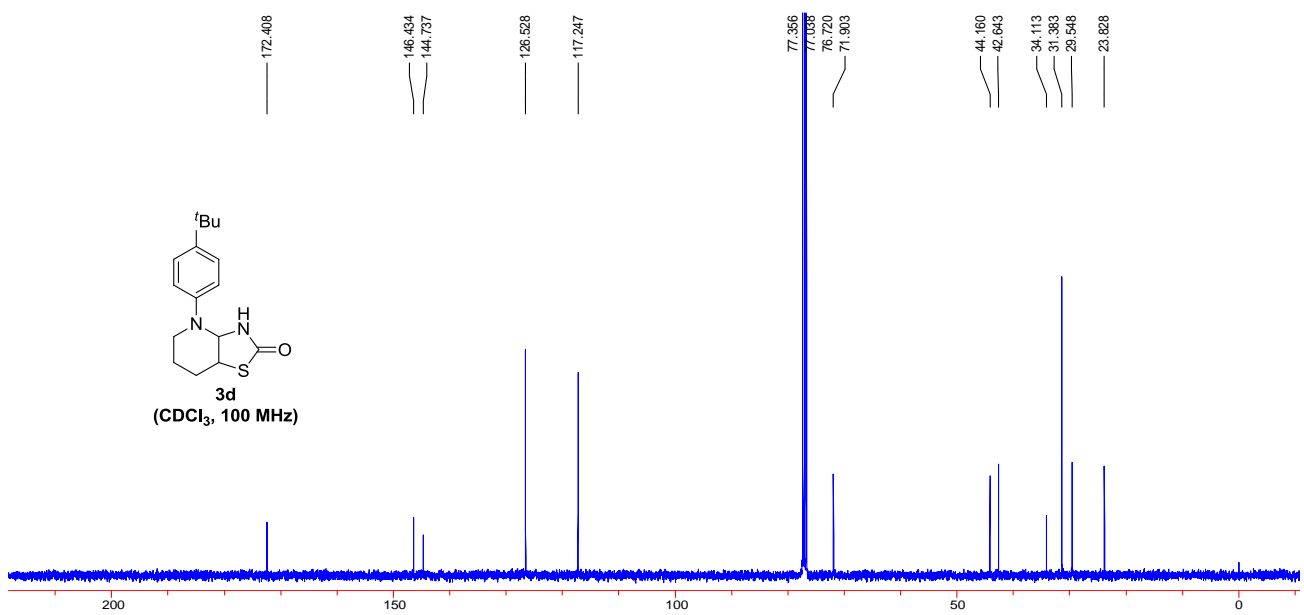

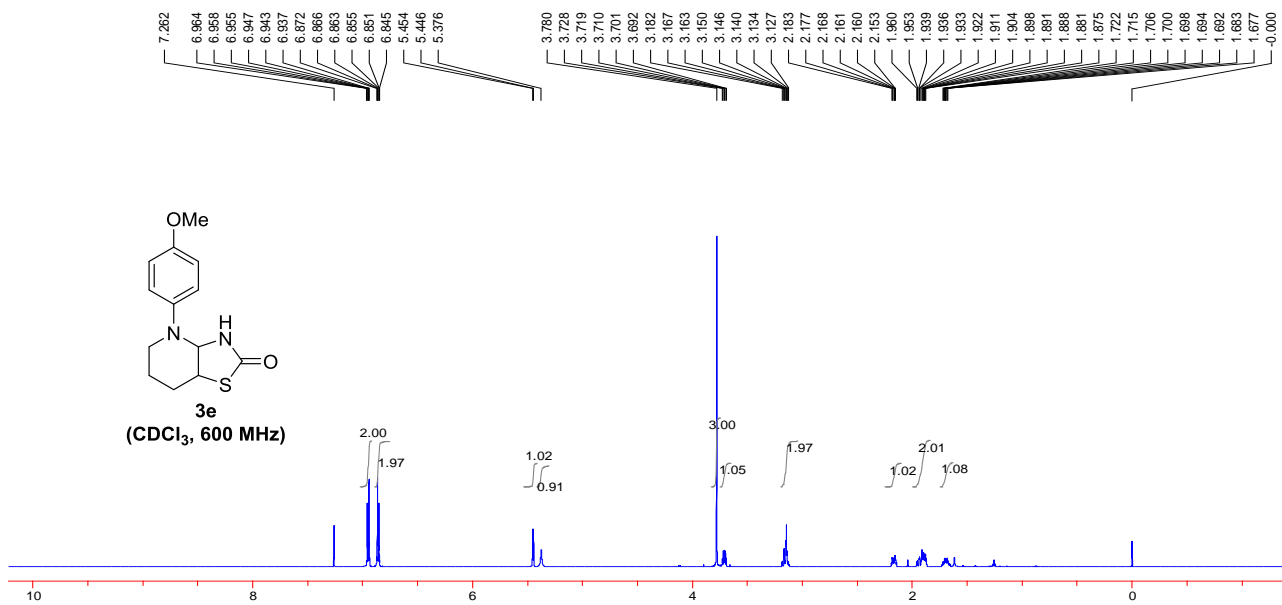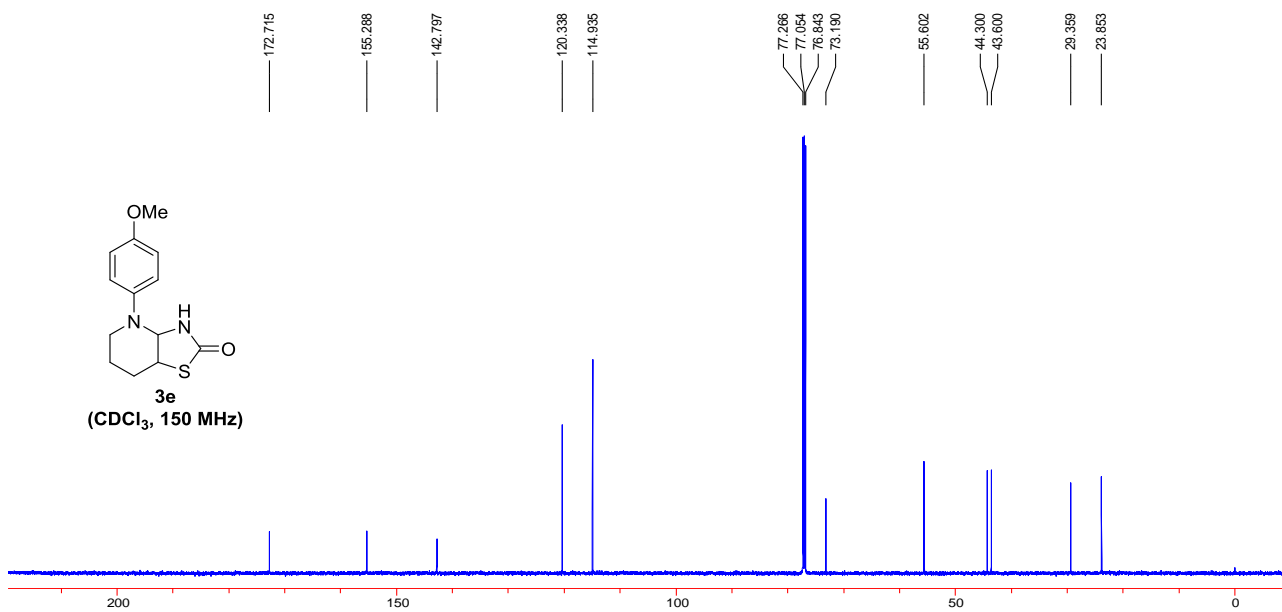

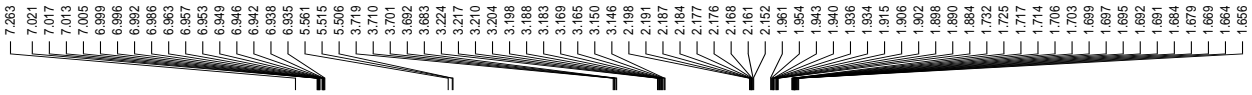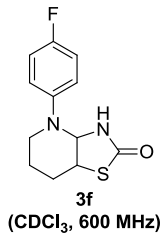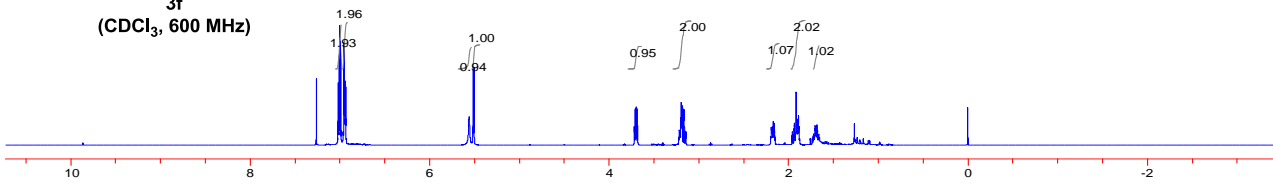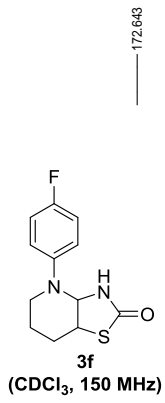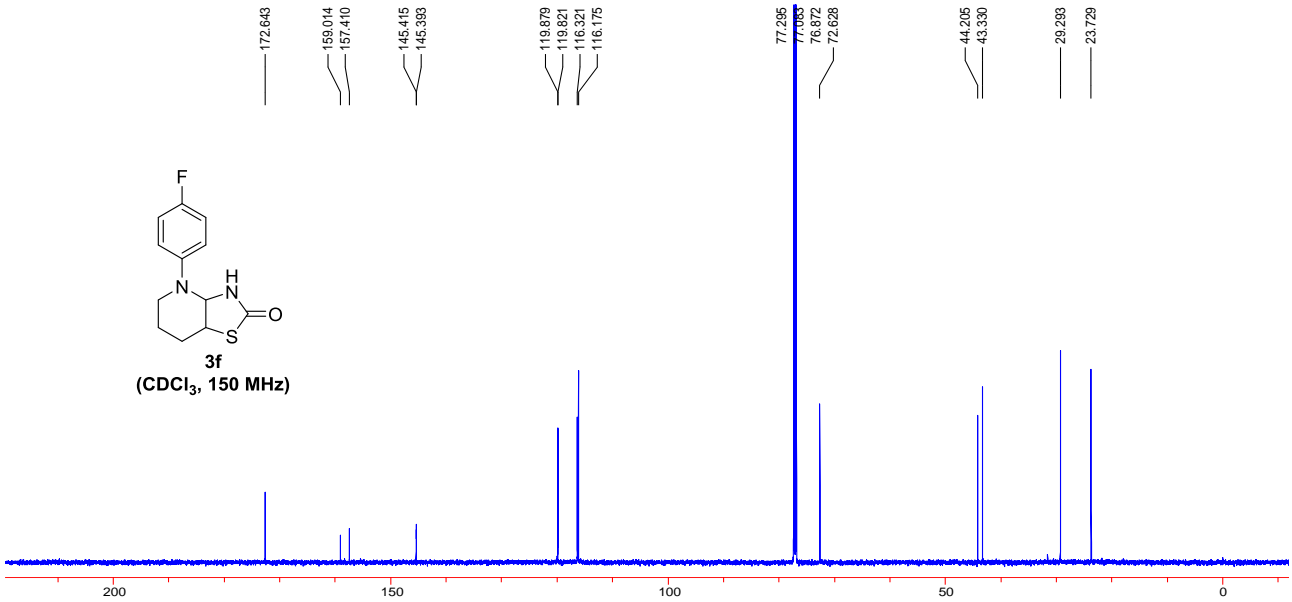

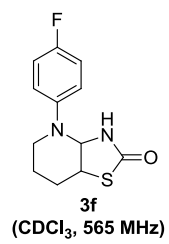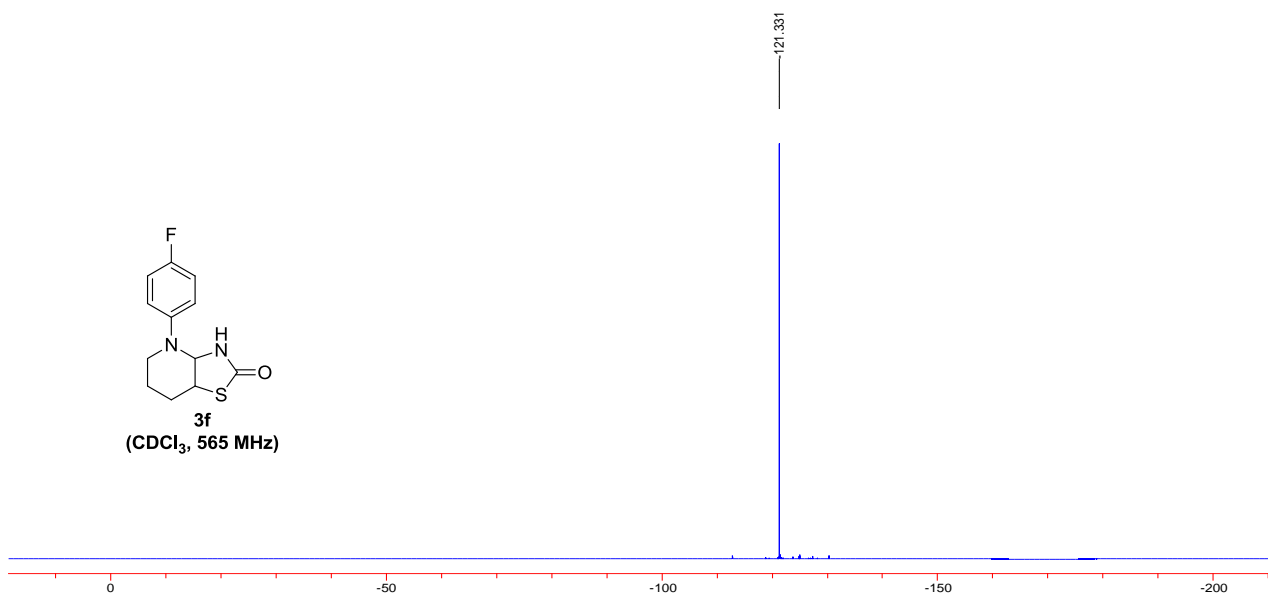

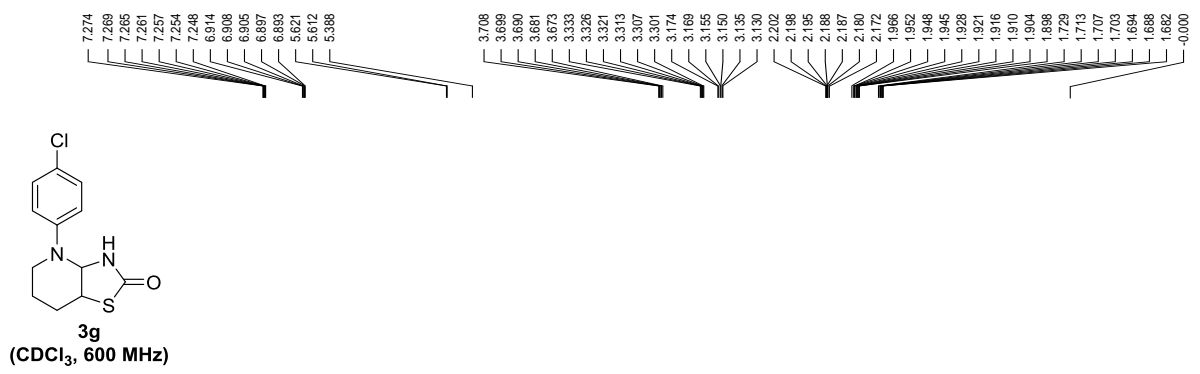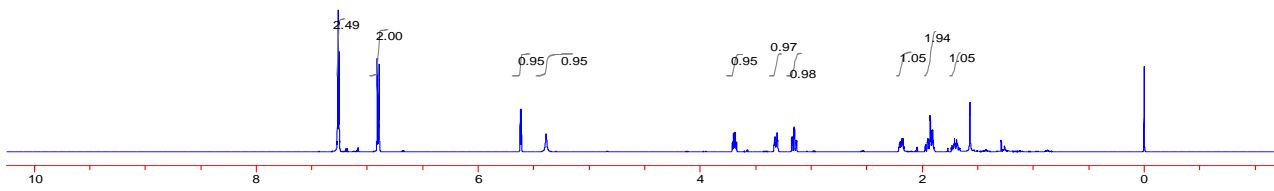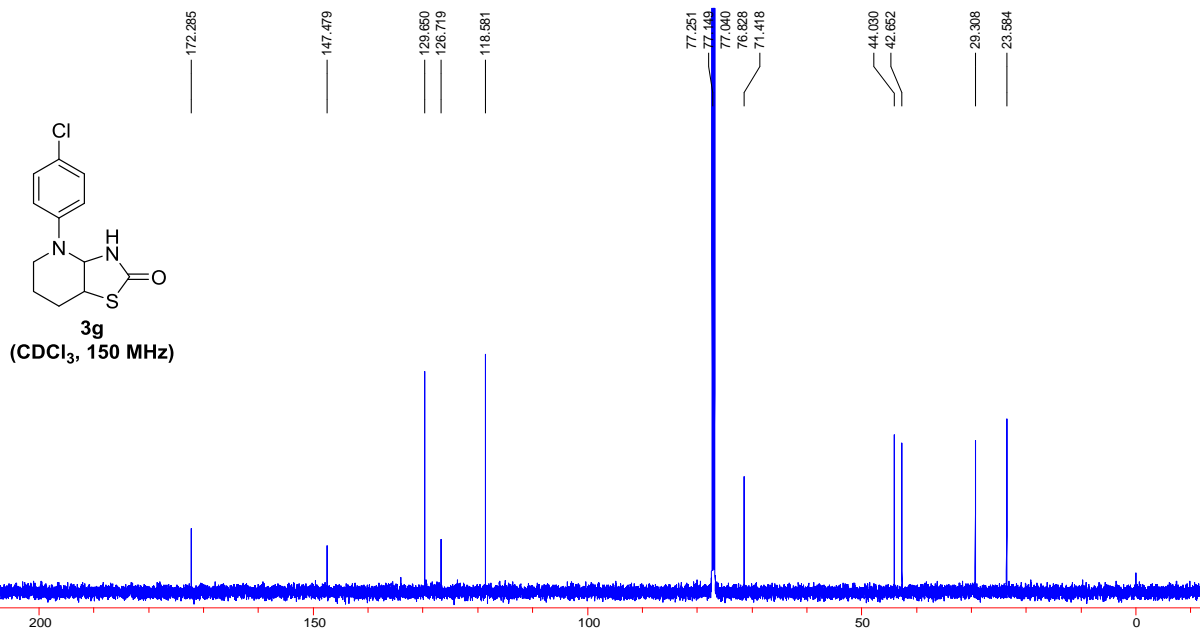



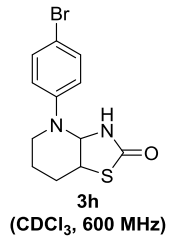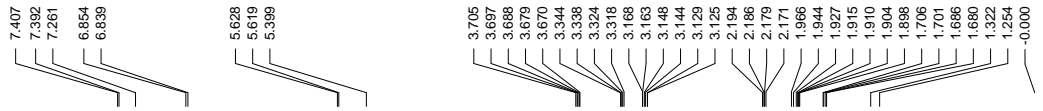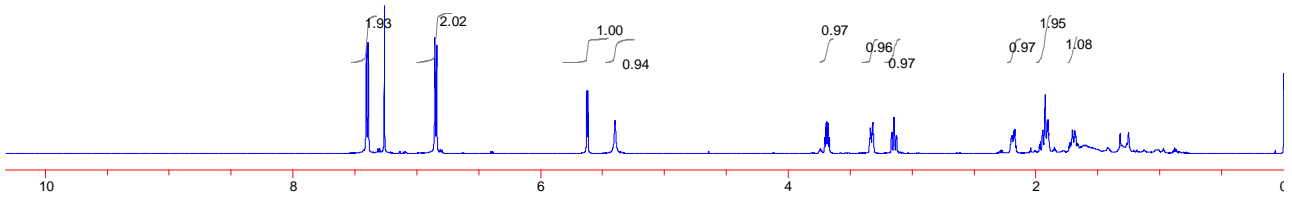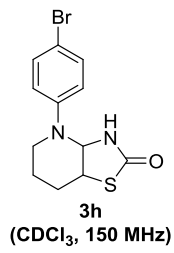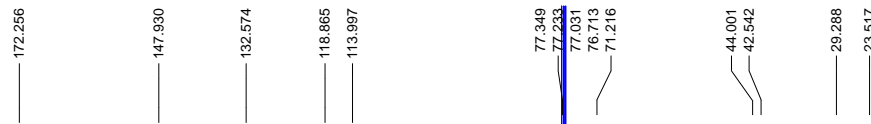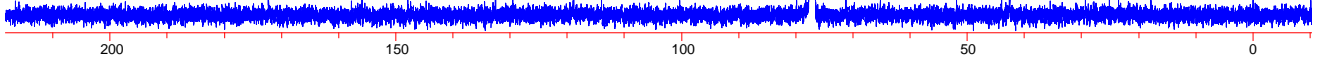

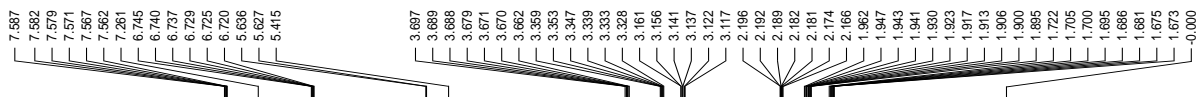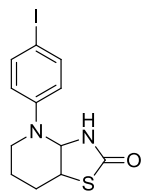

**3i**  
(CDCl<sub>3</sub>, 600 MHz)

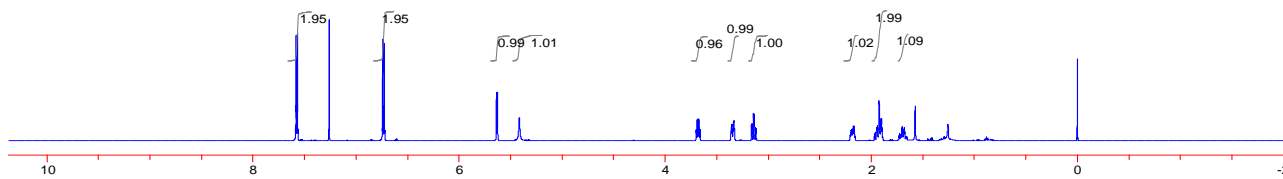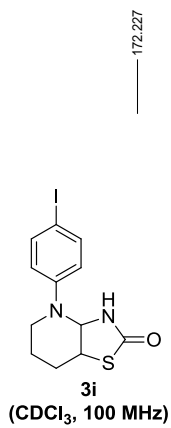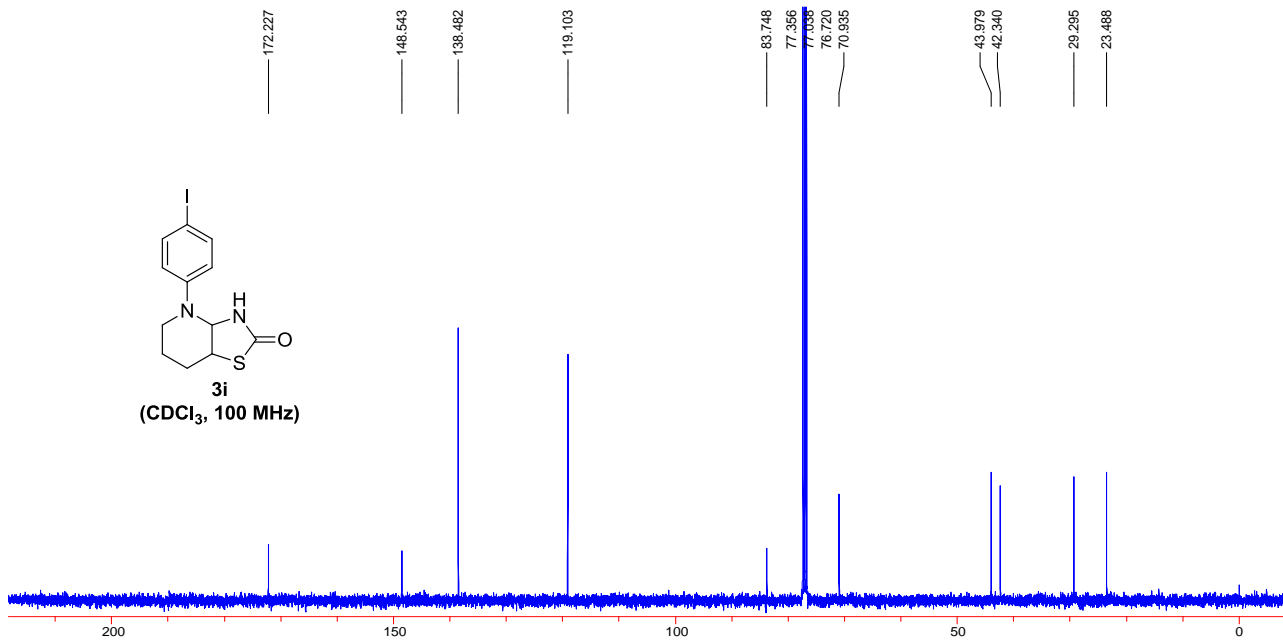

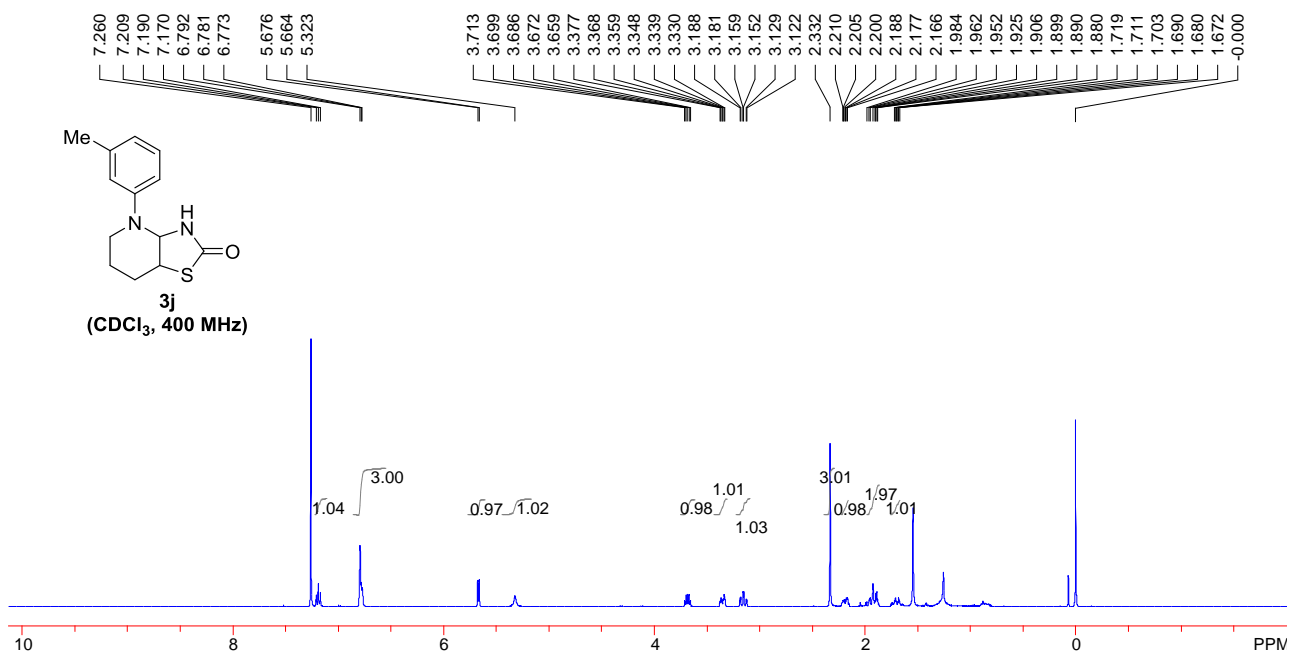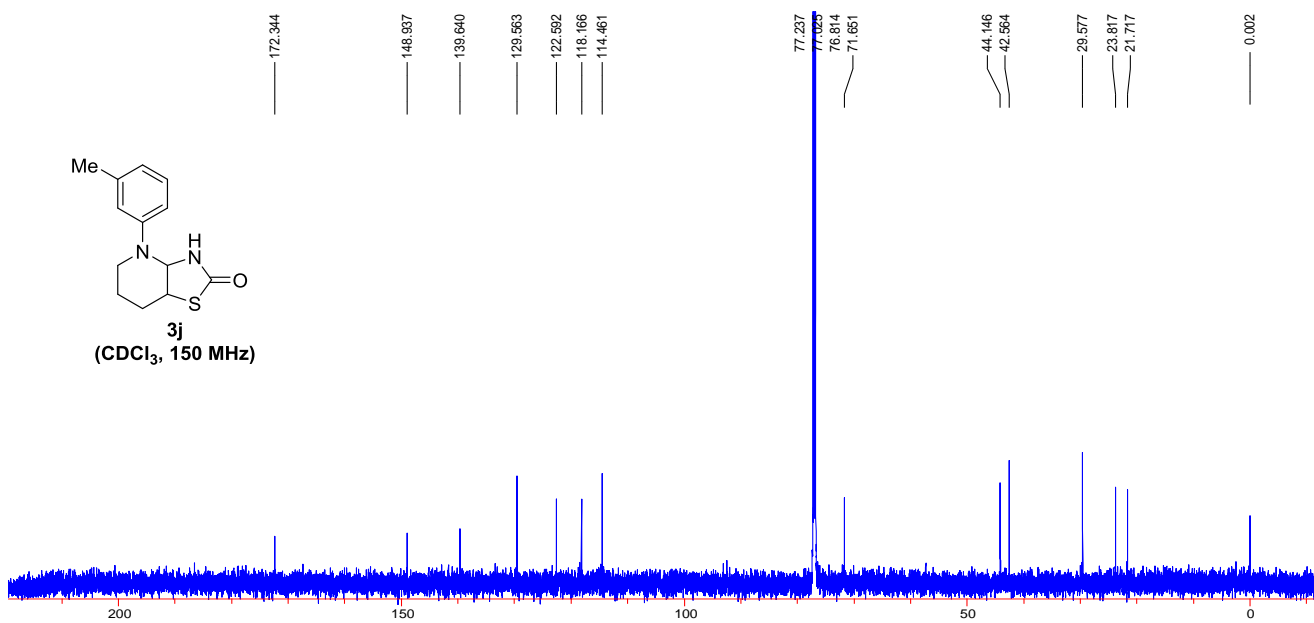

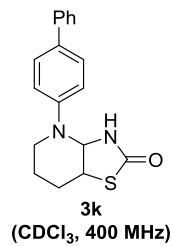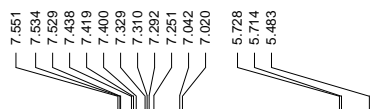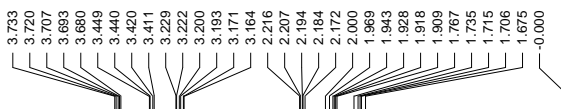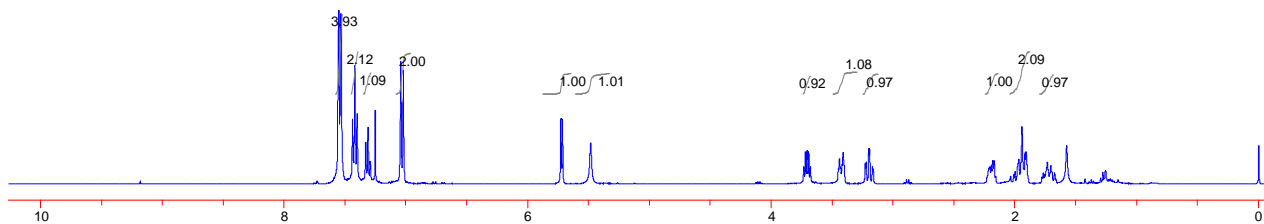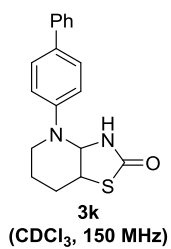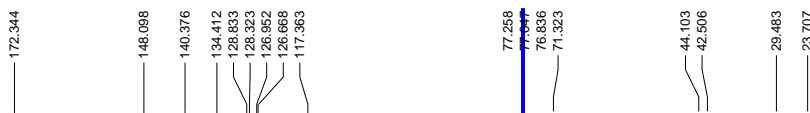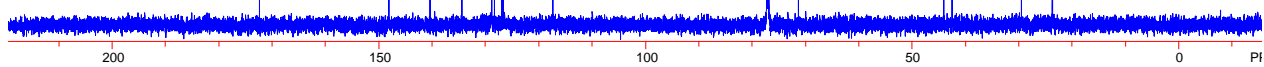

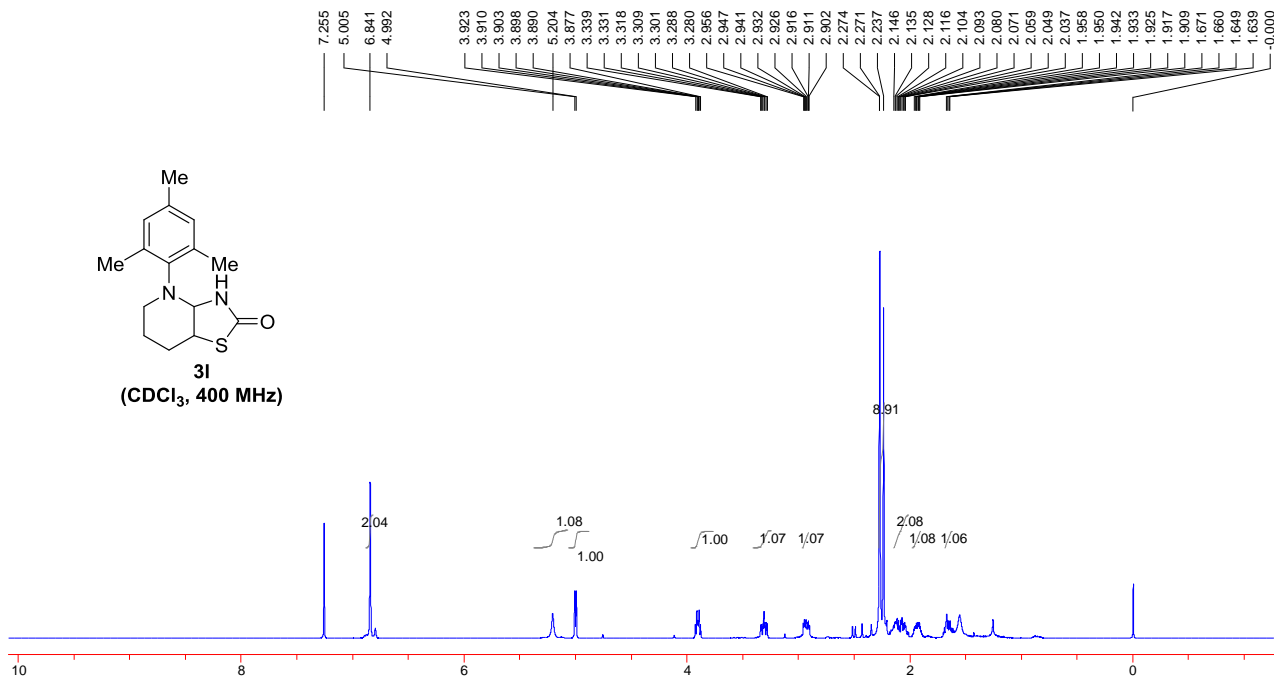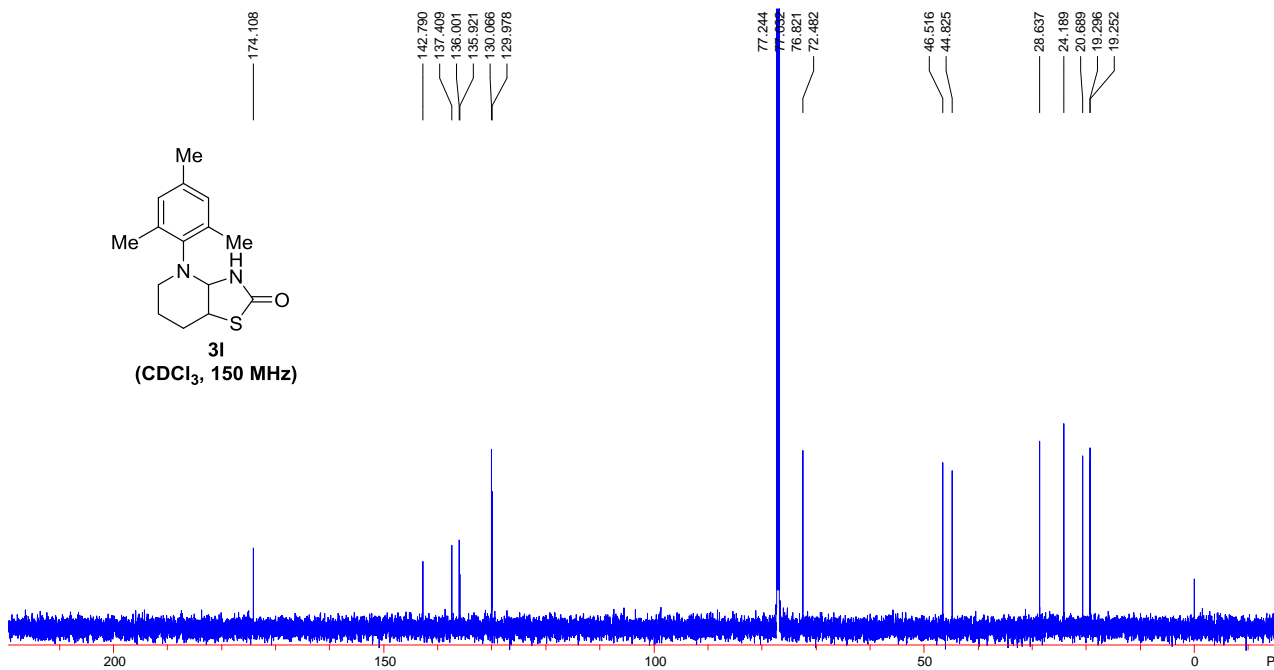

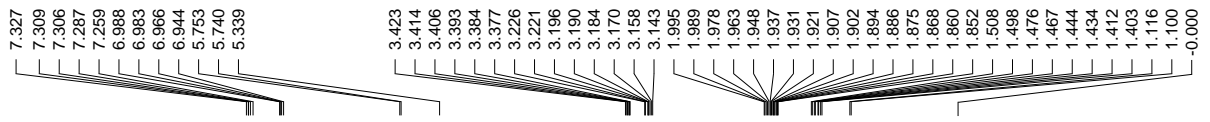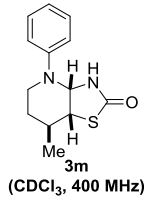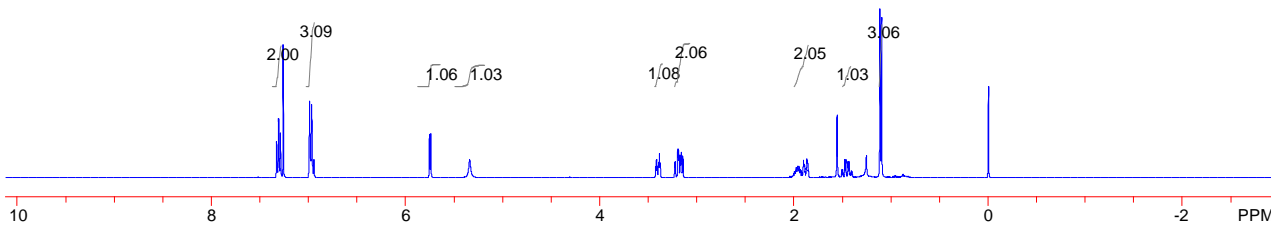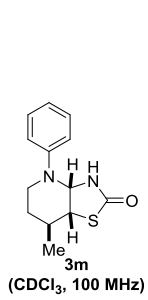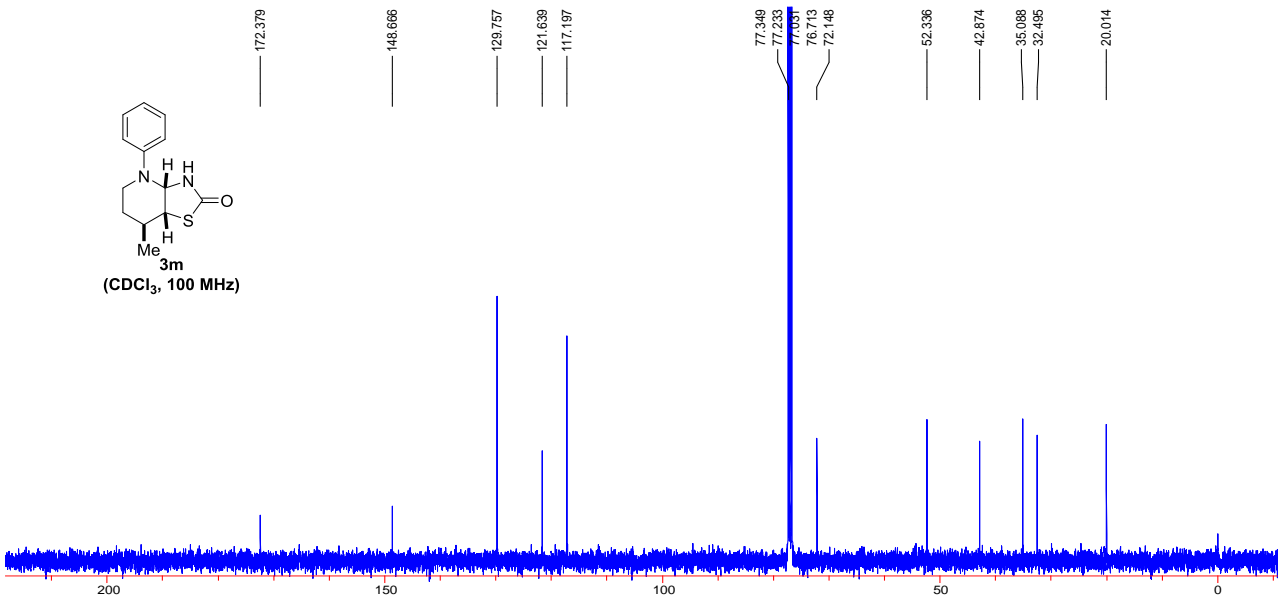

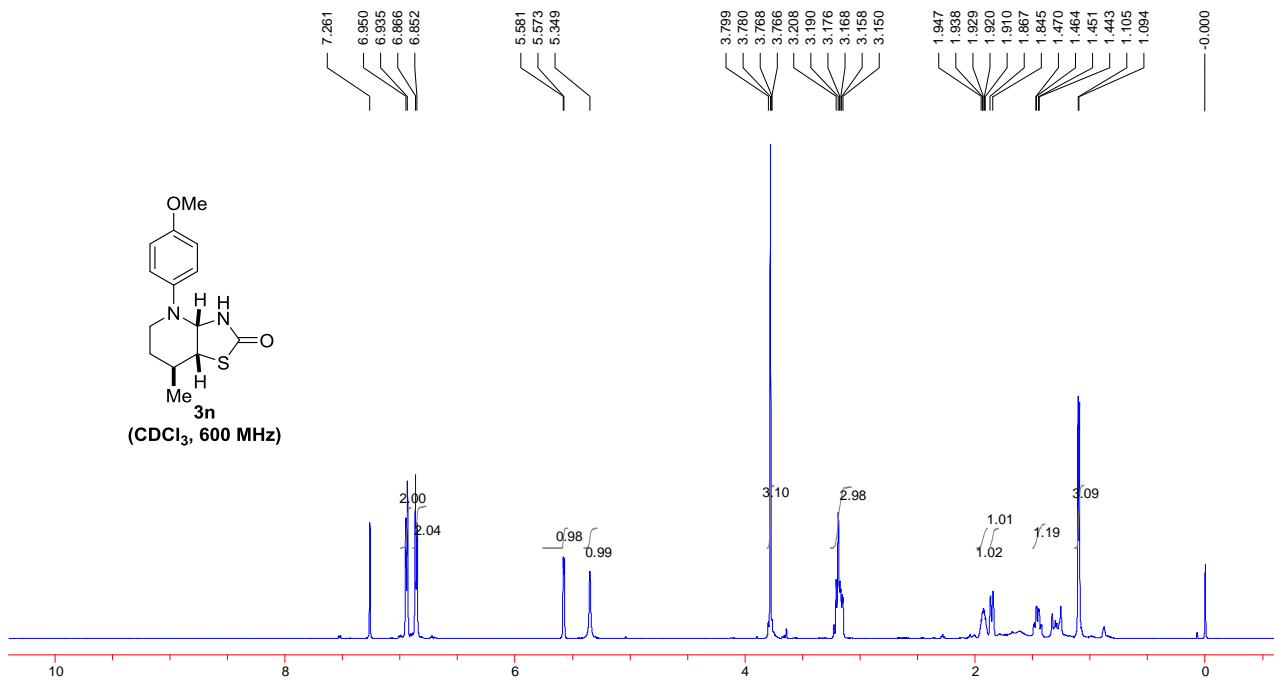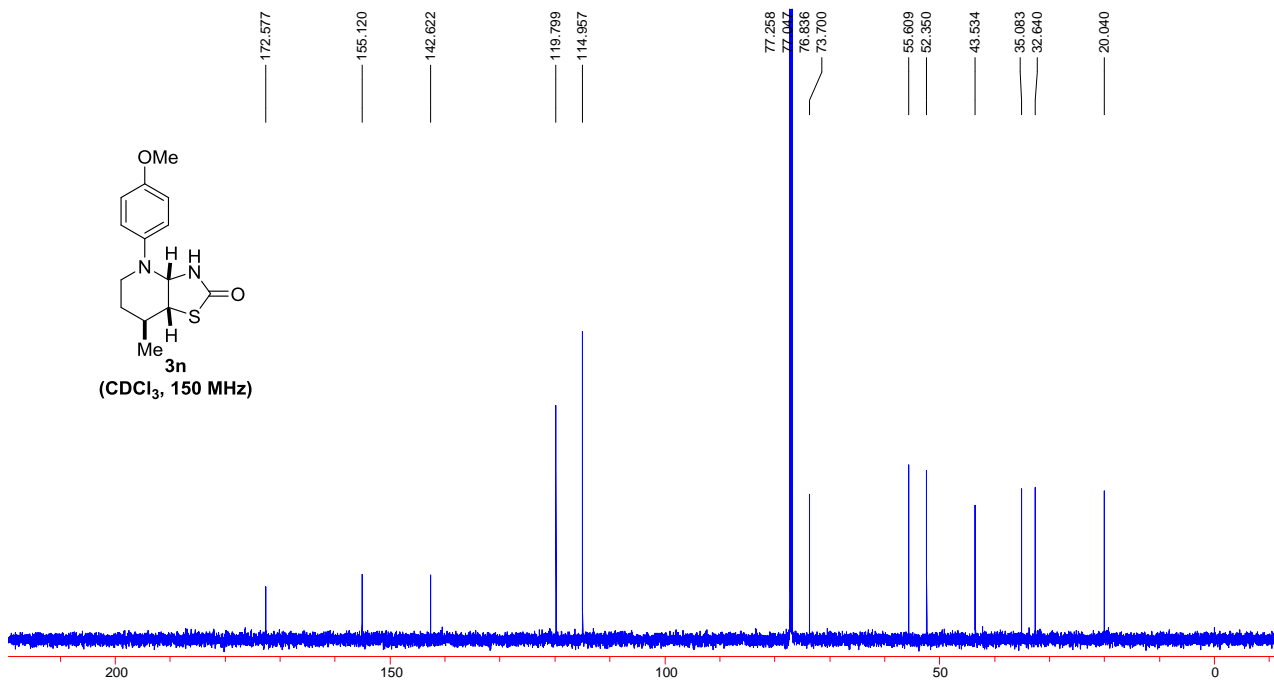

7.261  
7.019  
7.013  
7.001  
6.986  
6.986  
6.981  
6.975  
6.865  
6.601  
6.595  
6.591  
6.585  
6.579  
6.574  
6.568  
6.340  
5.666  
5.648  
4.475  
4.465  
4.457  
4.447  
4.439  
4.429  
3.627  
3.610  
3.605  
3.589  
3.584  
3.568  
3.444  
3.434  
3.426  
3.422  
3.417  
3.412  
3.403  
3.394  
2.854  
2.540  
2.535  
2.521  
2.502  
2.299  
2.292  
2.289  
2.283  
2.274  
2.266  
2.230  
-0.000

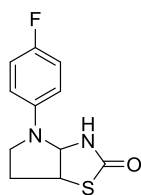

**3o**  
(CDCl<sub>3</sub>, 400 MHz)

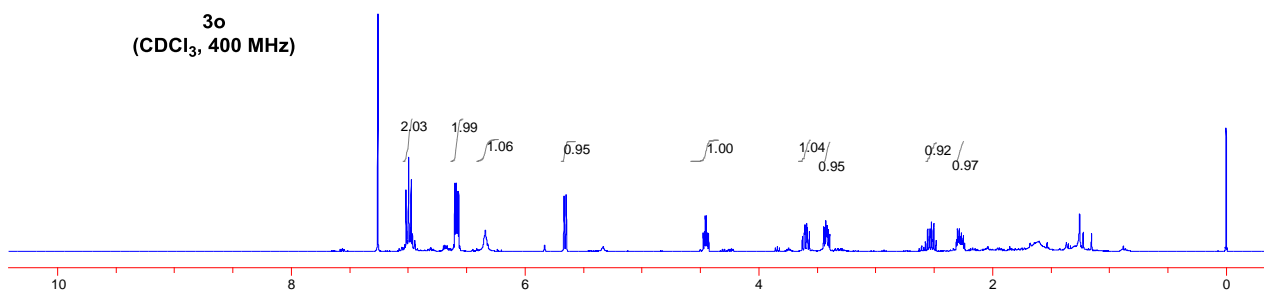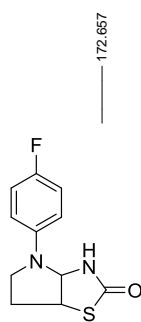

**3o**  
(CDCl<sub>3</sub>, 150 MHz)

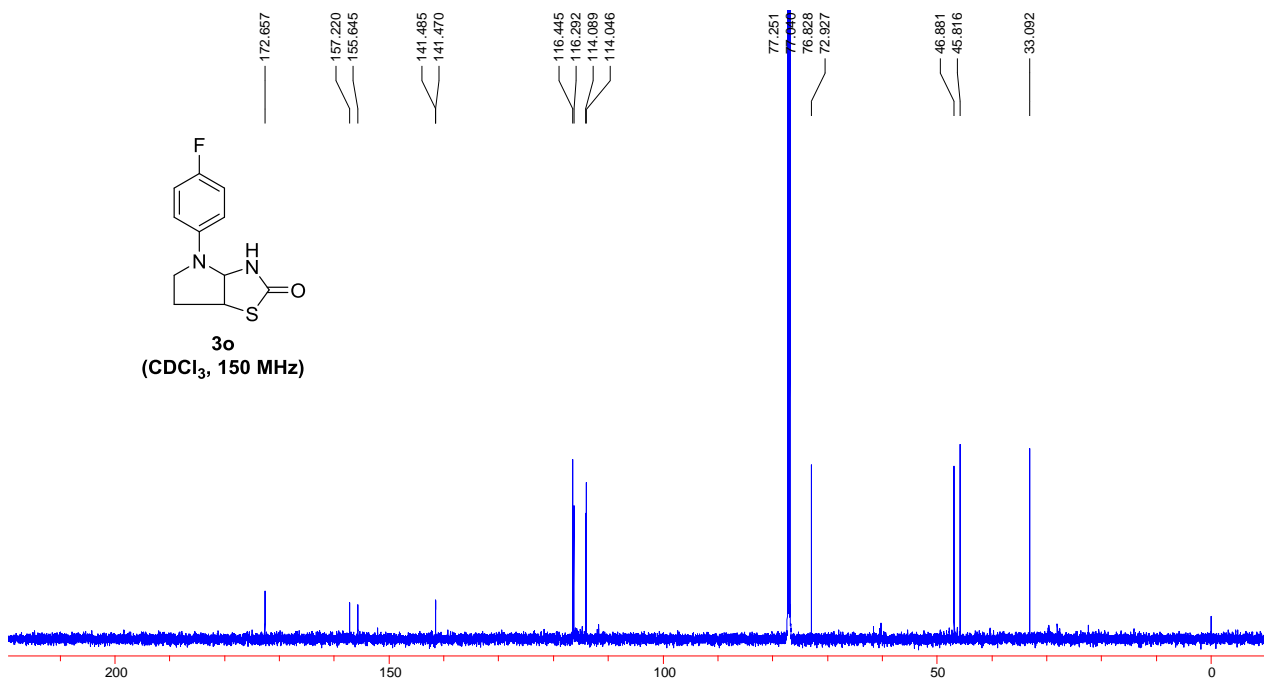



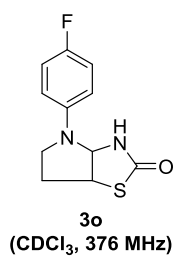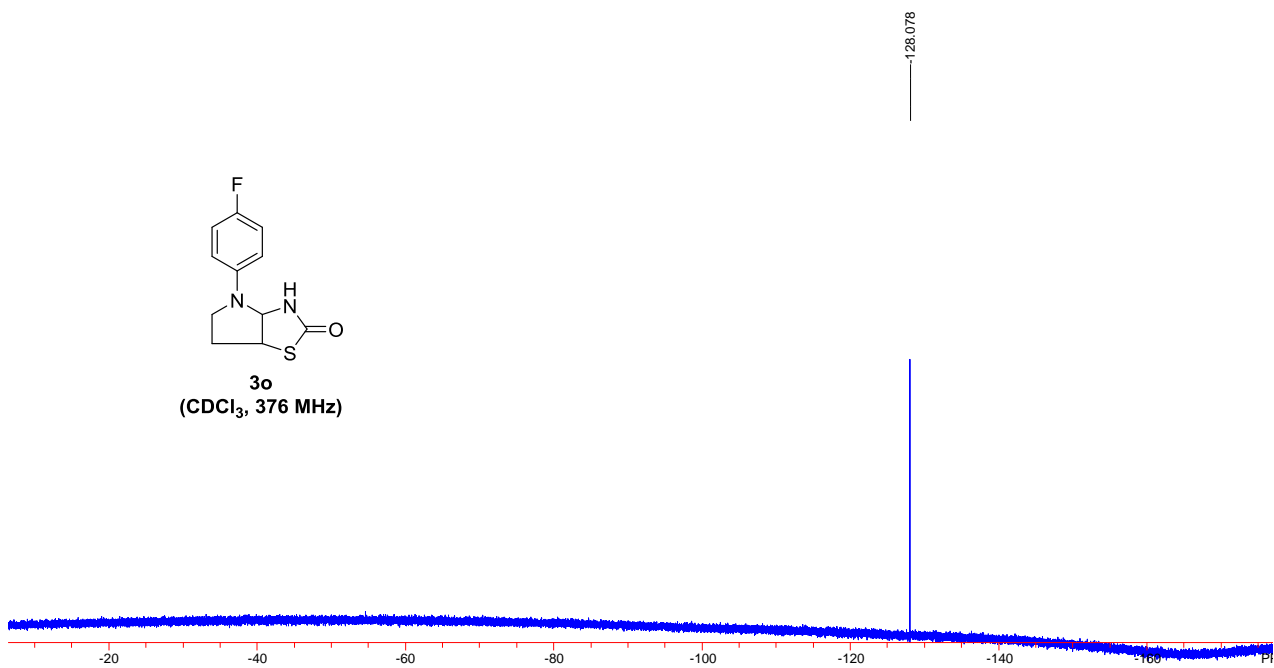

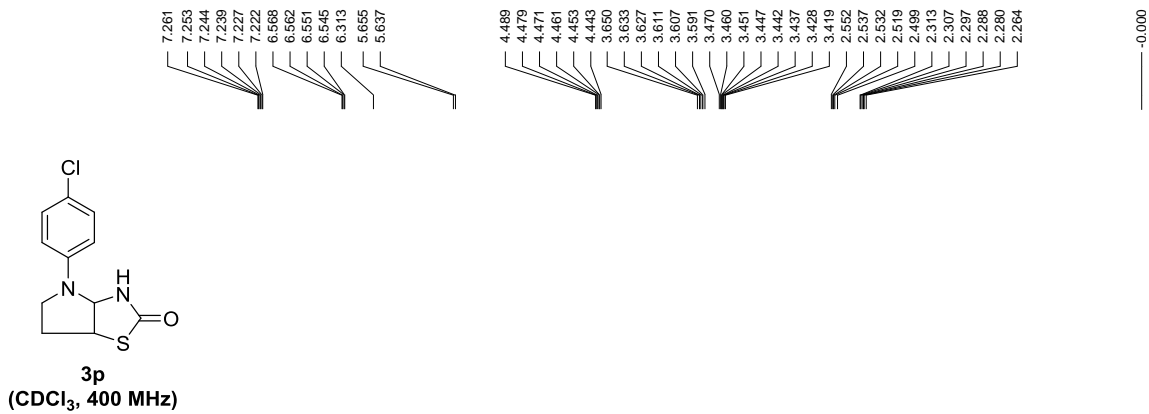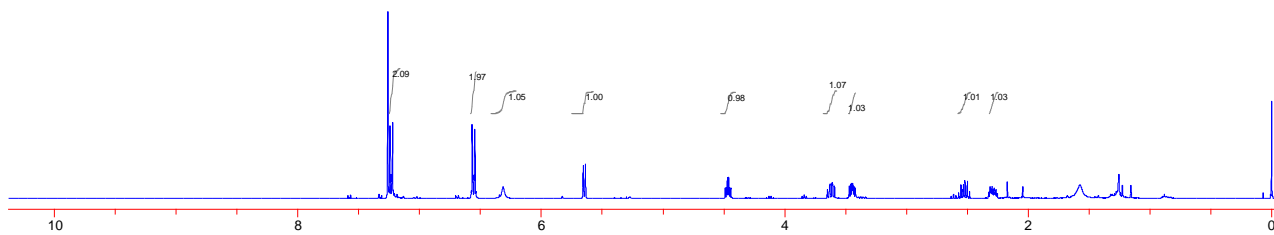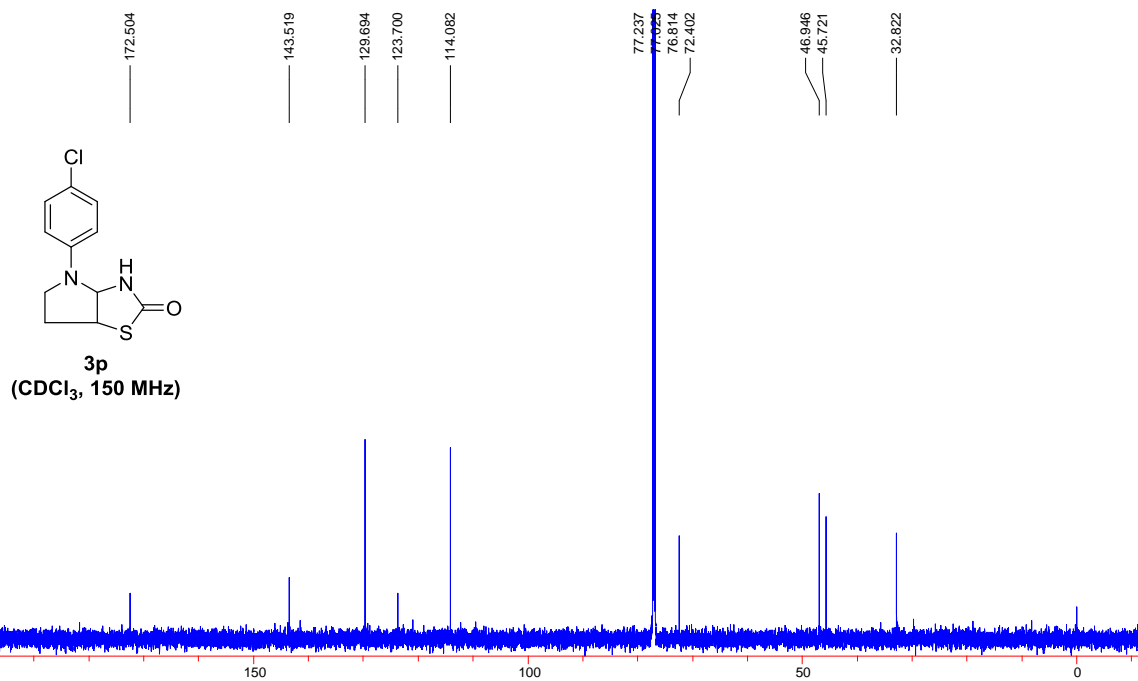

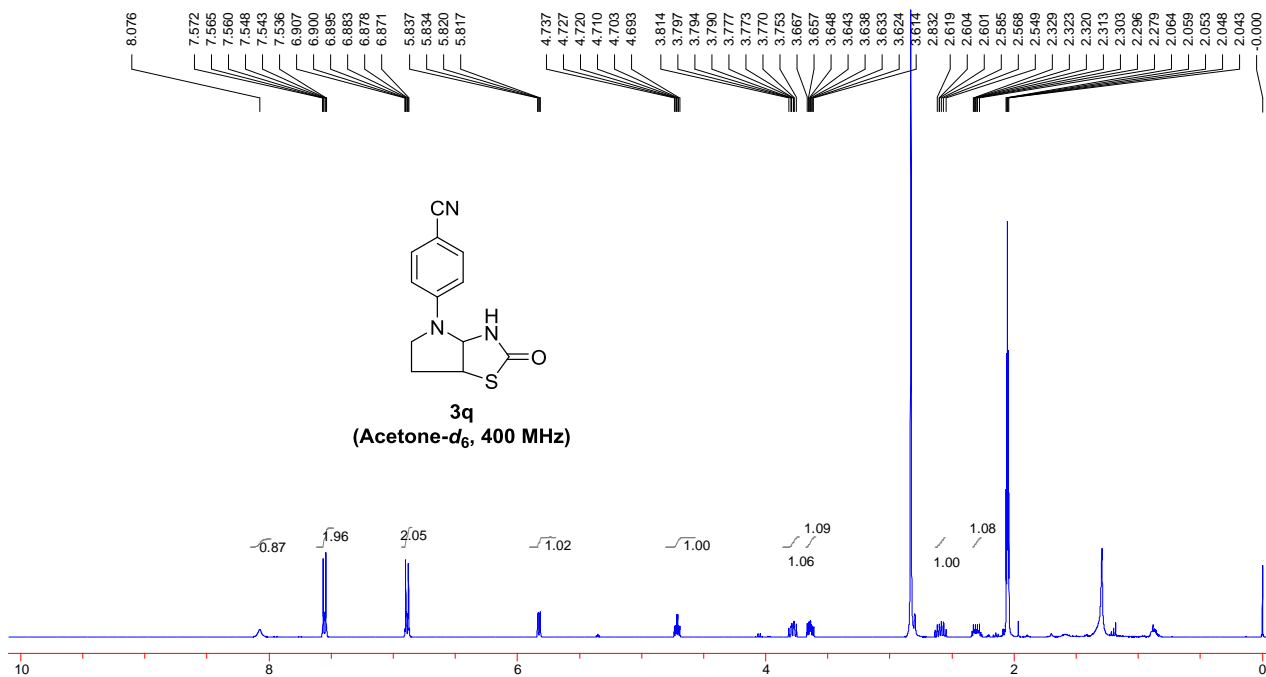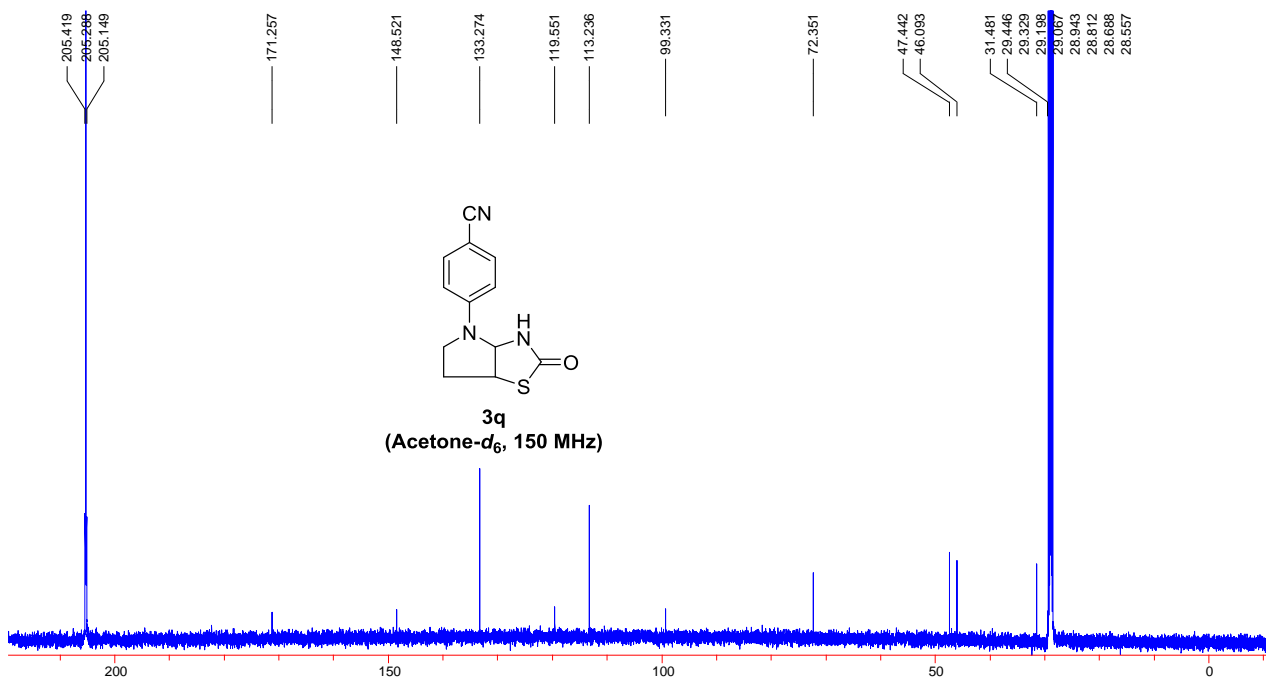

## IV. Copies of the NMR spectra of 5a-5s

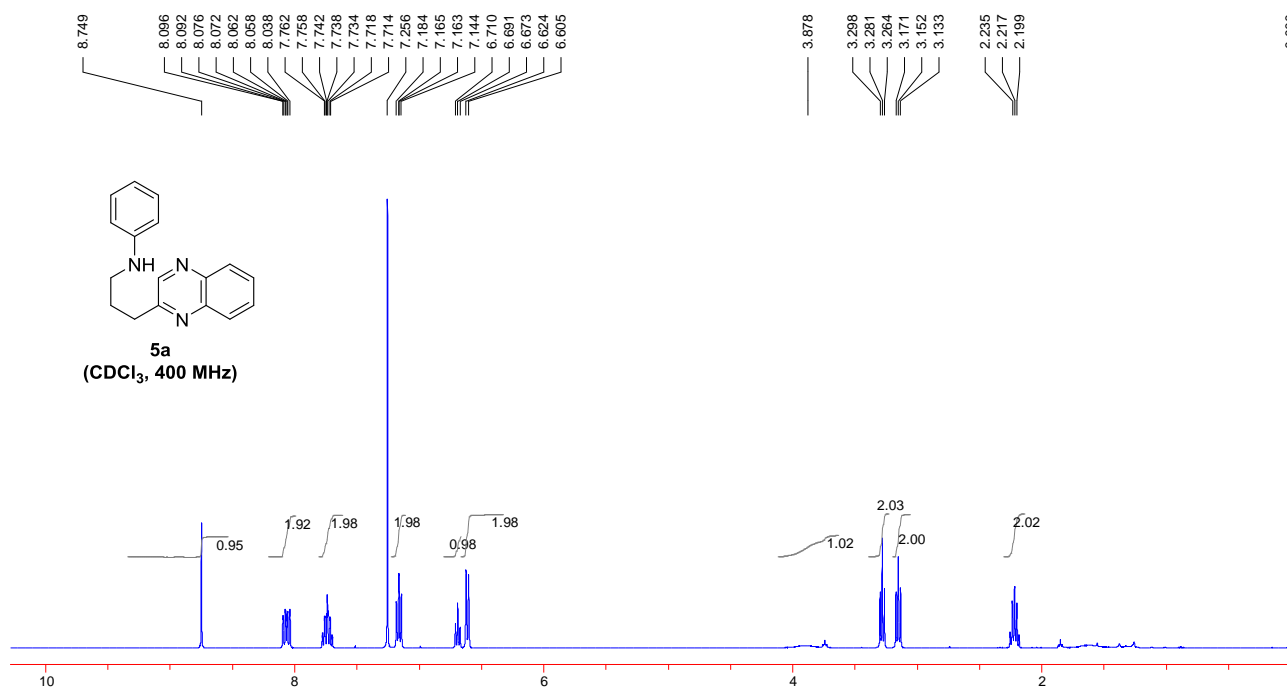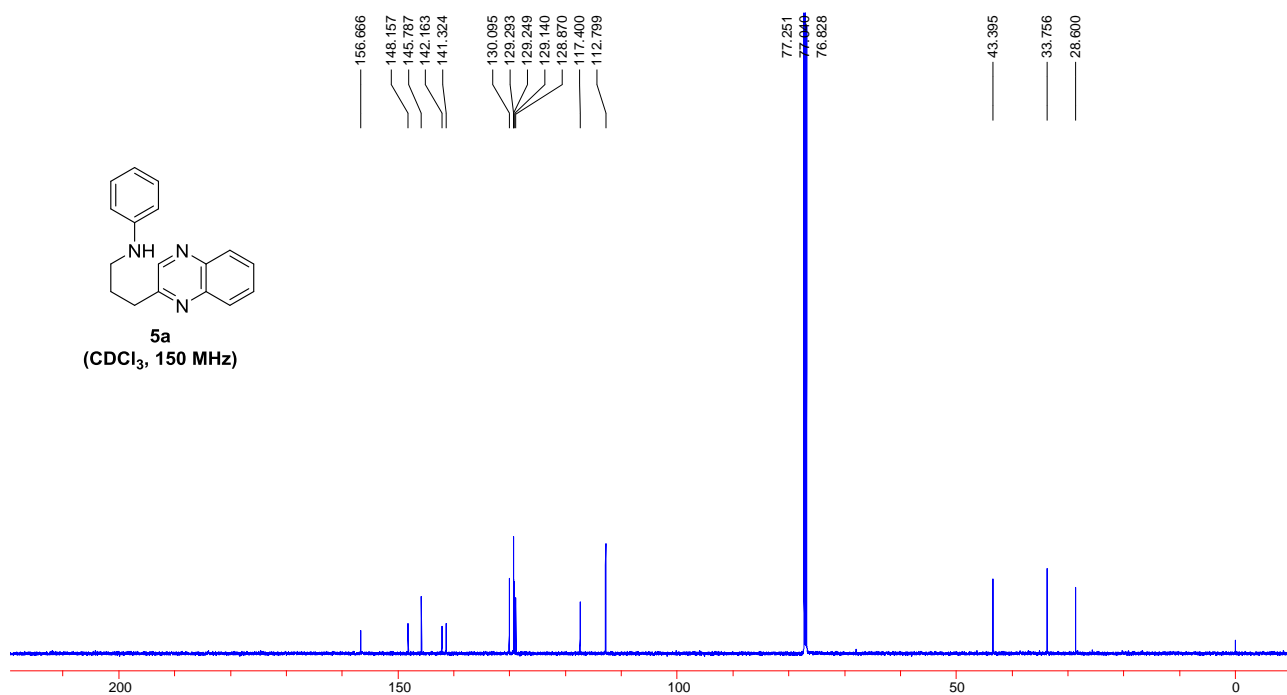

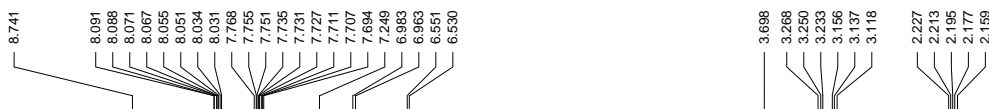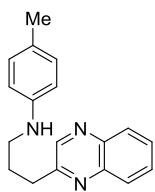

**5b**  
(CDCl<sub>3</sub>, 400 MHz)

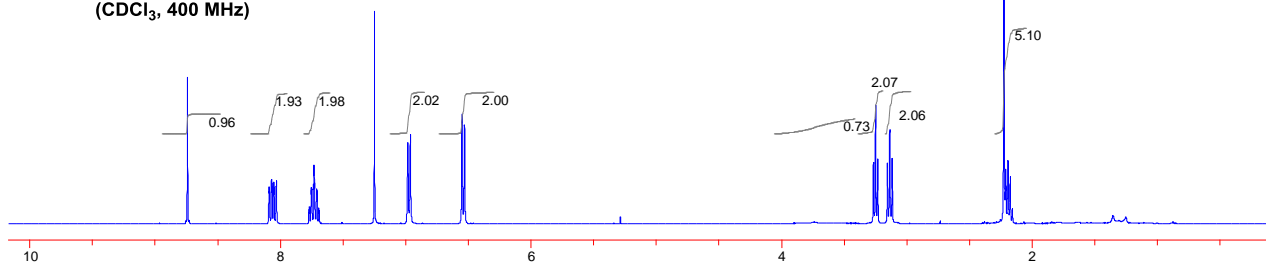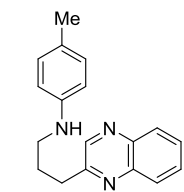

**5b**  
(CDCl<sub>3</sub>, 150 MHz)

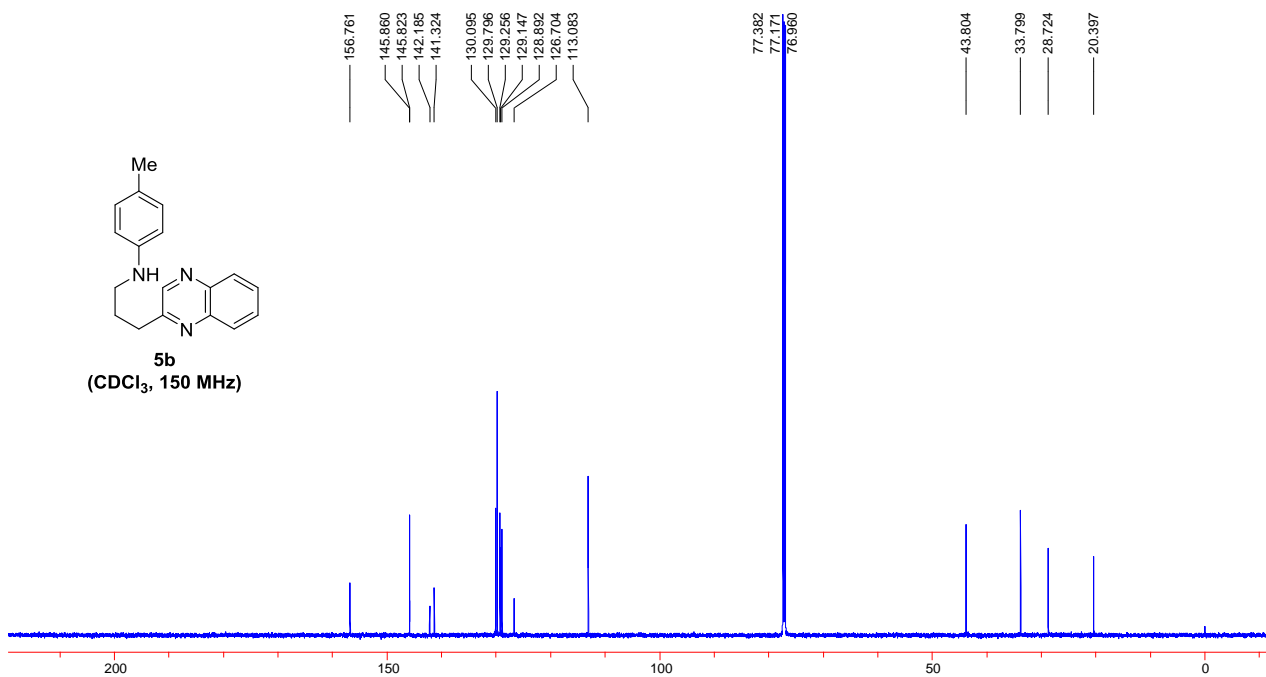

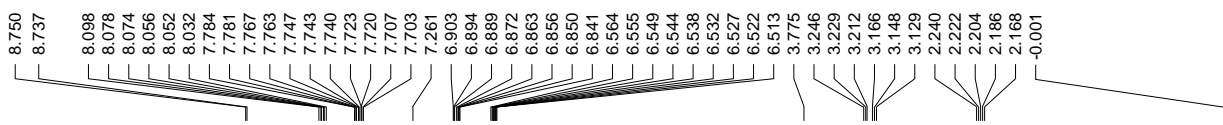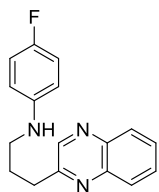

**5c**  
(CDCl<sub>3</sub>, 400 MHz)

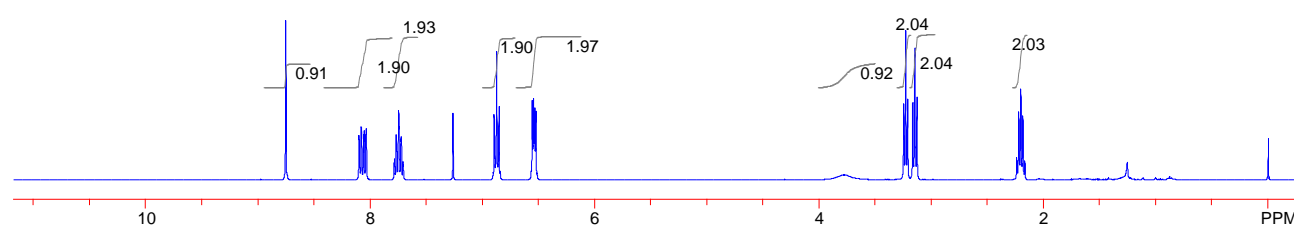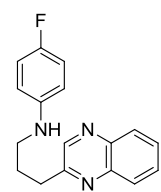

**5c**  
(CDCl<sub>3</sub>, 100 MHz)

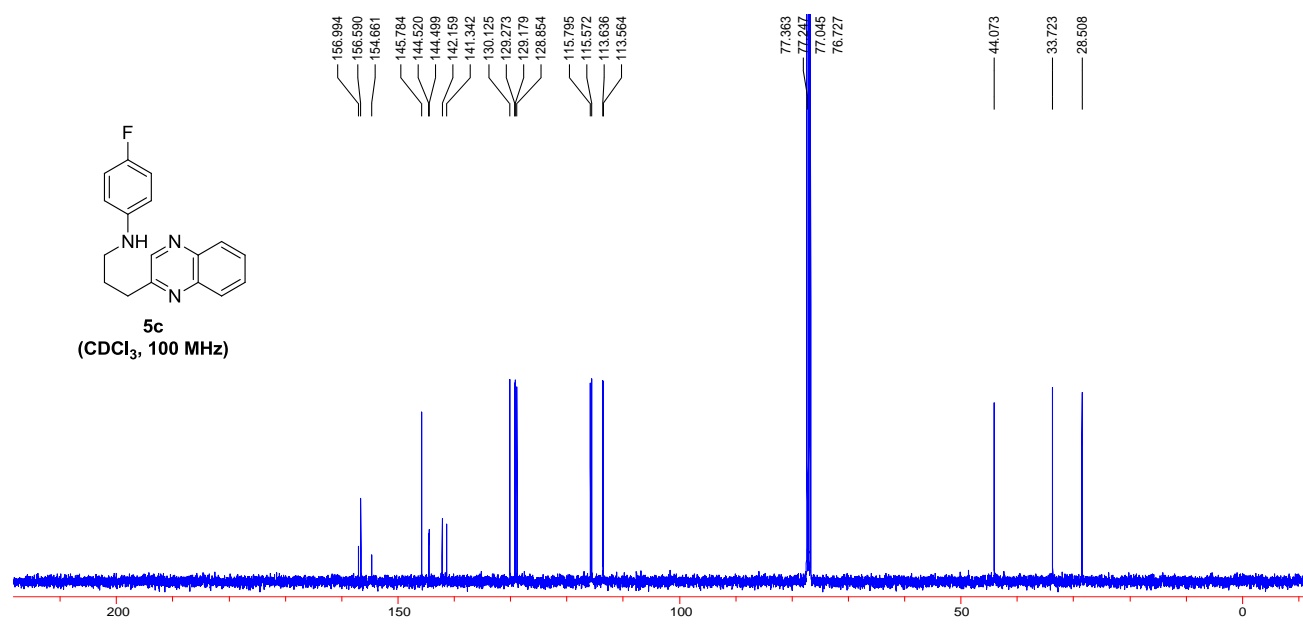

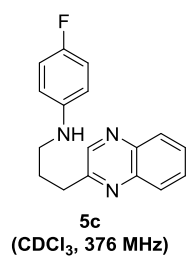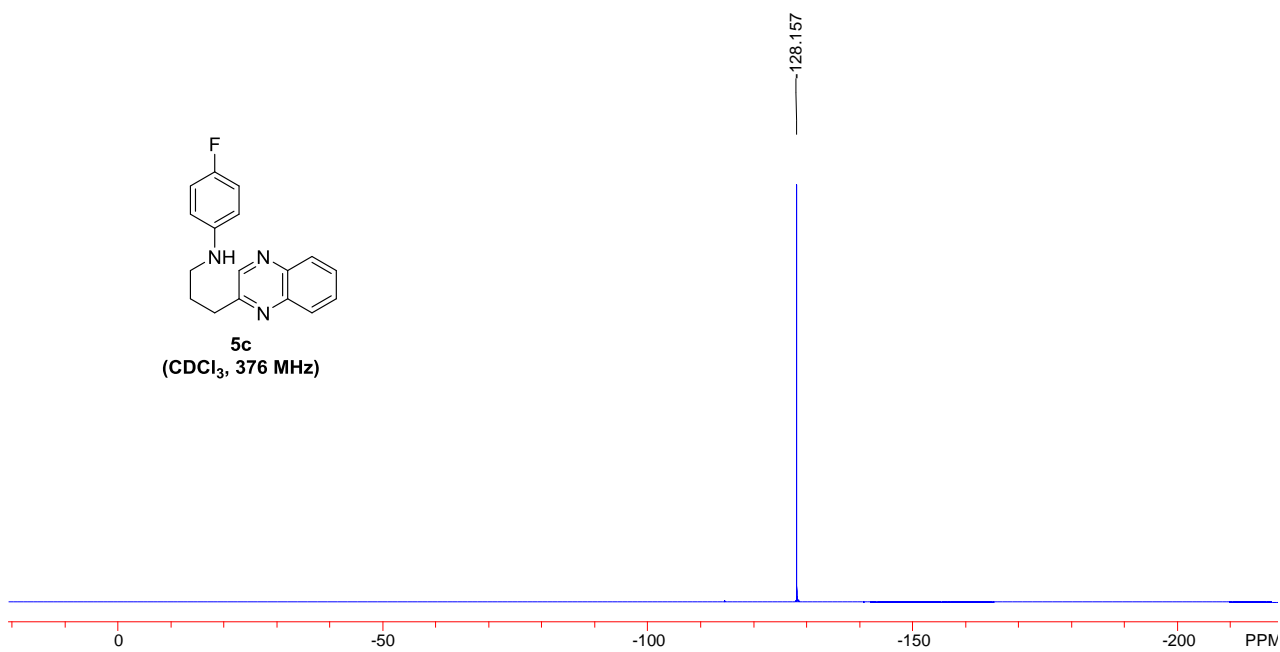

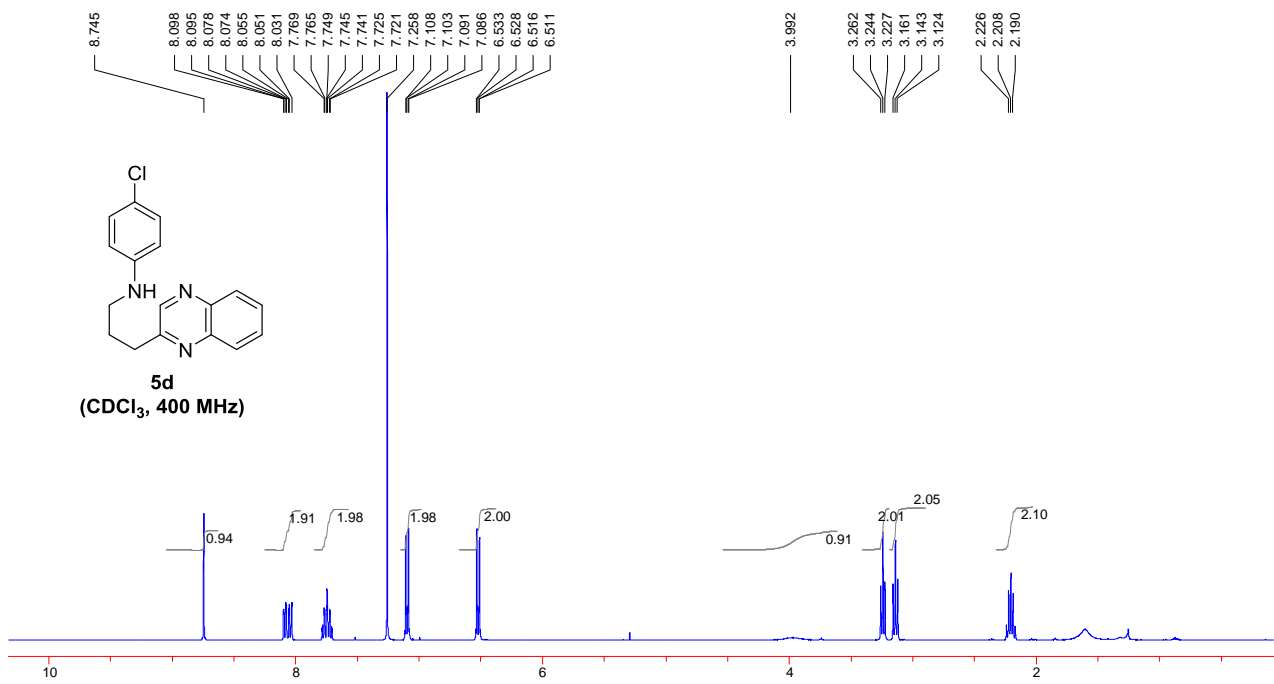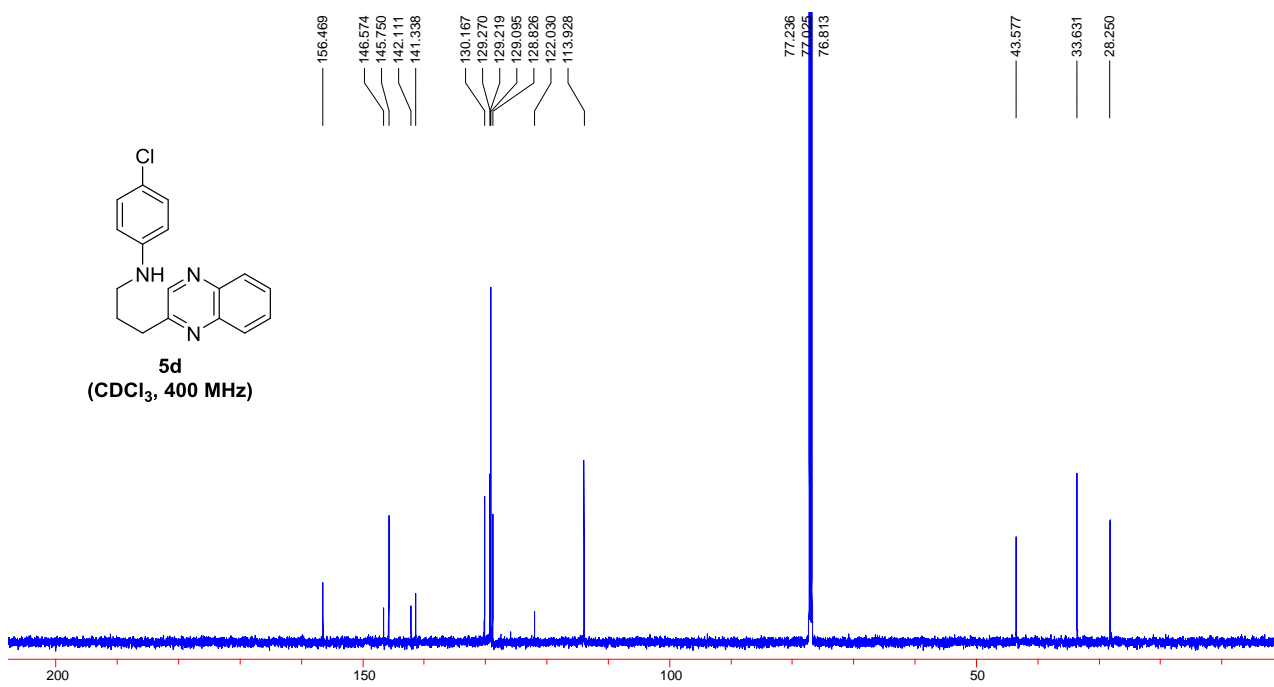



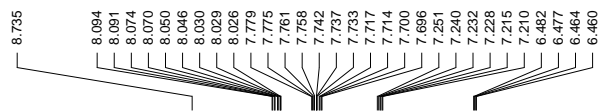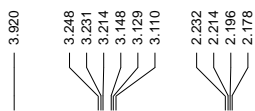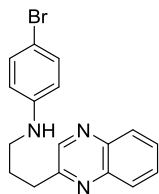

**5e**  
(CDCl<sub>3</sub>, 400 MHz)

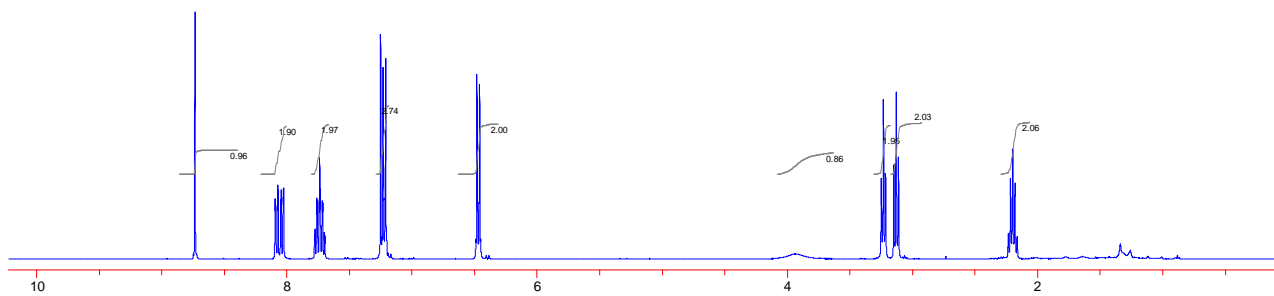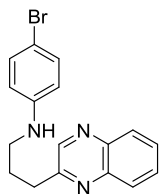

**5e**  
(CDCl<sub>3</sub>, 150 MHz)

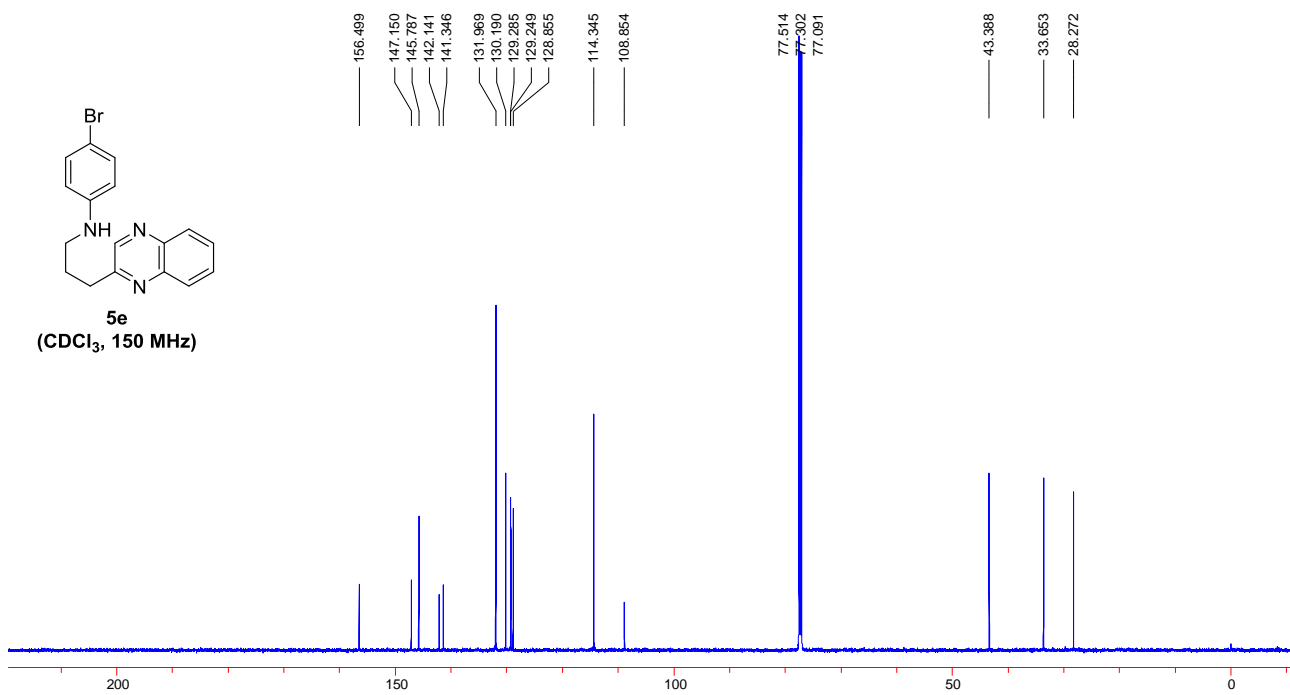

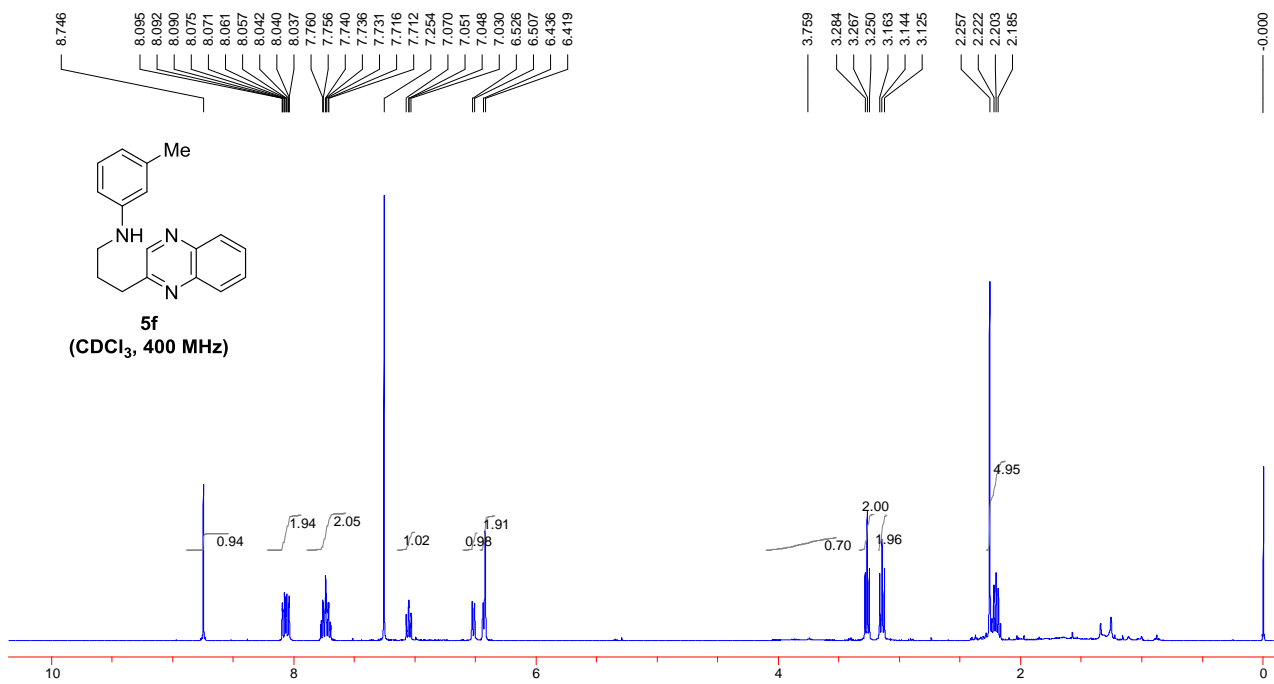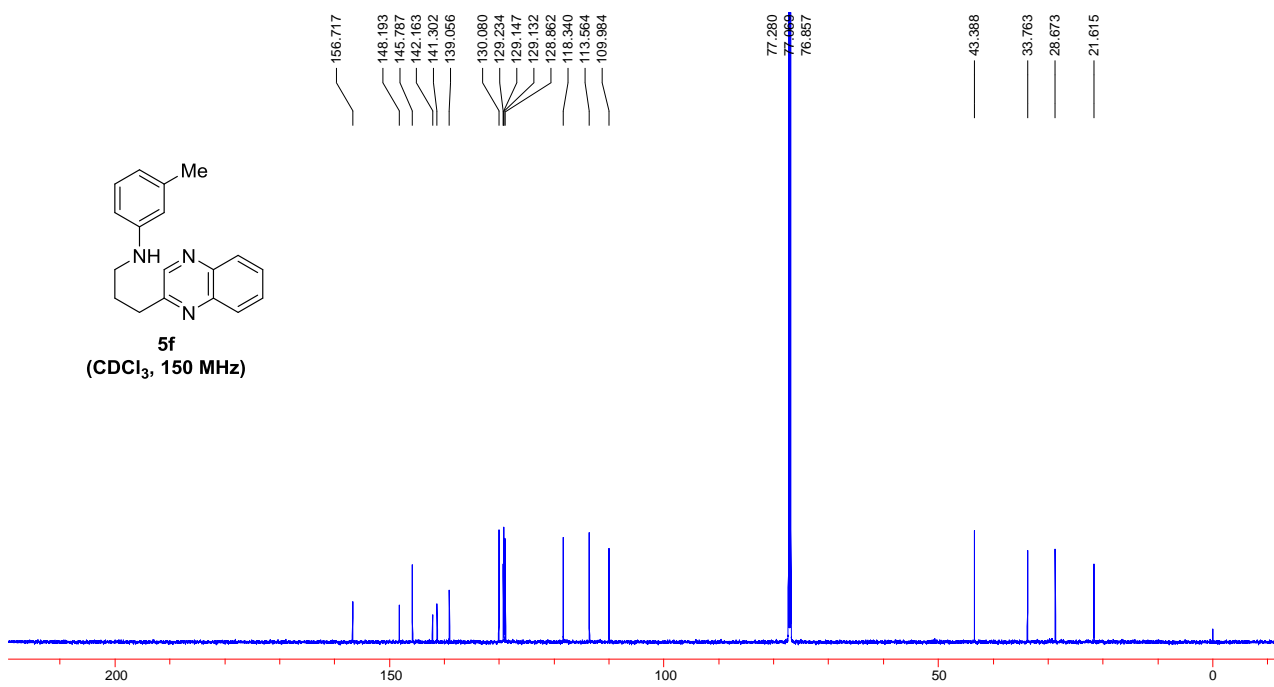

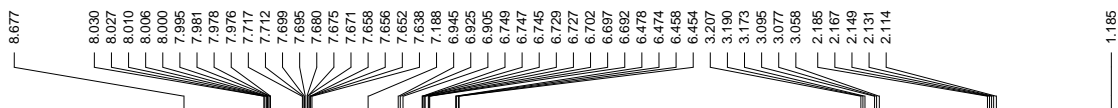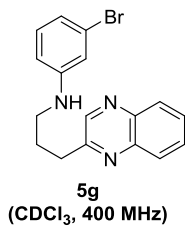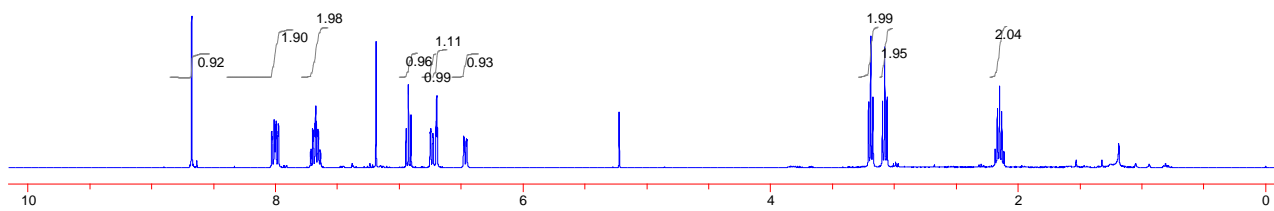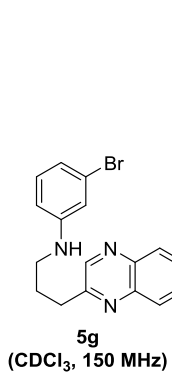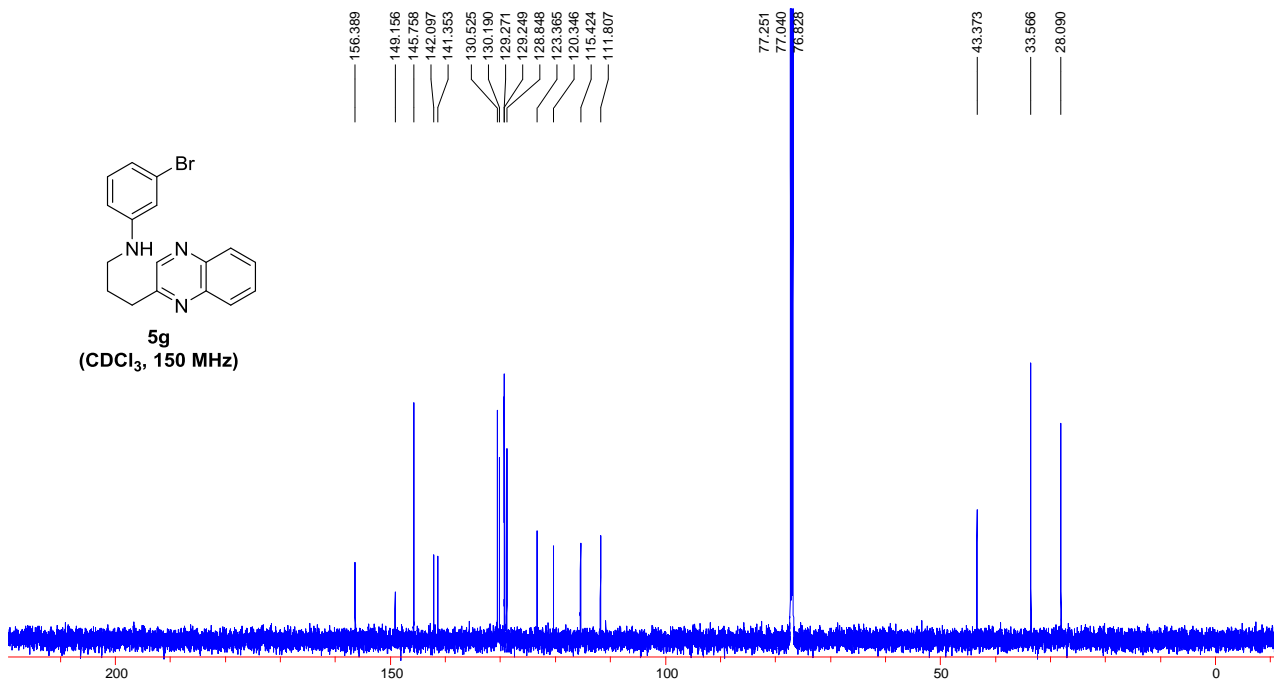

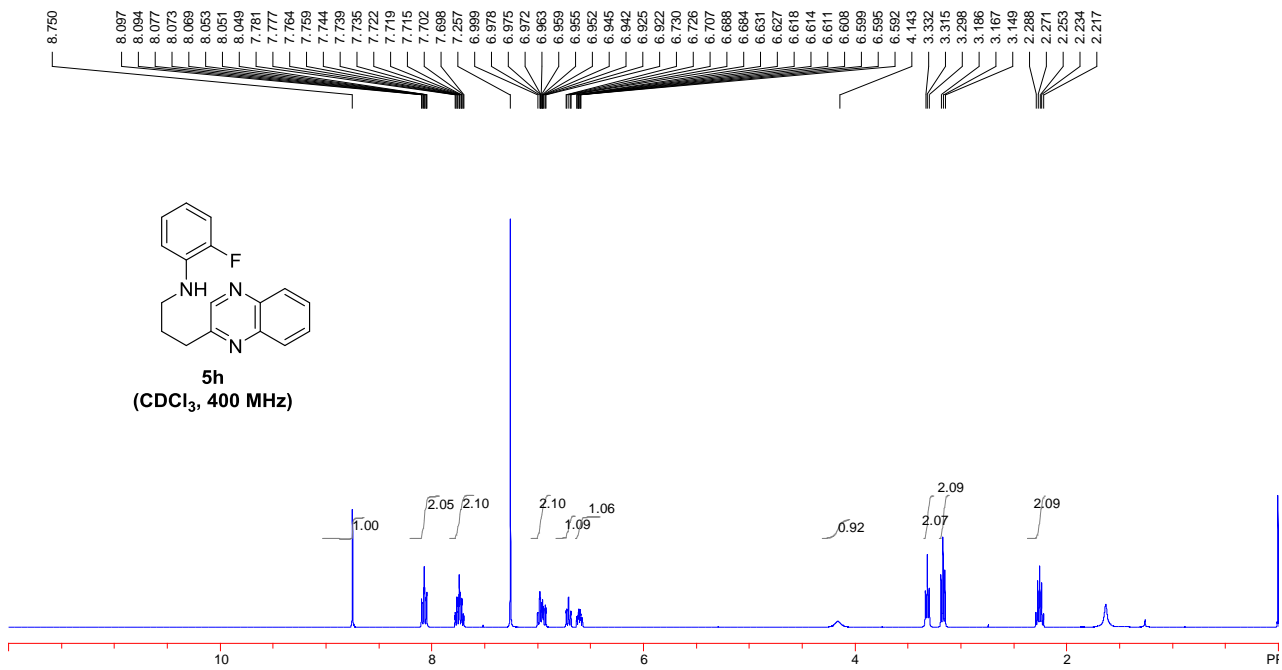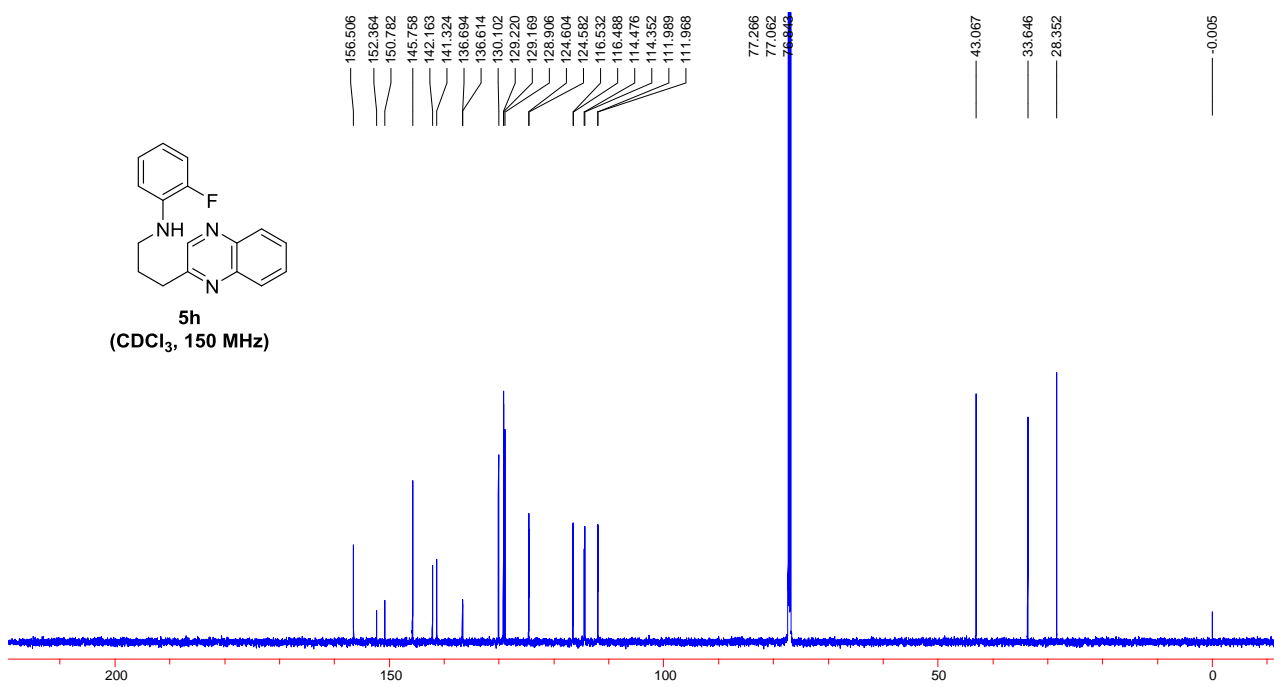

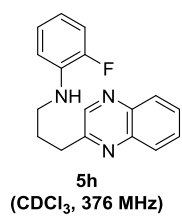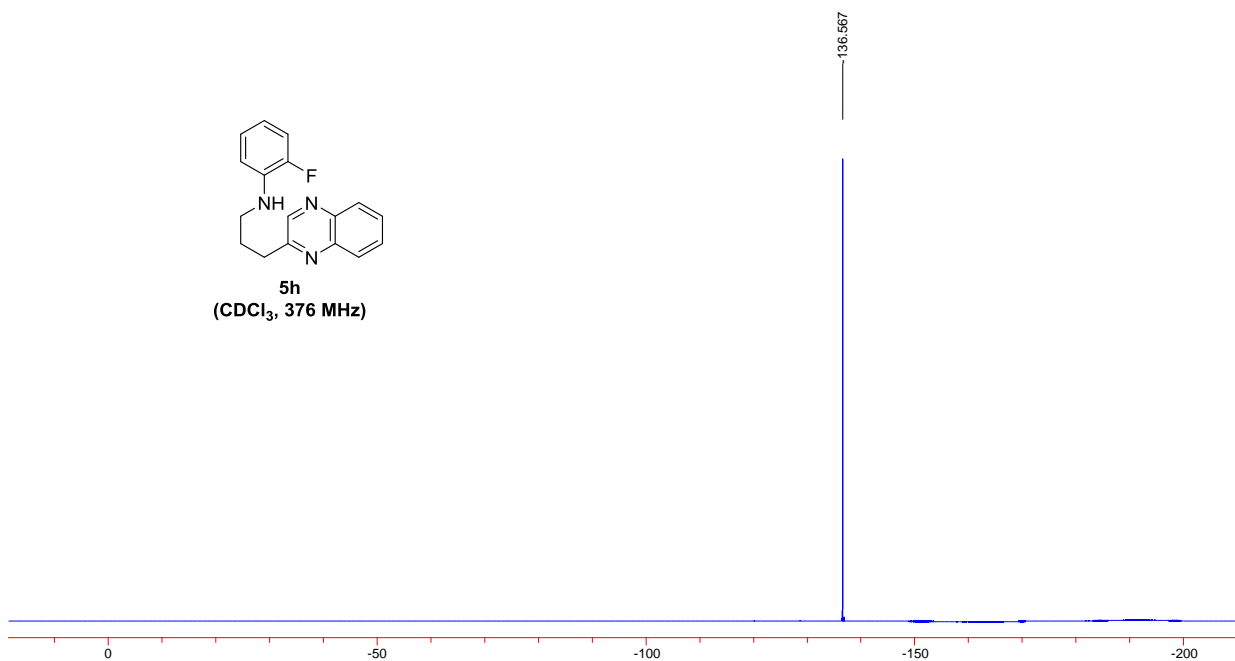

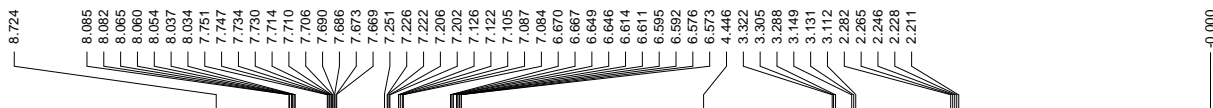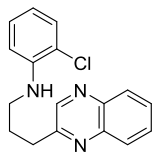

**5i**  
(CDCl<sub>3</sub>, 400 MHz)

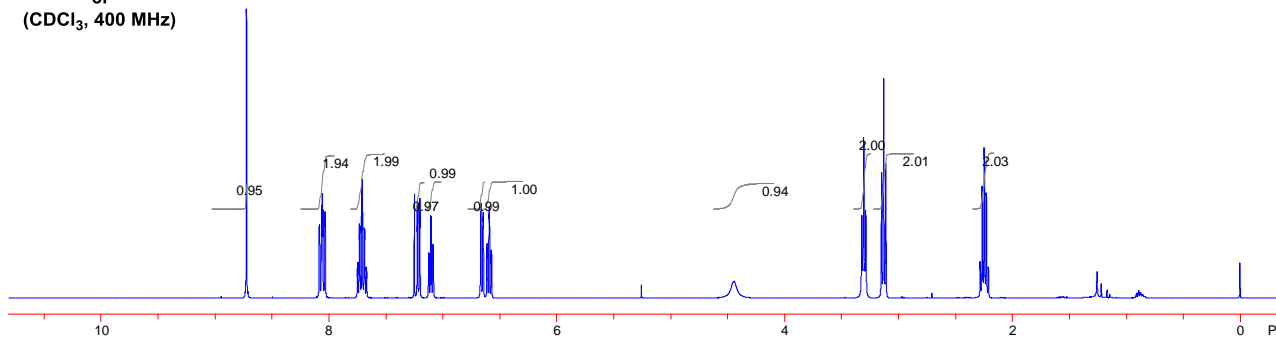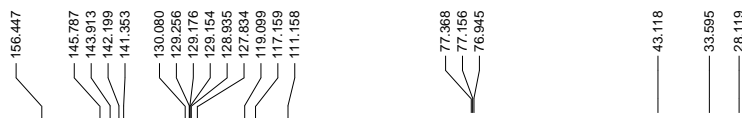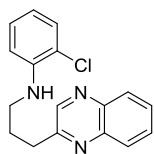

**5i**  
(CDCl<sub>3</sub>, 150 MHz)

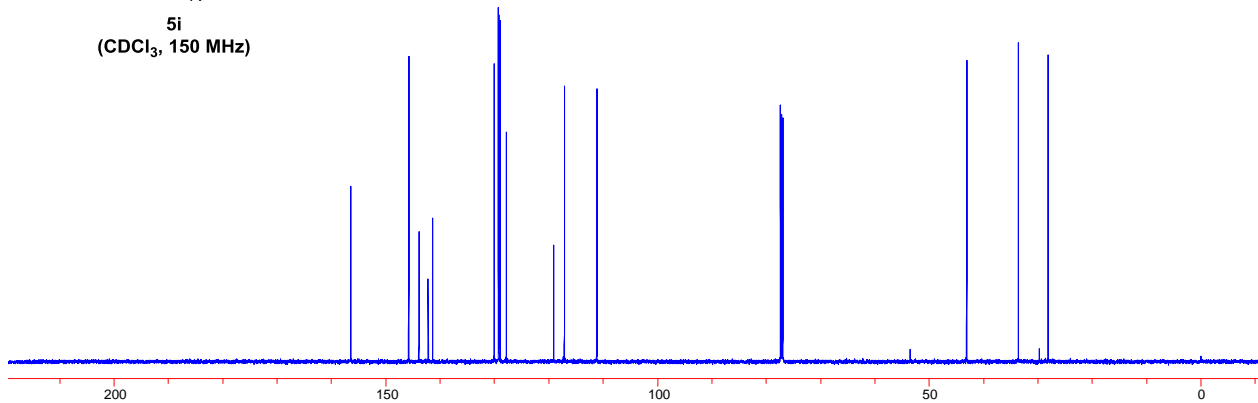

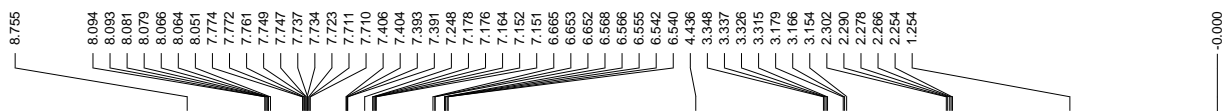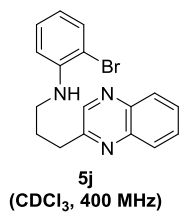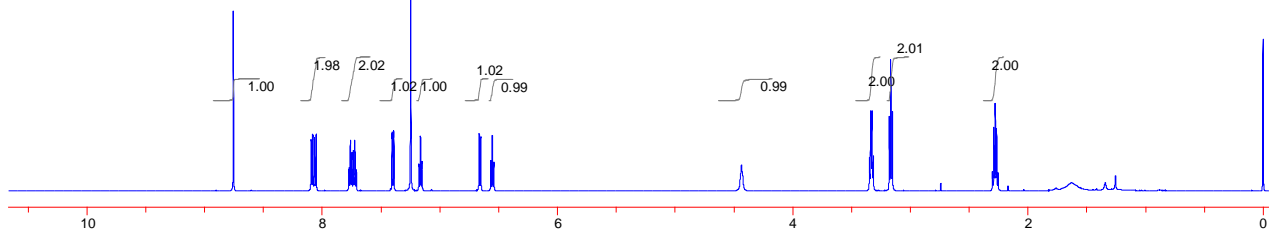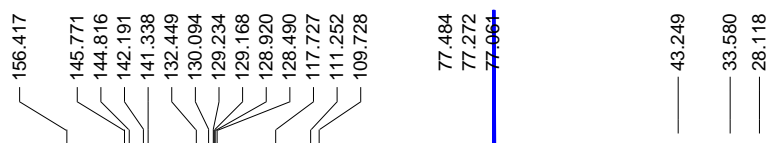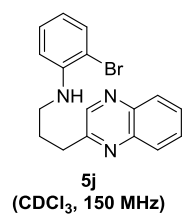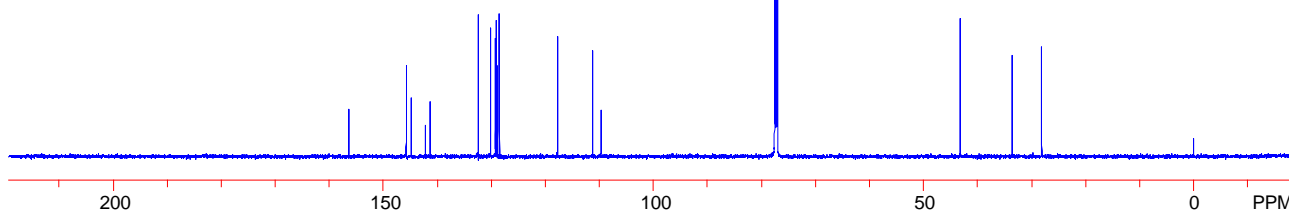

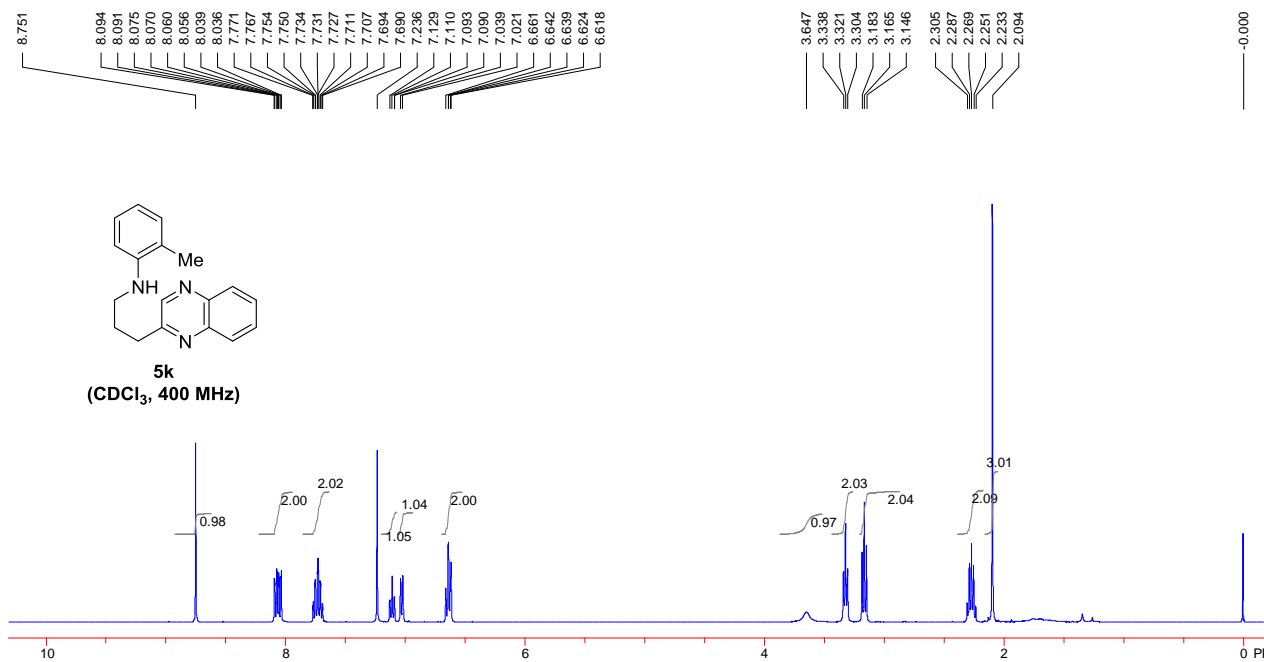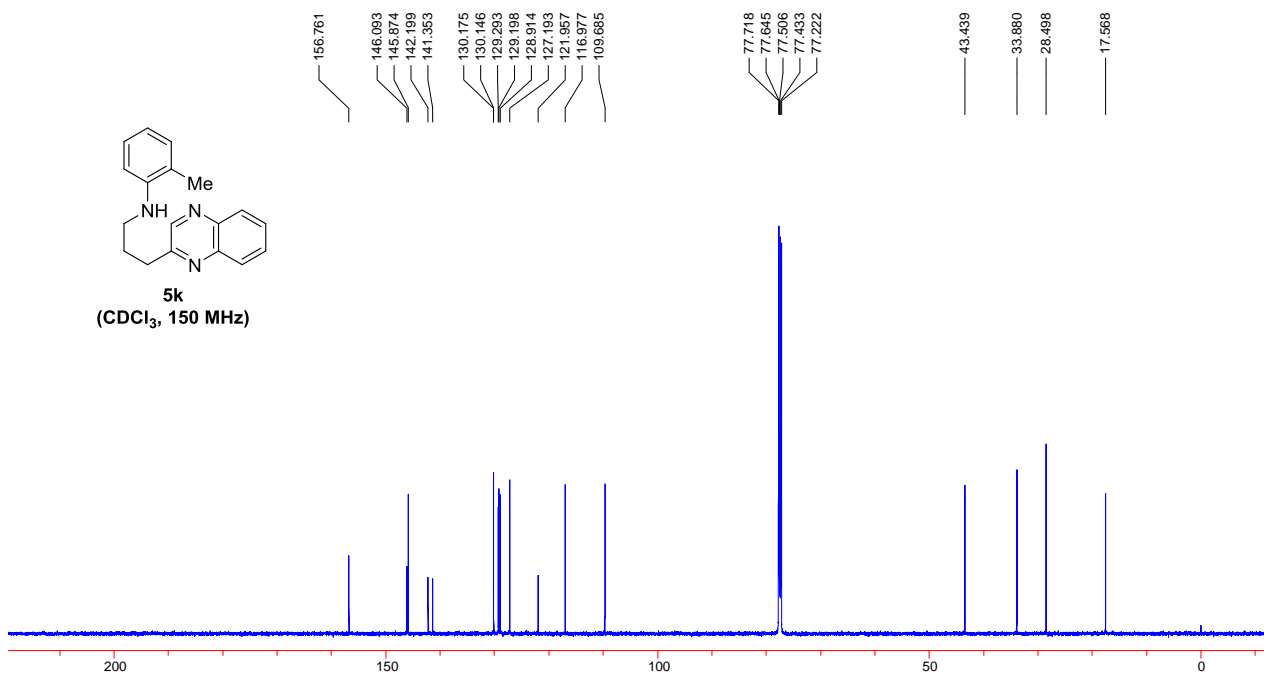



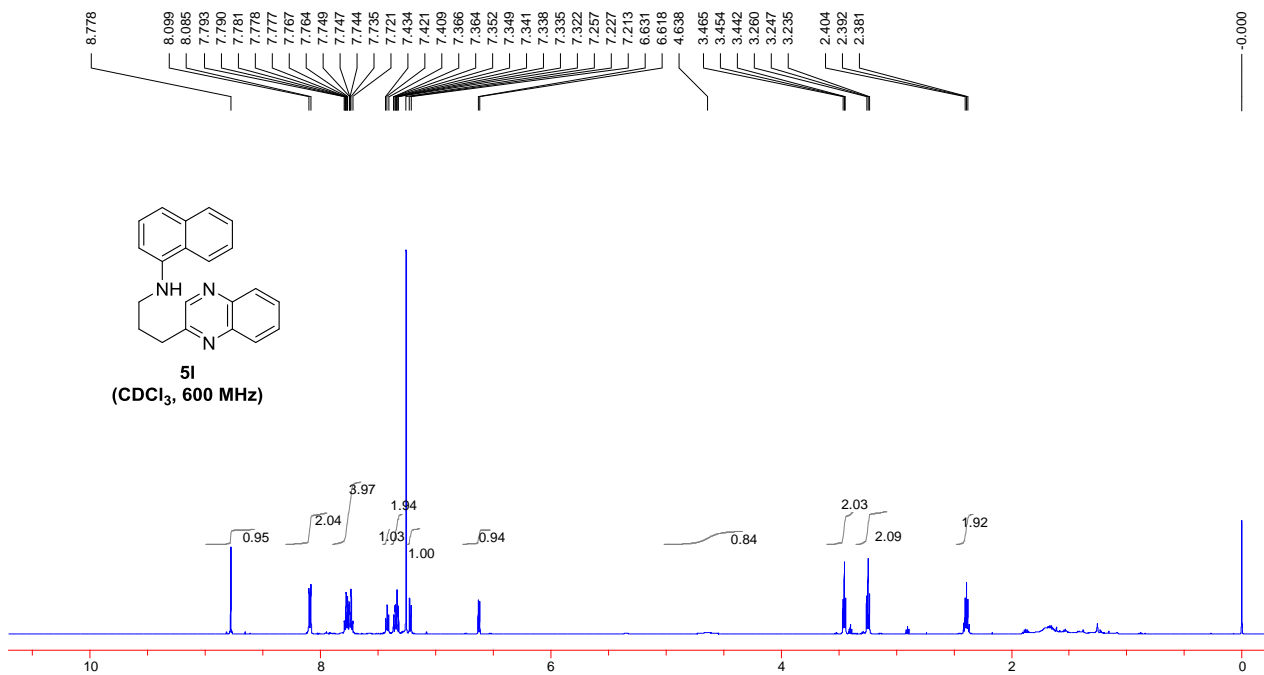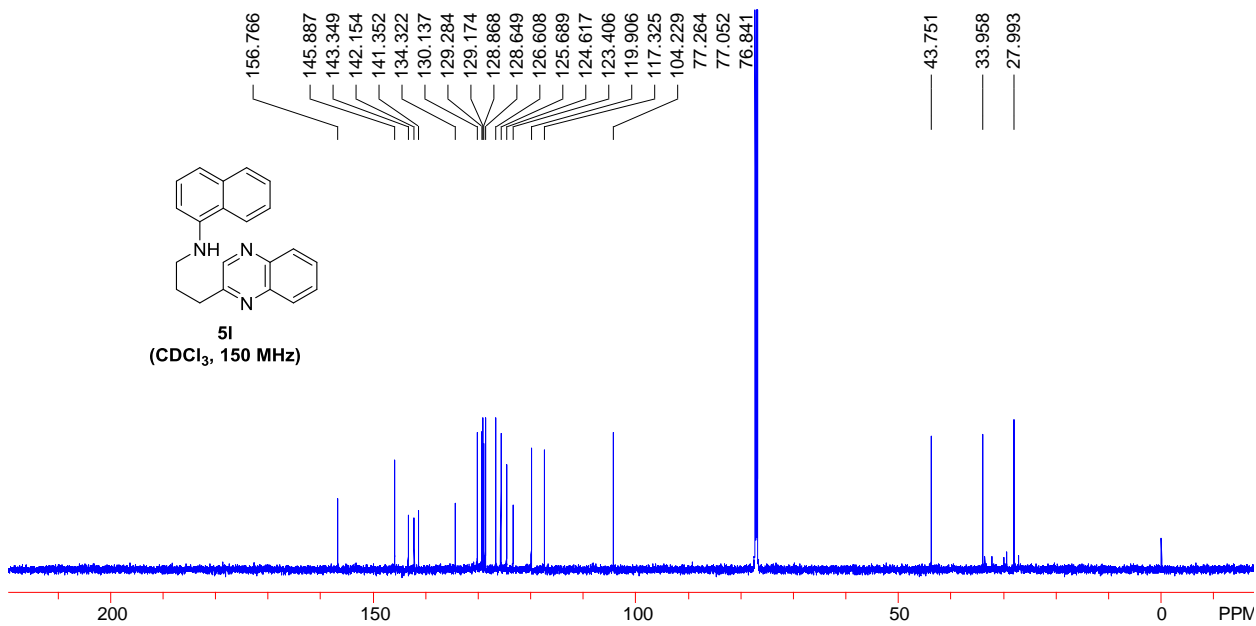

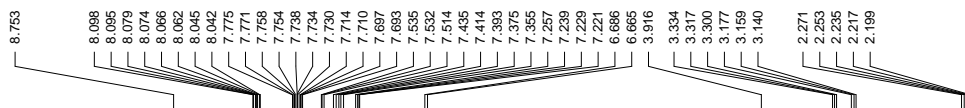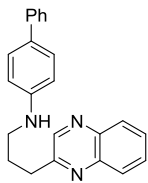

5m  
(CDCl<sub>3</sub>, 400 MHz)

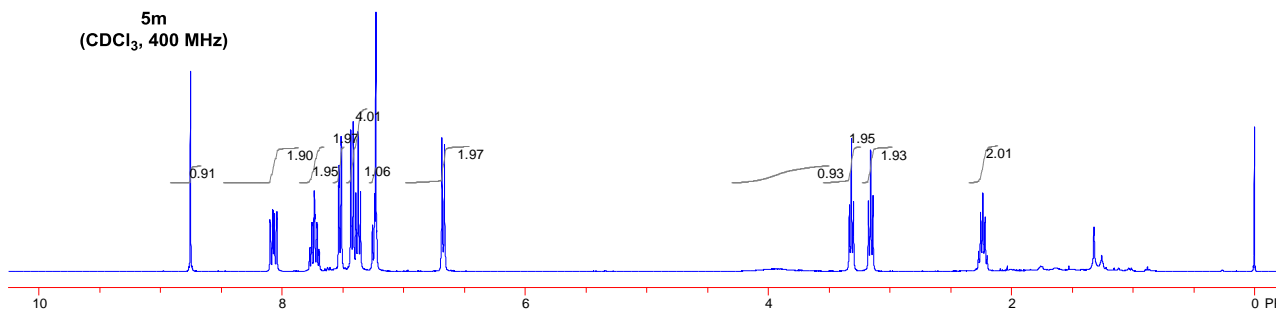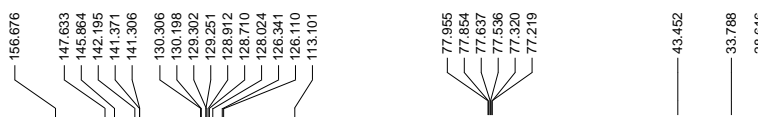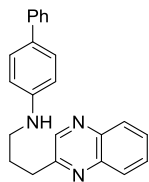

5m  
(CDCl<sub>3</sub>, 150 MHz)

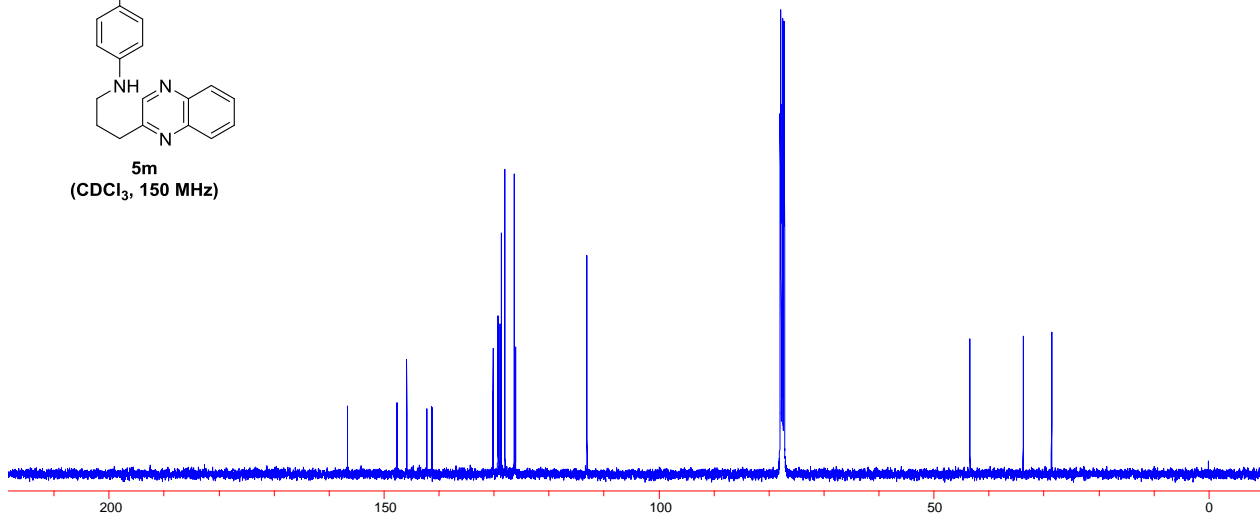

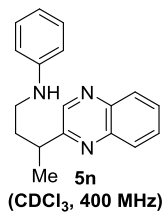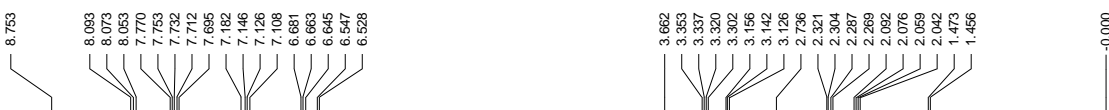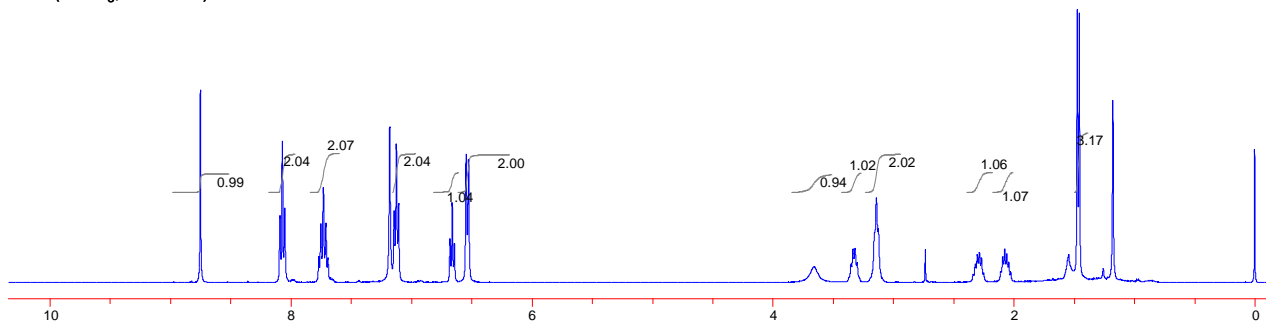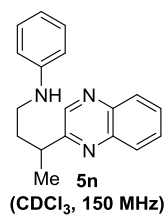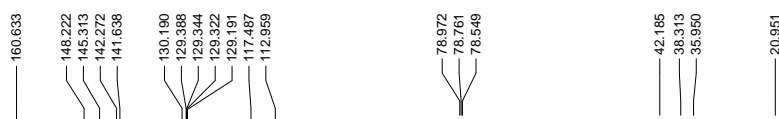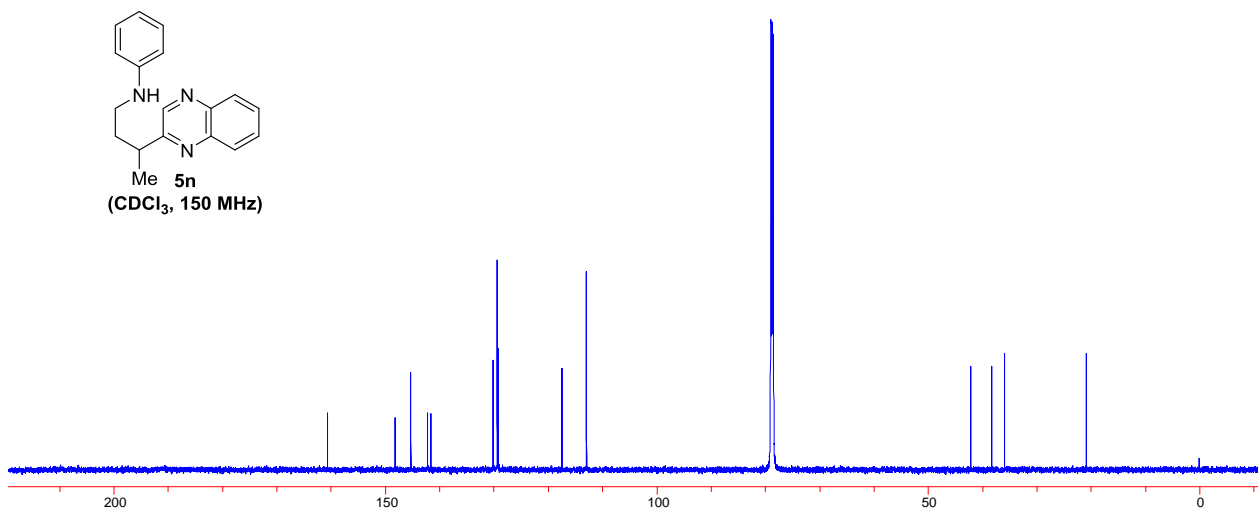

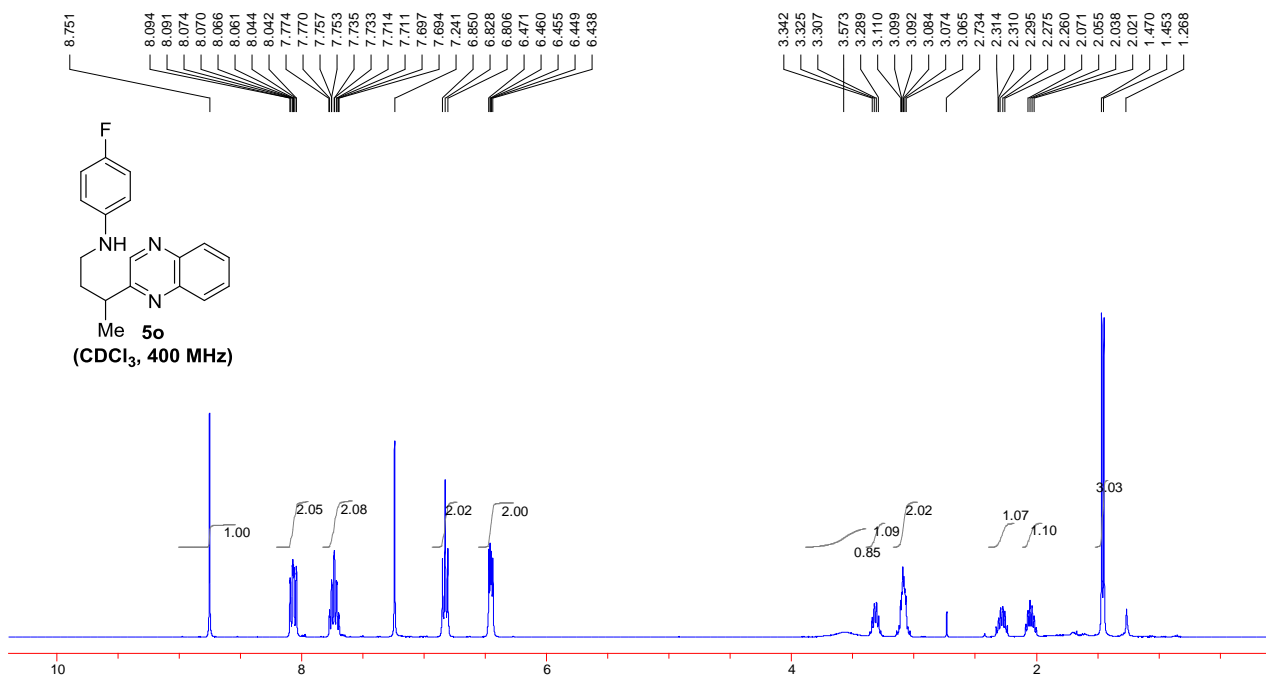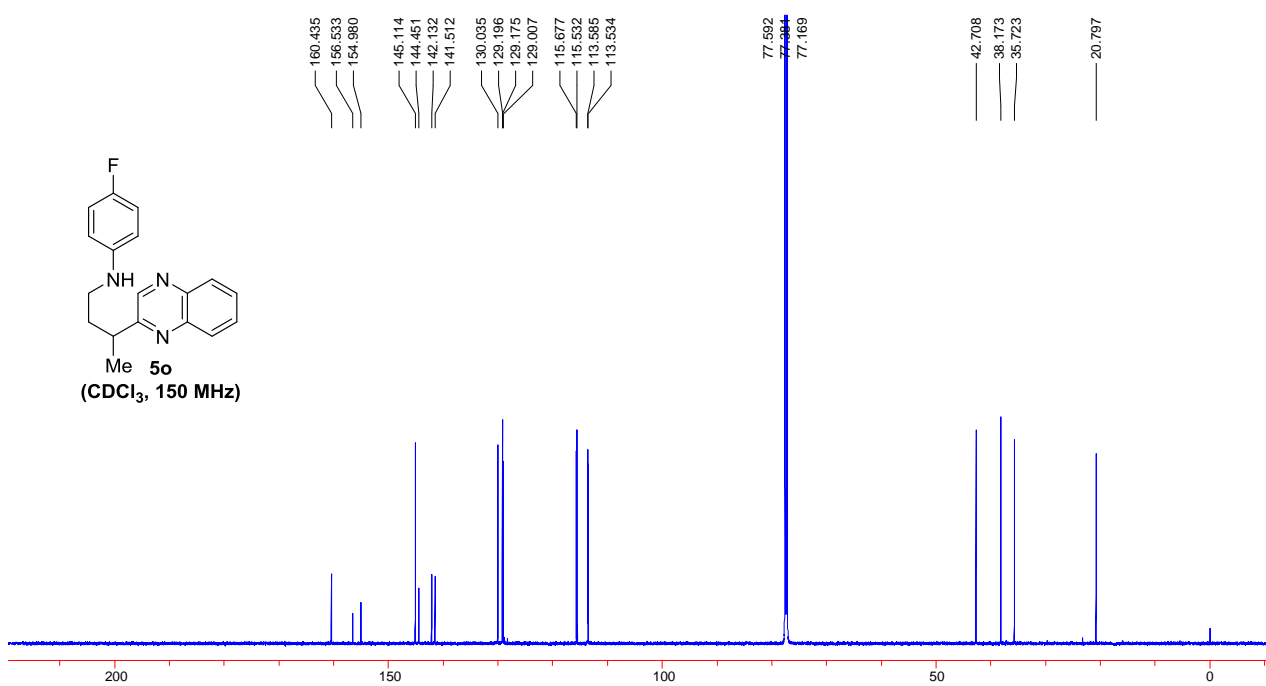

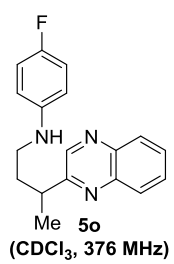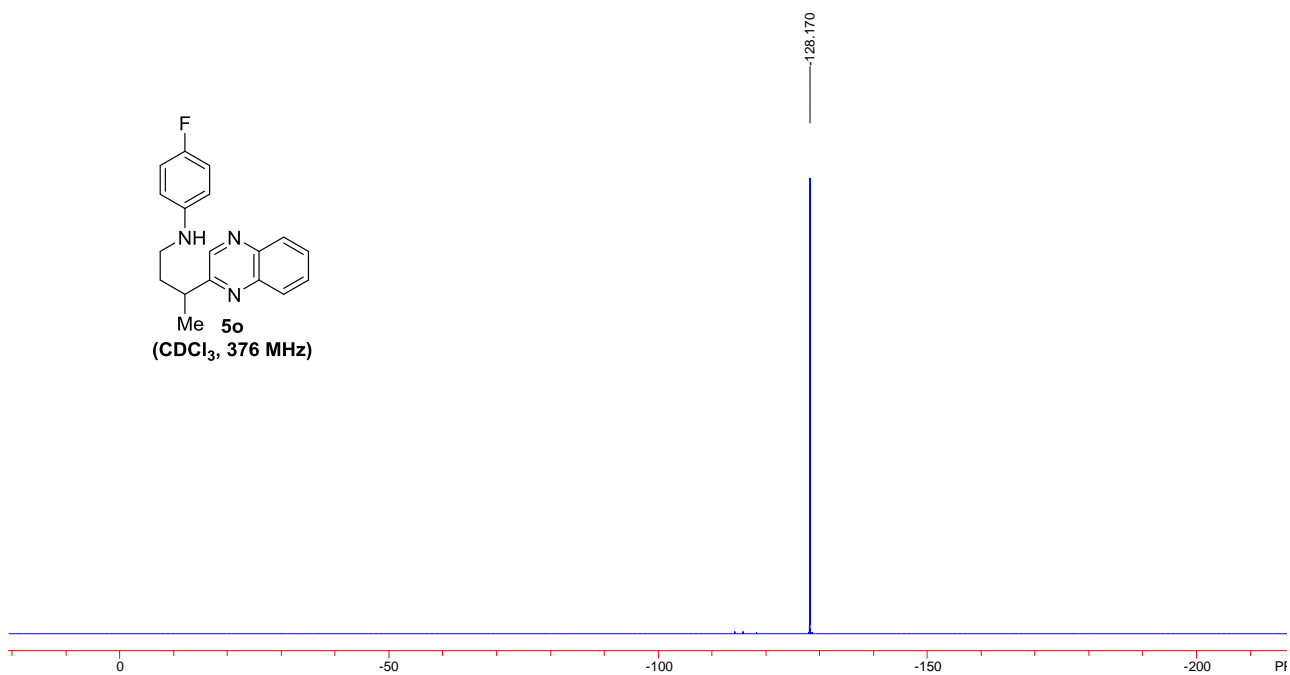

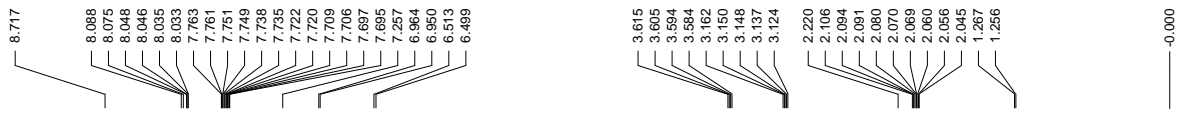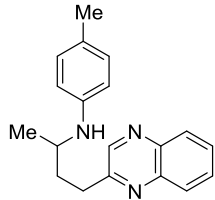

**5p**  
(CDCl<sub>3</sub>, 600 MHz)

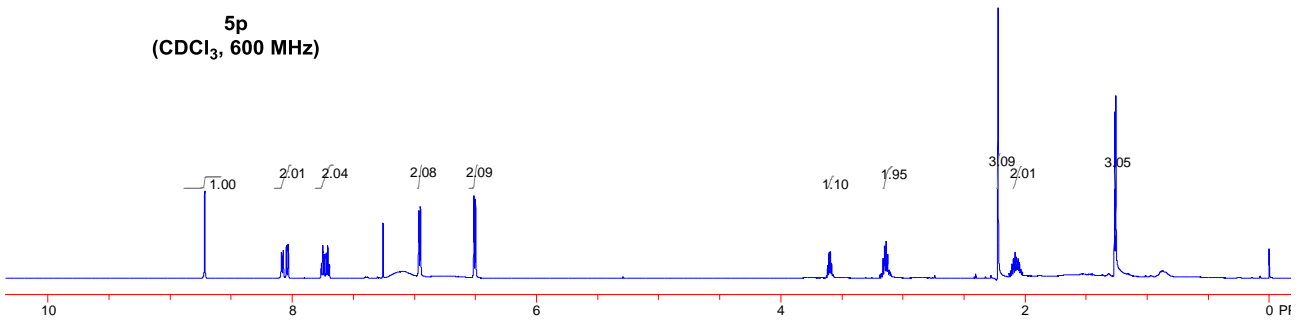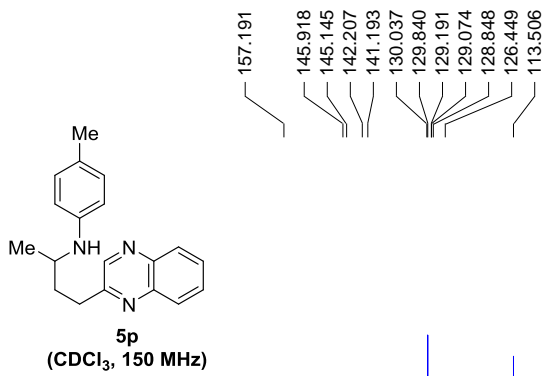

**5p**  
(CDCl<sub>3</sub>, 150 MHz)

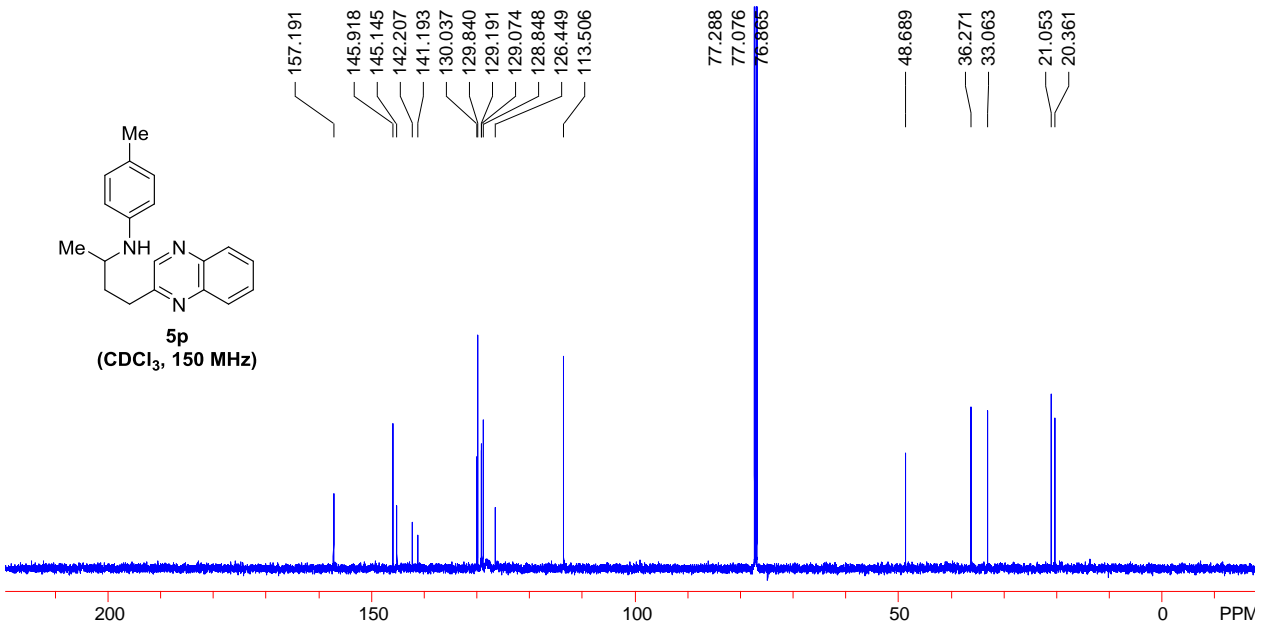

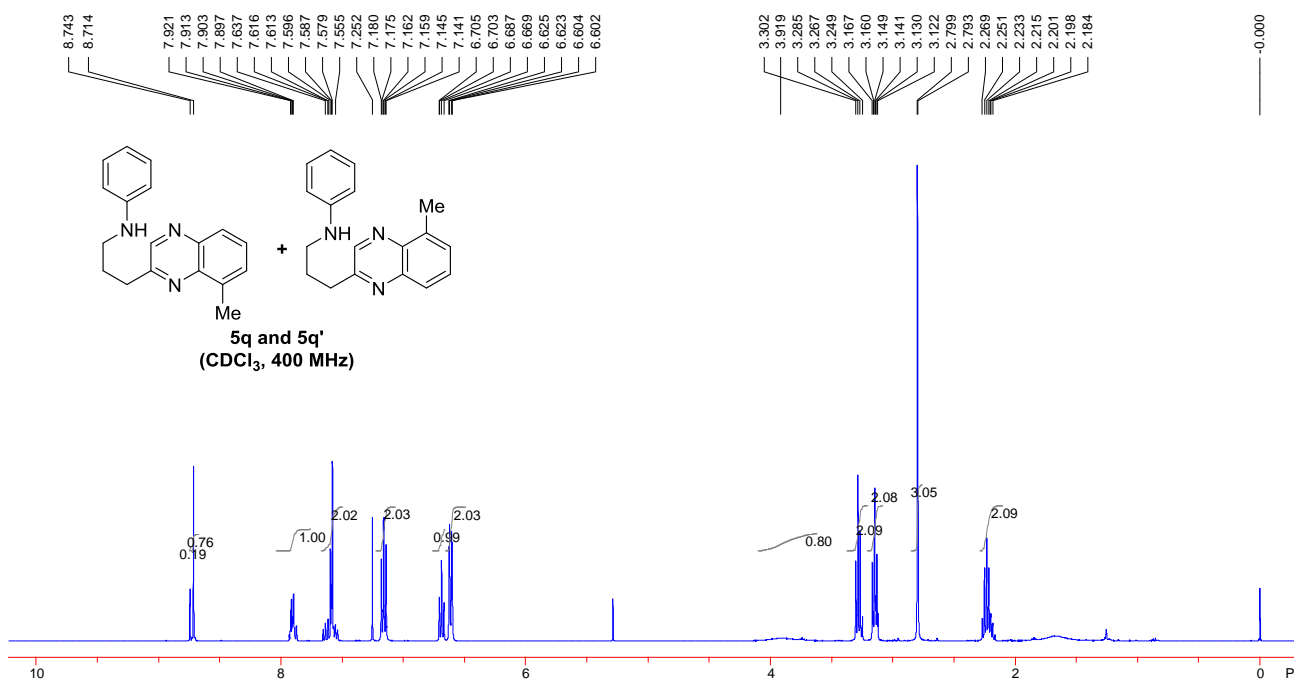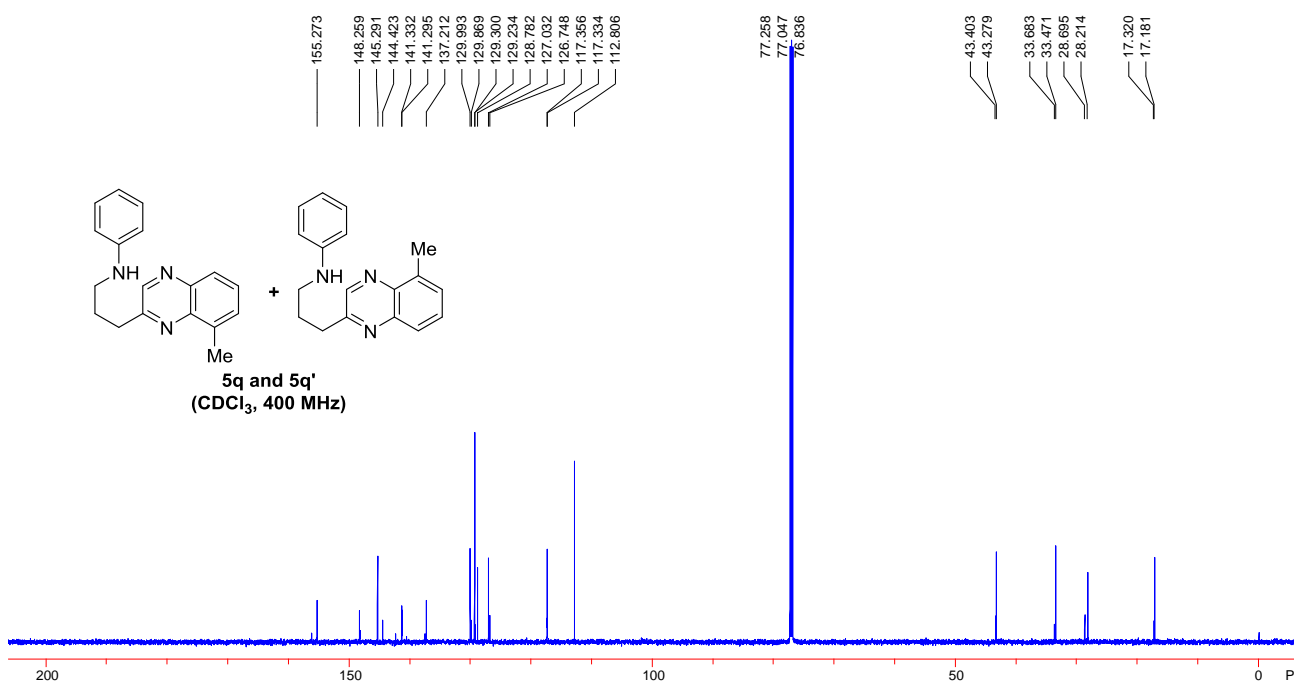

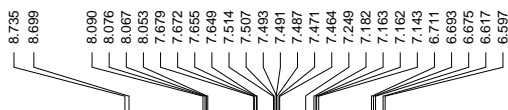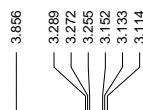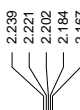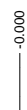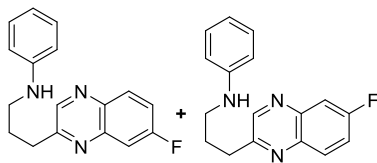

5r and 5r'  
(CDCl<sub>3</sub>, 400 MHz)

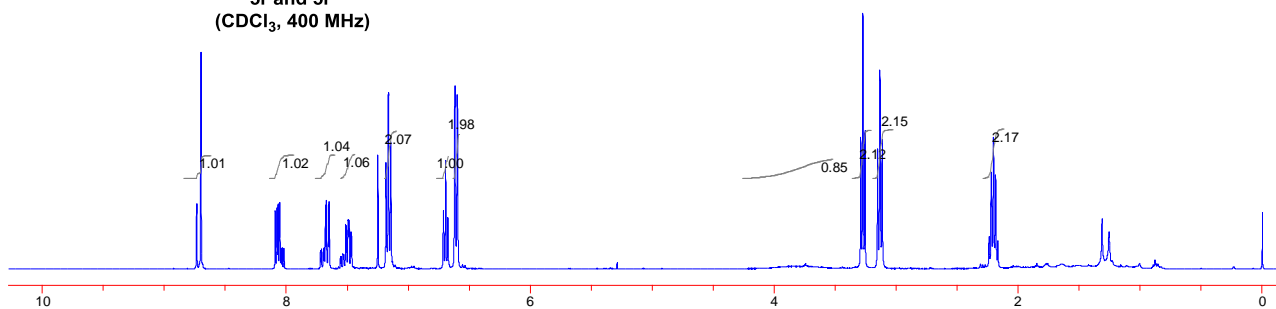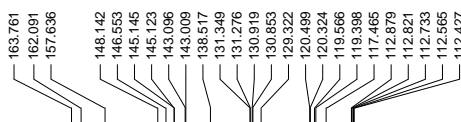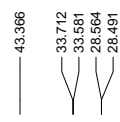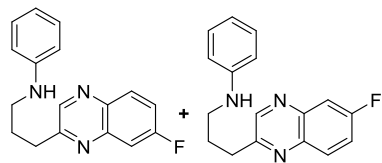

5r and 5r'  
(CDCl<sub>3</sub>, 150 MHz)

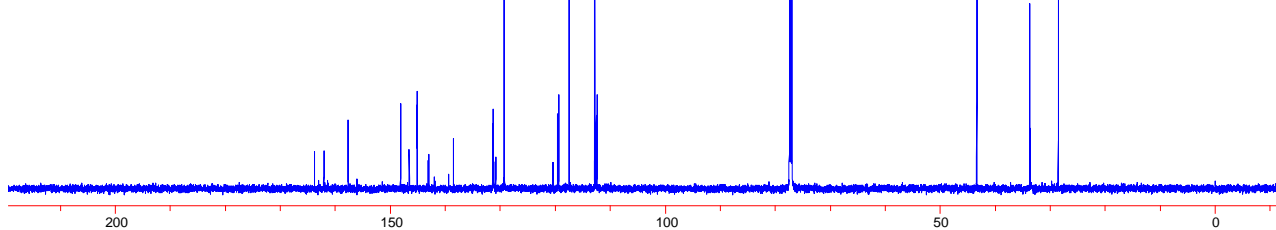



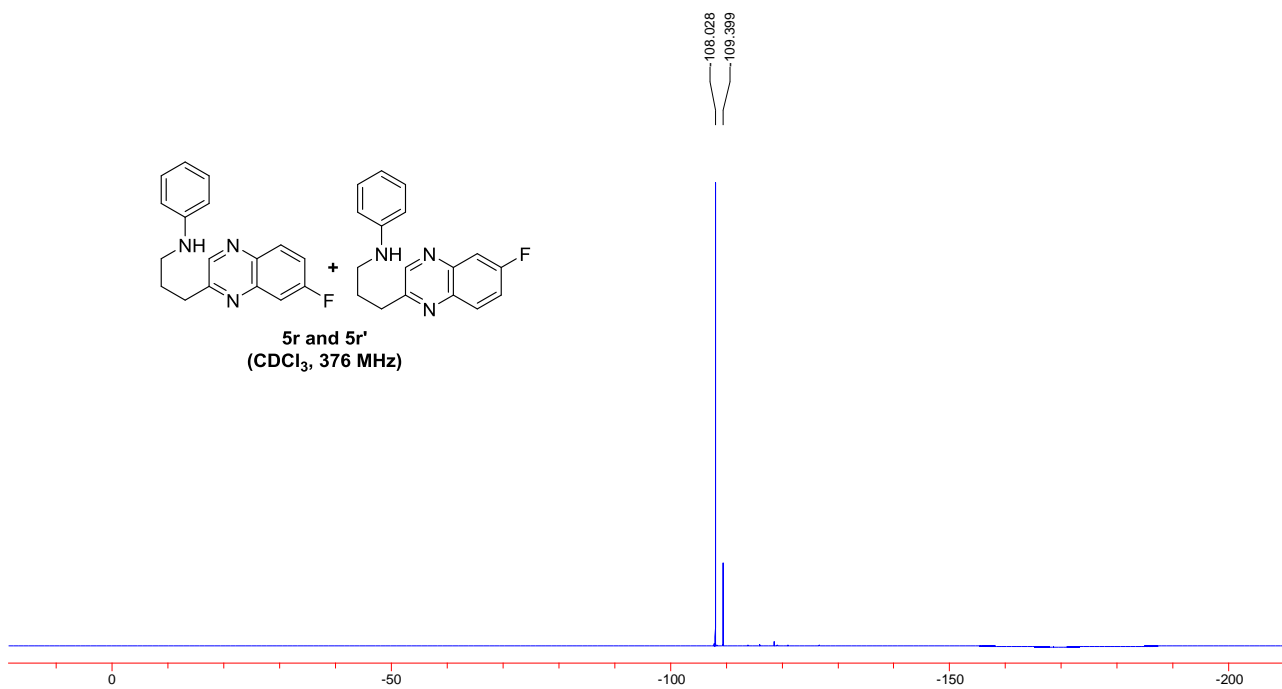

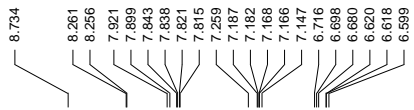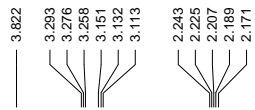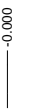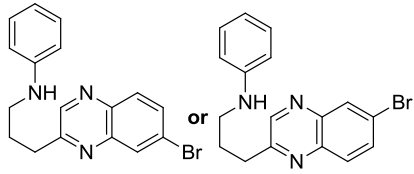

5s or 5s'  
(CDCl<sub>3</sub>, 400 MHz)

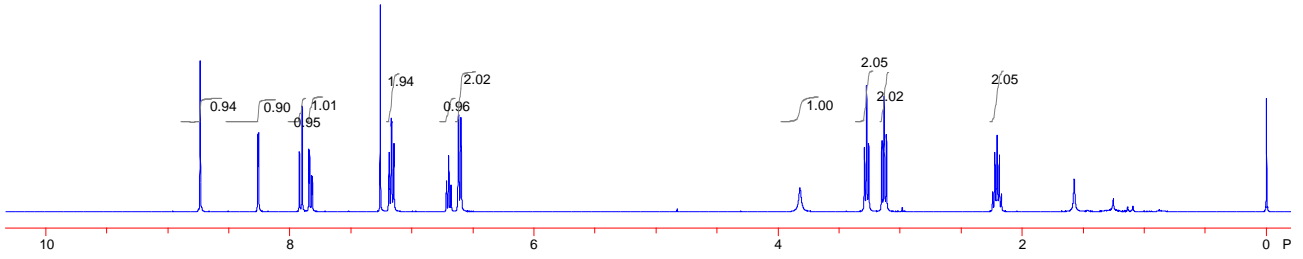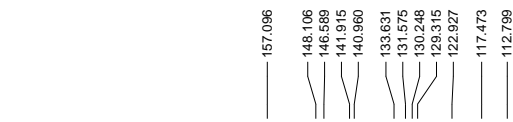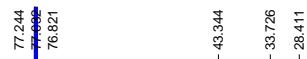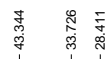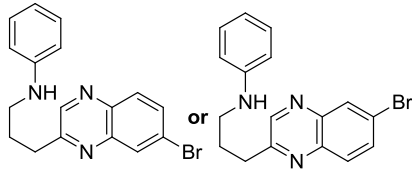

5s or 5s'  
(CDCl<sub>3</sub>, 150 MHz)

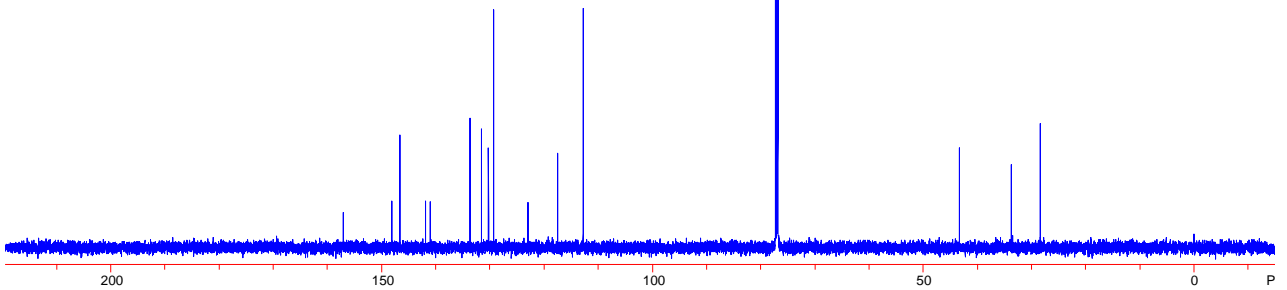

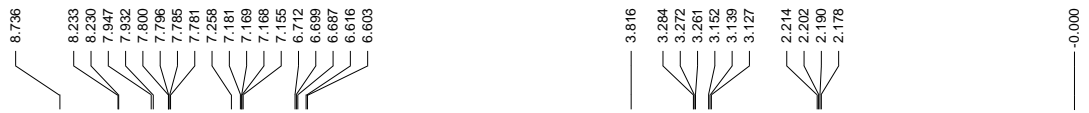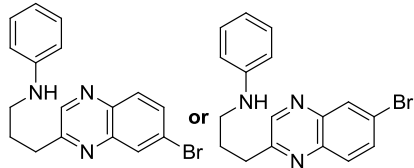

**5s or 5s'**  
(CDCl<sub>3</sub>, 600 MHz)

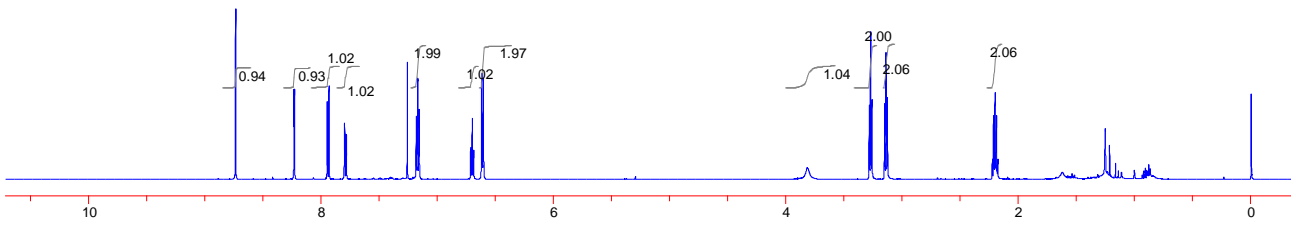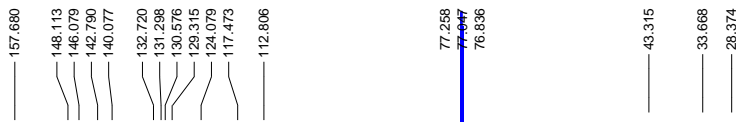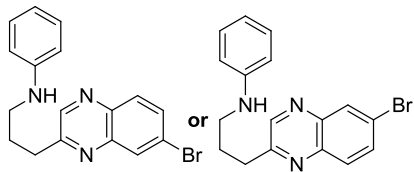

**5s or 5s'**  
(CDCl<sub>3</sub>, 150 MHz)

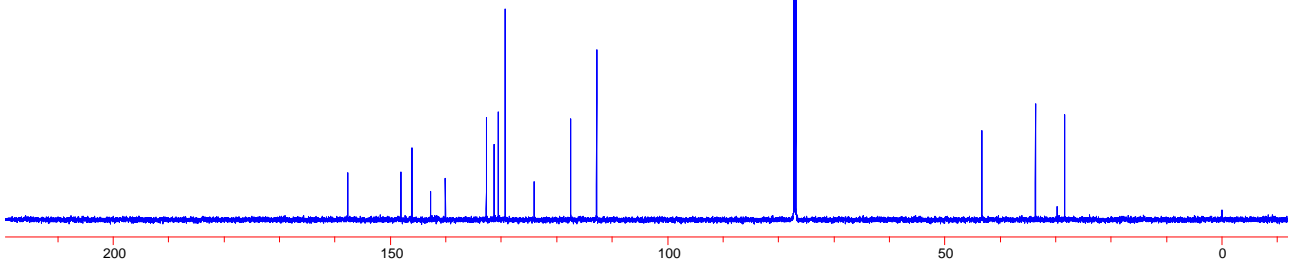

## V. Copies of the NMR spectra of 6a-6f

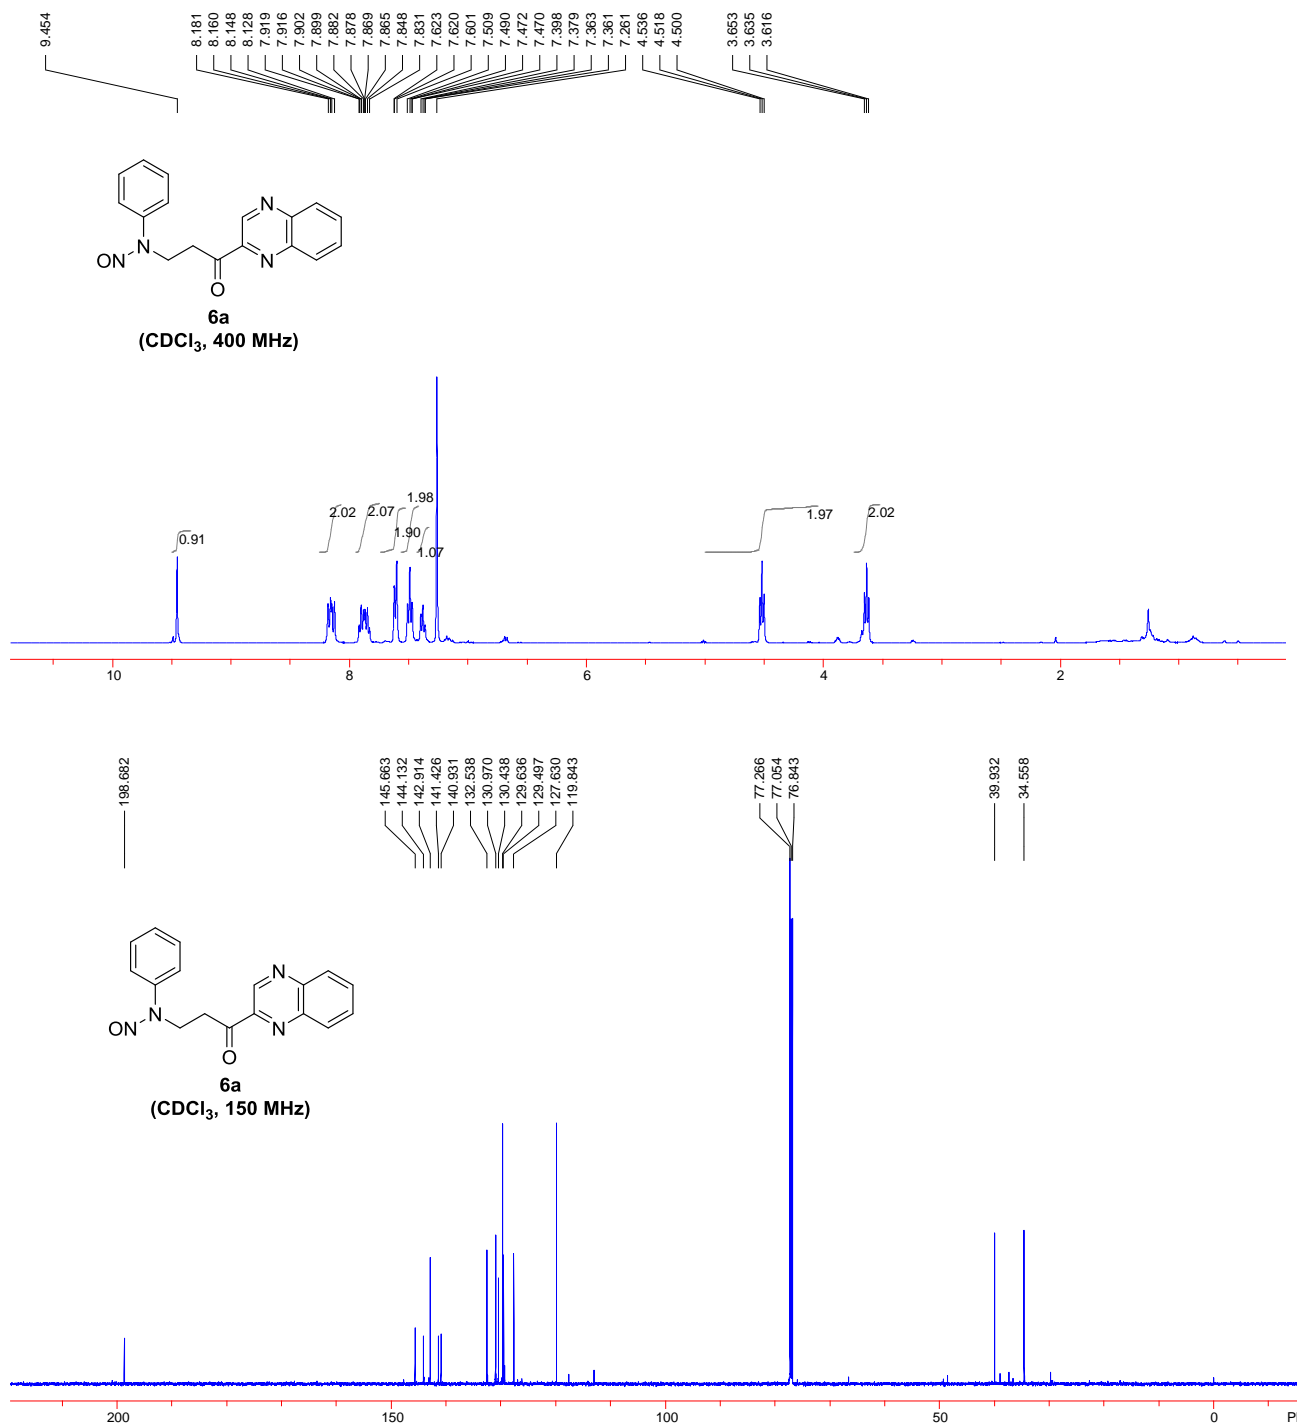

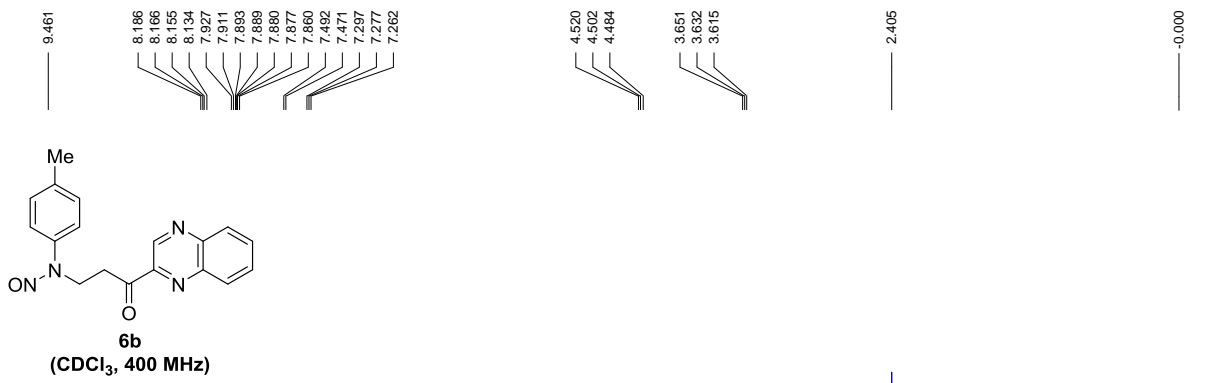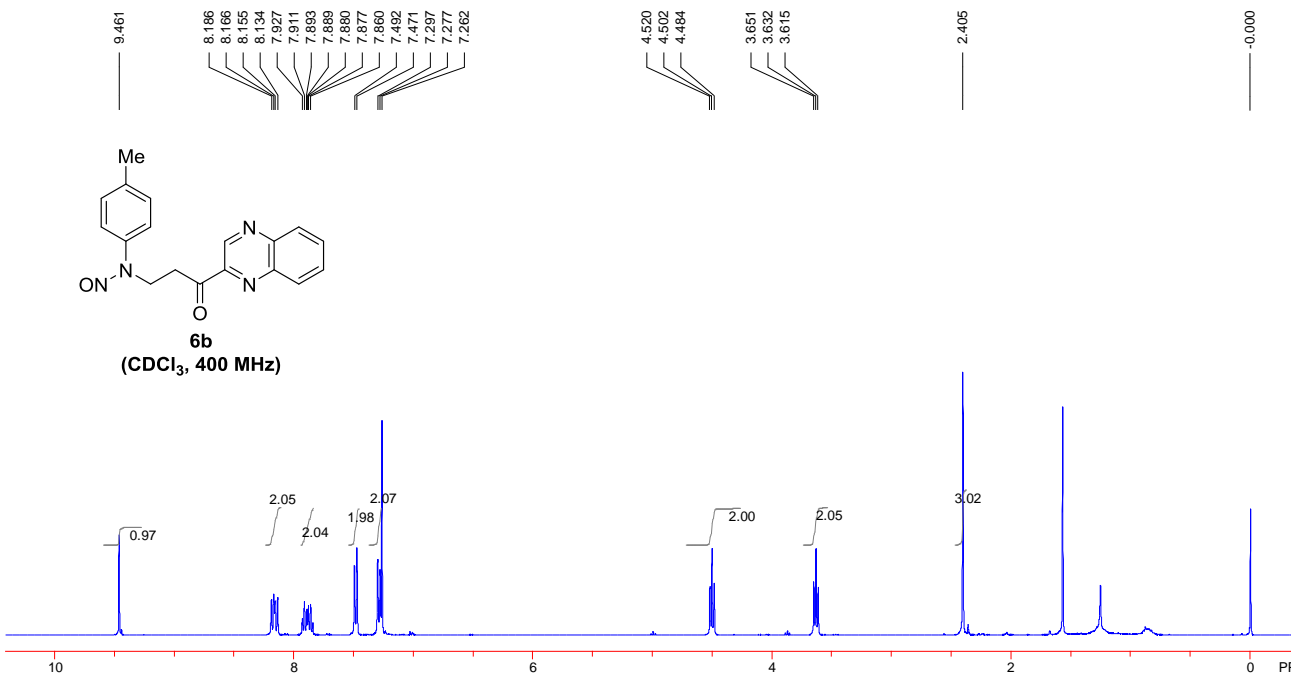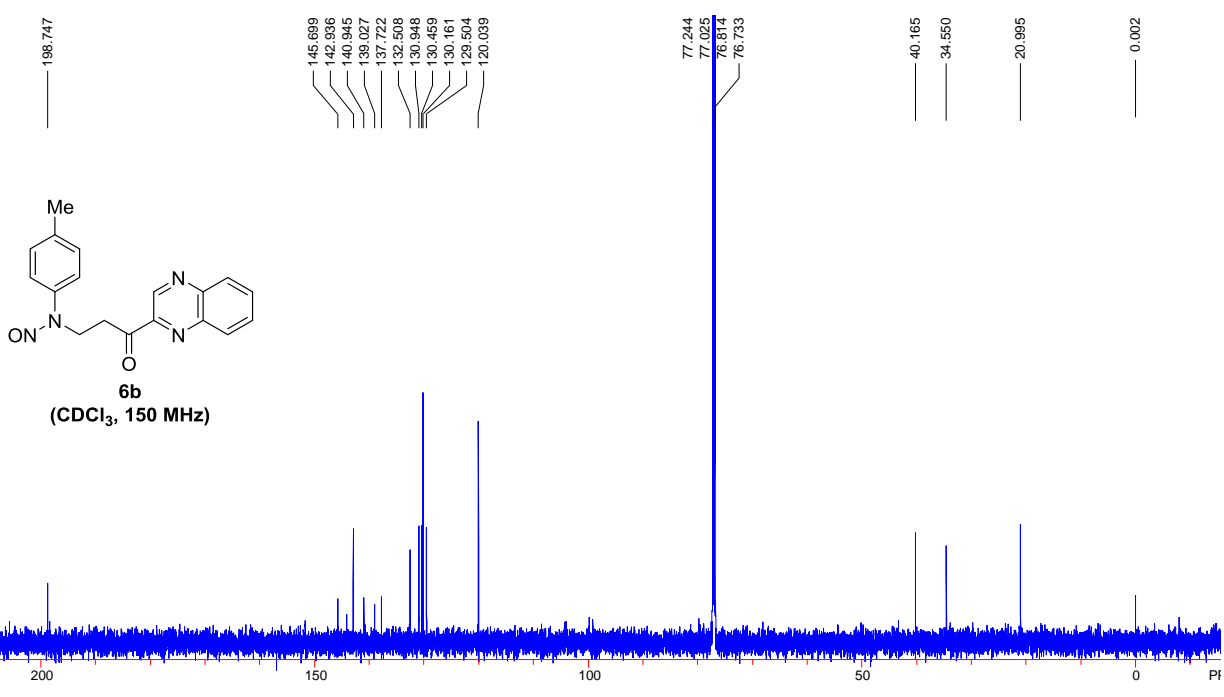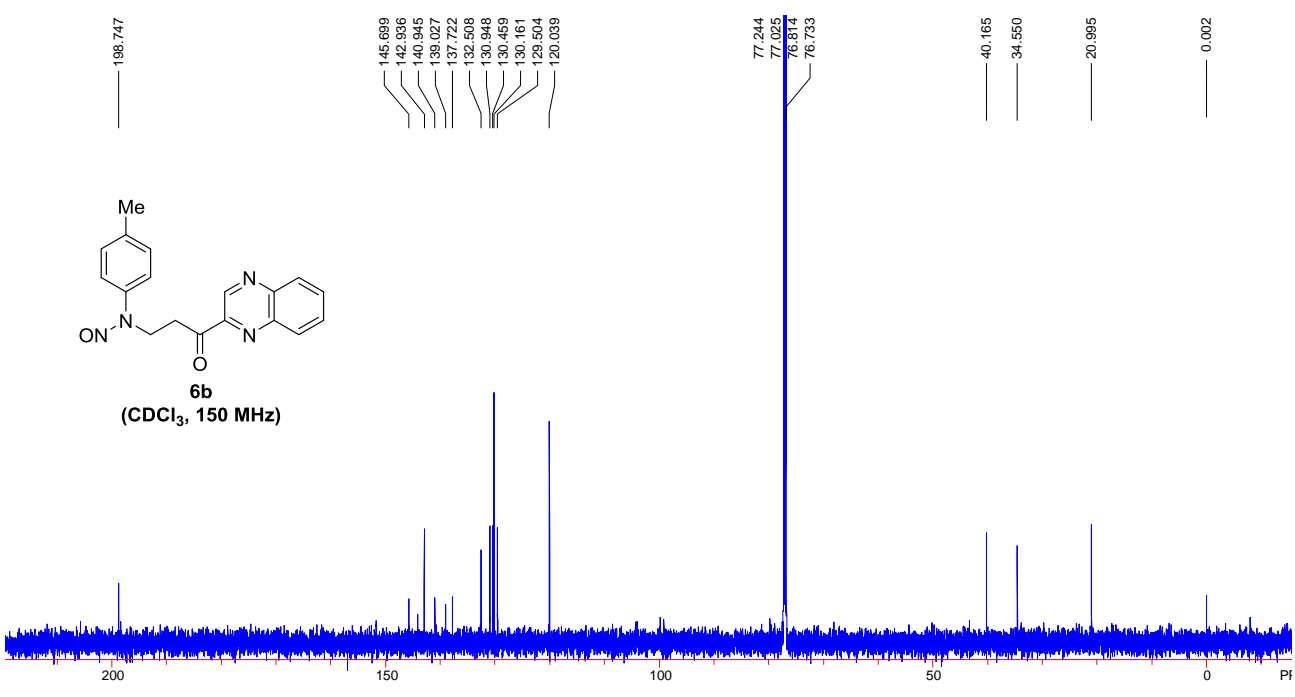

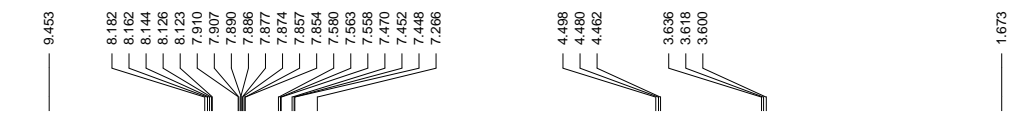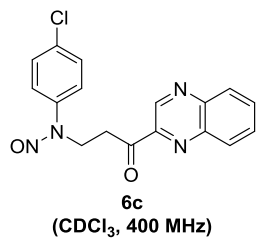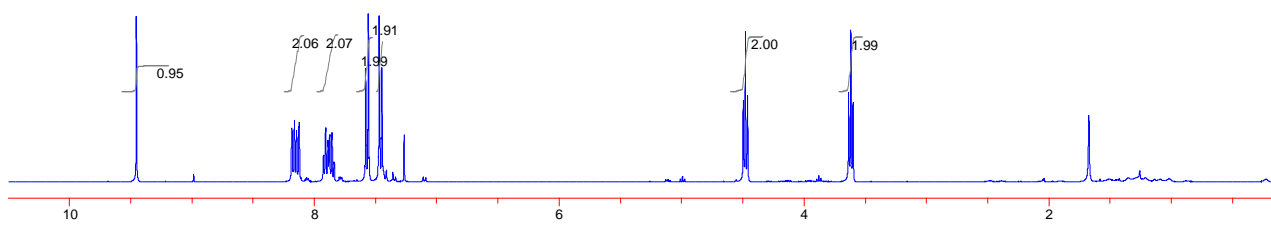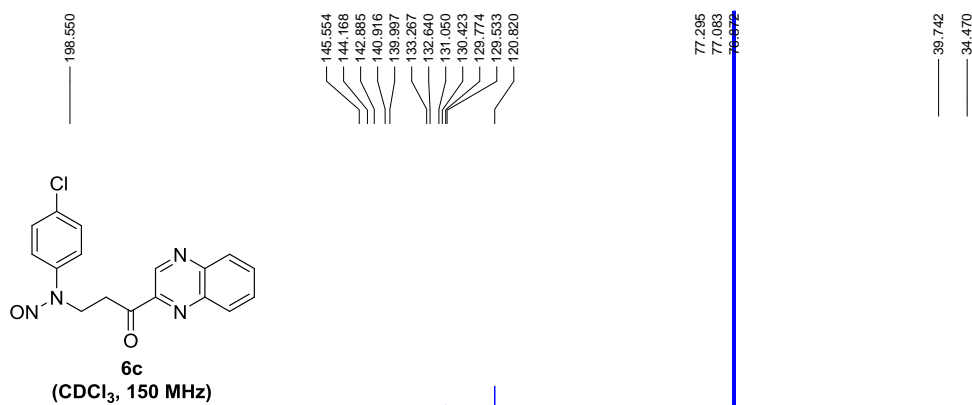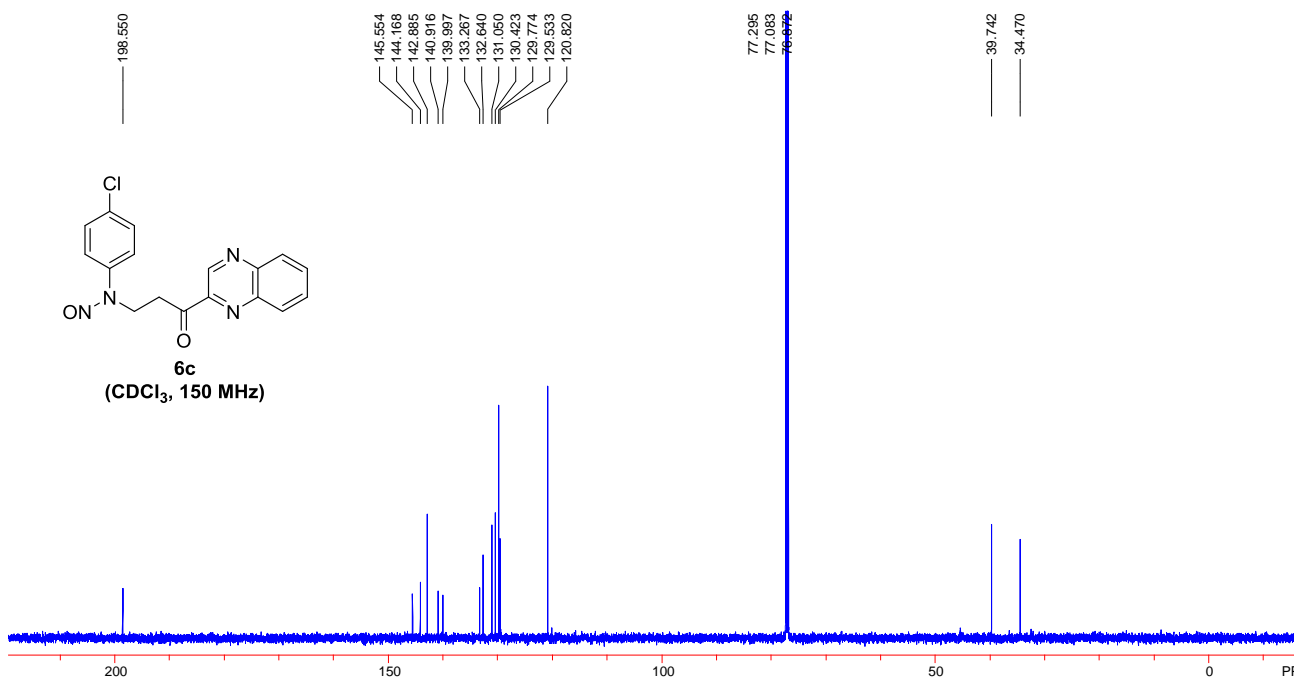

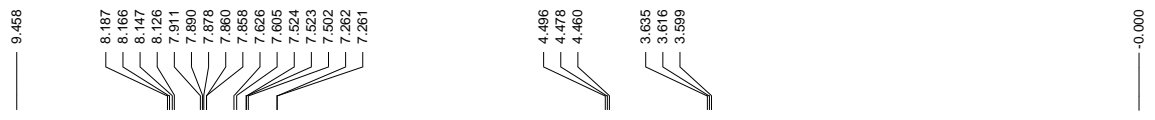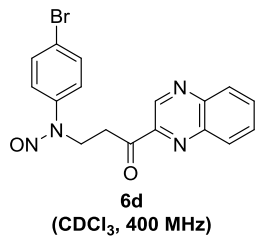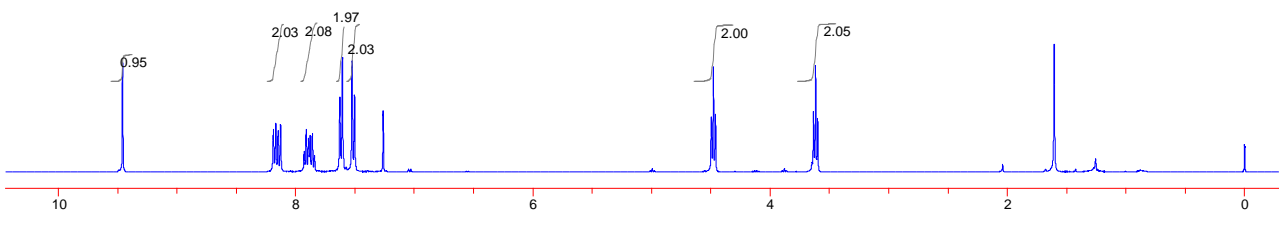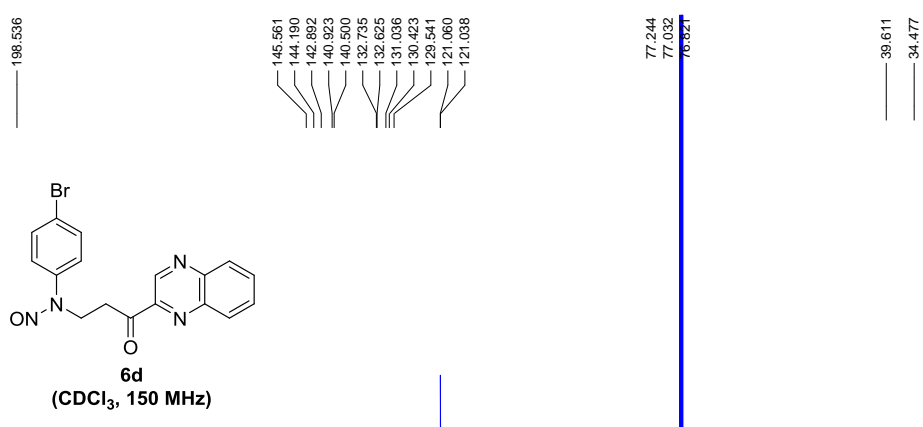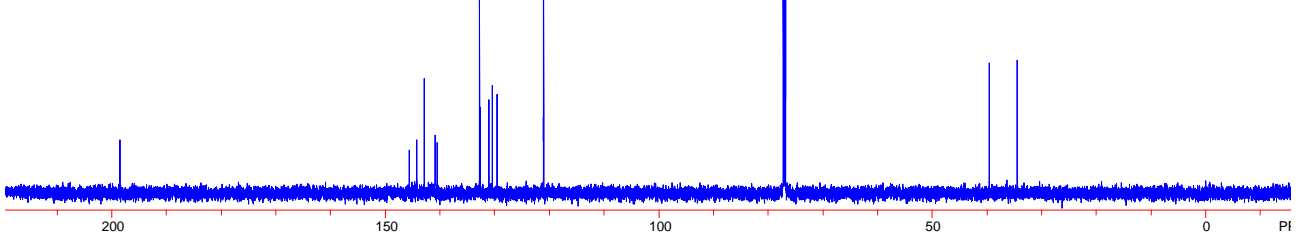

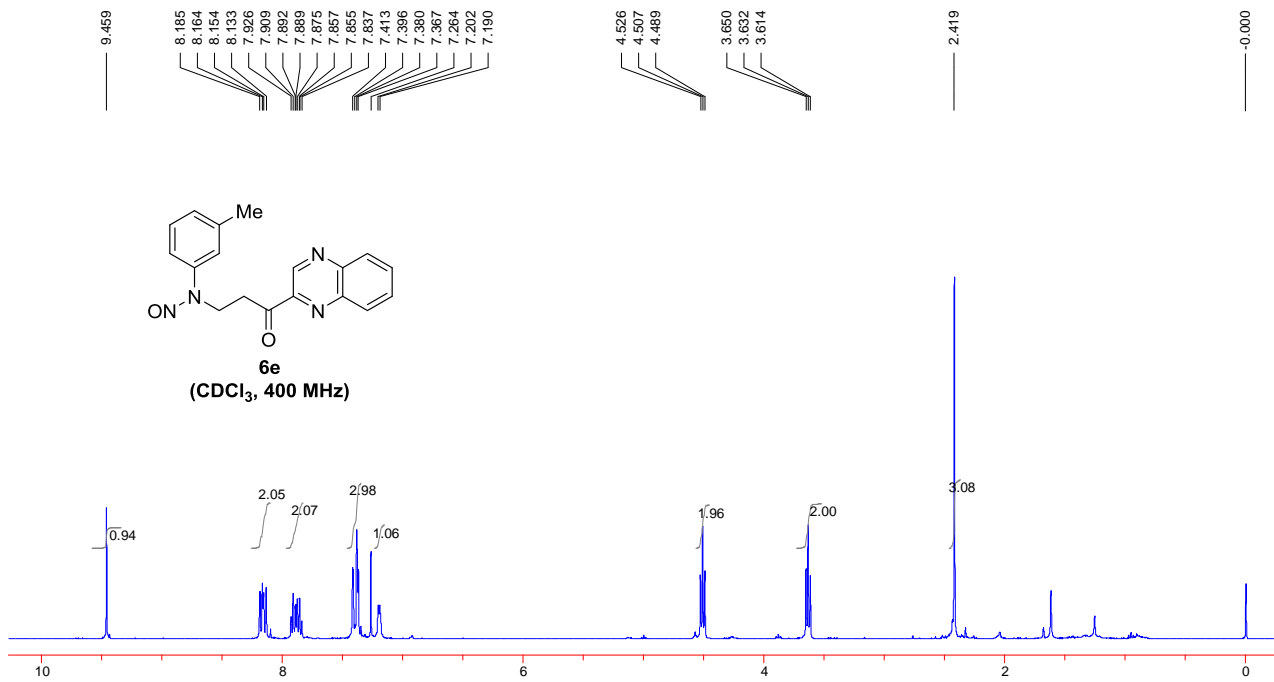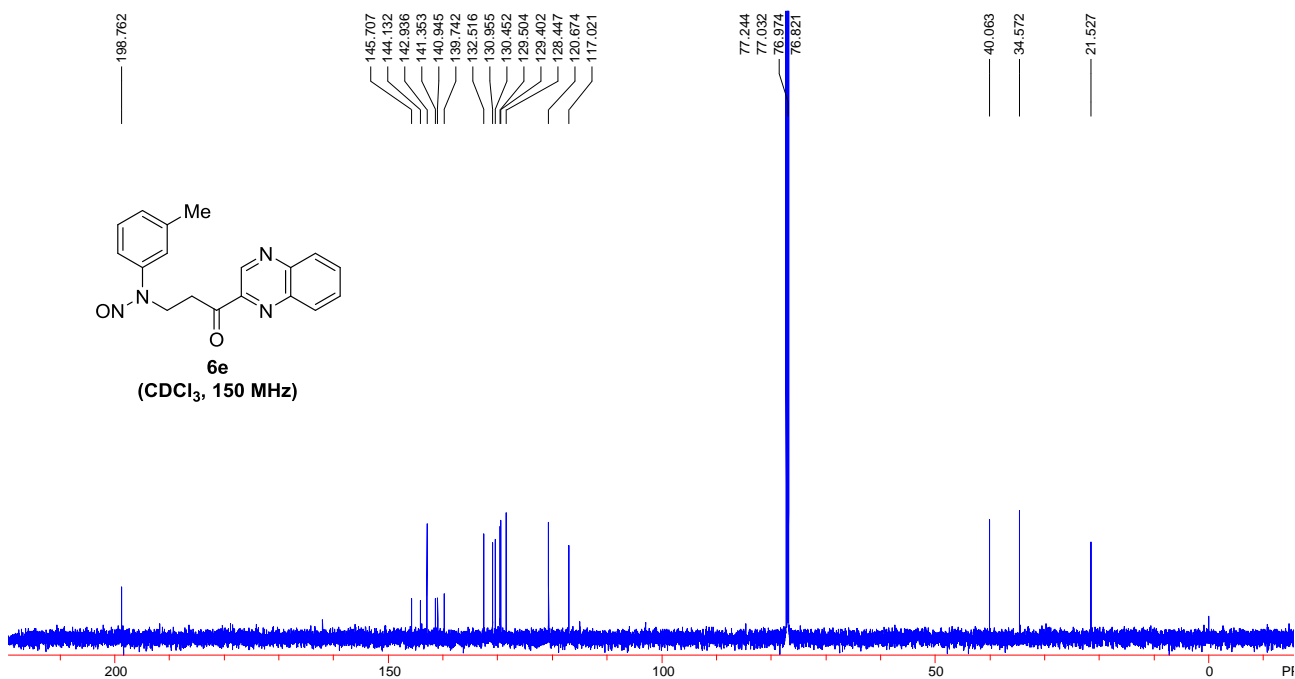



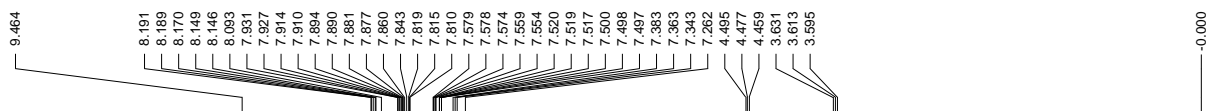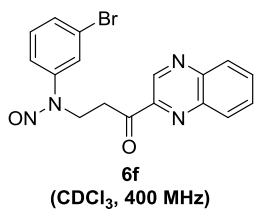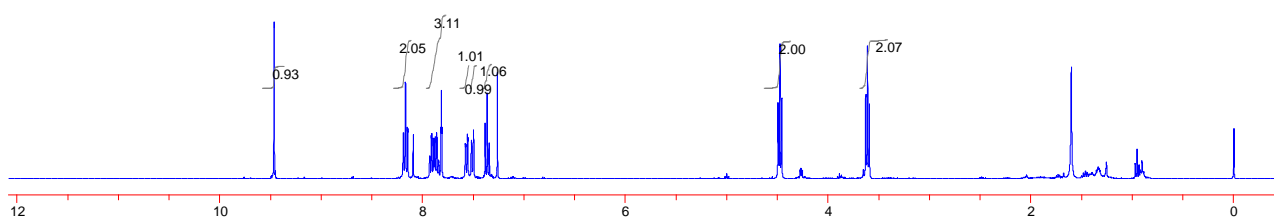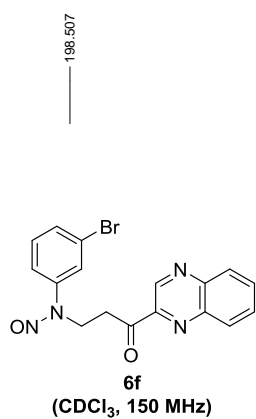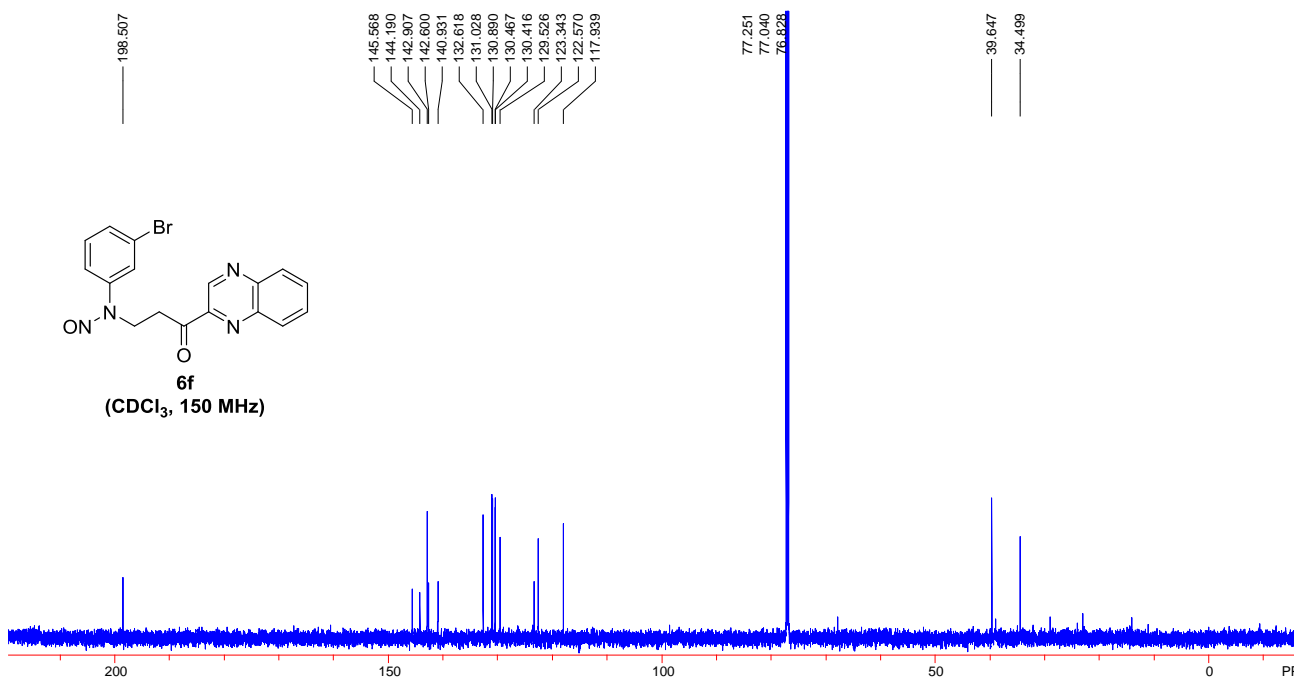

## VI. X-ray Crystal Structures and Data of 3a

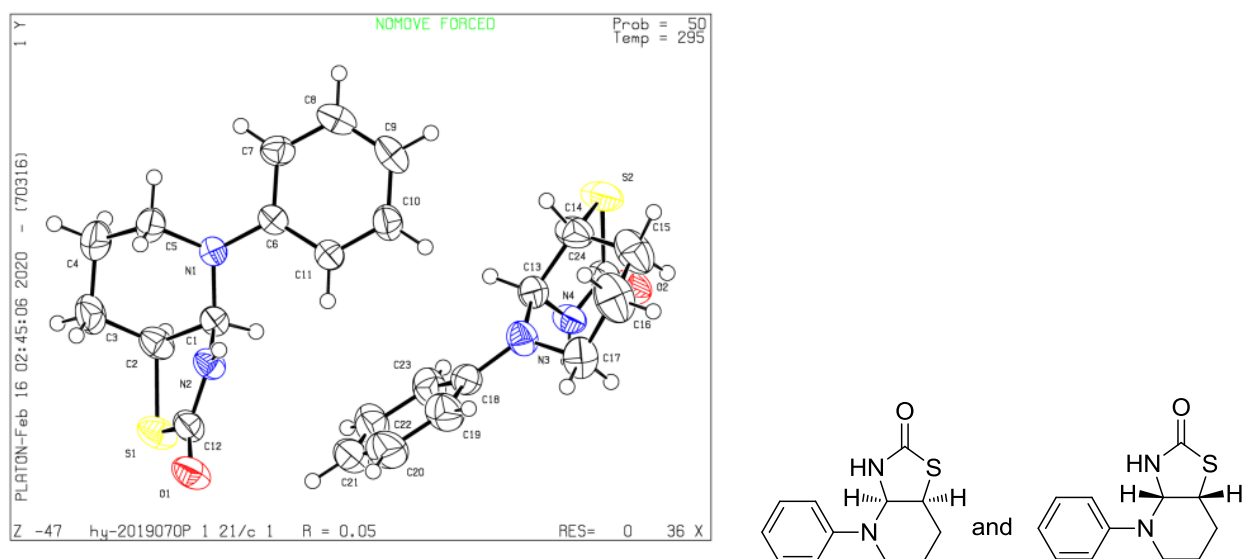

**Fig. S6** X-ray structure of **3a** with 50% ellipsoid probability

**X-ray structure determination.** Single crystals suitable for X-ray diffraction was obtained by slow evaporation of the solvent from a CH<sub>3</sub>CN solution of **3a**. Crystal data collection and refinement parameters of **3a** are summarized in Table S1. Intensity data were collected at 298 K on a SuperNova Dualdiffractometer using mirror-monochromated Mo K $\alpha$  radiation,  $\lambda = 0.71073$  Å. The data were corrected for decay, Lorentz, and polarization effects as well as absorption and beam corrections based on the multi-scan technique. The structure was solved by a combination of direct methods in SHELXTL and the difference Fourier technique, and refined by full-matrix least-squares procedures. Nonhydrogen atoms were refined with anisotropic displacement parameters. The H-atoms were either located or calculated and subsequently treated with a riding model.

**Table S1** Crystallographic data and structure refinement results of **3a**

|                   |                                                   |
|-------------------|---------------------------------------------------|
| Empirical formula | C <sub>12</sub> H <sub>14</sub> N <sub>2</sub> OS |
| Formula weight    | 234.08                                            |
| Temp, K           | 295.25(16)                                        |
| Crystal system    | monoclinic                                        |
| Space group       | P2 <sub>1</sub> /c                                |
| <i>a</i> , Å      | 10.7386(4)                                        |
| <i>b</i> , Å      | 13.7675(5)                                        |
| <i>c</i> , Å      | 15.6087(5)                                        |

|                                        |                |
|----------------------------------------|----------------|
| $\alpha$ (°)                           | 90             |
| $\beta$ (°)                            | 90.917(3)      |
| $\gamma$ (°)                           | 90             |
| Volume, Å <sup>3</sup>                 | 2307.35(14)    |
| Z                                      | 4              |
| $d_{\text{calc}}$ , g cm <sup>-3</sup> | 1.349          |
| $\lambda$ , Å                          | 0.71073        |
| $\mu$ , mm <sup>-1</sup>               | 0.260          |
| No. of data collected                  | 18532          |
| No. of unique data                     | 5454/0/289     |
| $R_{\text{int}}$ , $R_{\text{sigma}}$  | 0.0307, 0.0344 |
| Goodness-of-fit on $F^2$               | 1.039          |
| $R_1$ , $wR_2$ ( $I > 2\sigma(I)$ )    | 0.0473, 0.1072 |
| $R_1$ , $wR_2$ (all data)              | 0.0730, 0.1199 |

## VII. Copies of $^1\text{H}$ - $^1\text{H}$ NOESY spectra of **3m** and **3n**

According to the cross-peaks of **3m**-Me-H1 to **3m**-H2 and **3m**-H2 to **3m**-H3 appeared on the  $^1\text{H}$ - $^1\text{H}$  NOESY spectrum of **3m**, we could deduce that **3m**-Me, **3m**-H2 and **3m**-H3 were located at the same side.

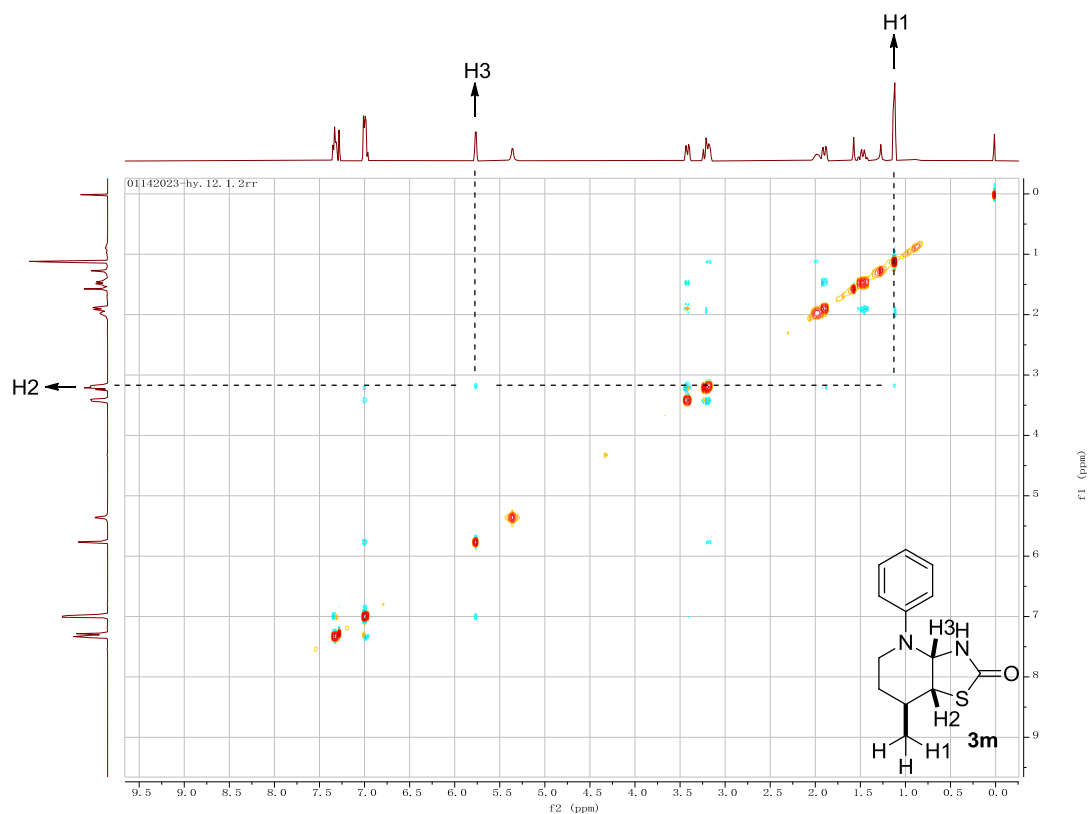

According to the cross-peaks of **3n**-Me-H1 to **3n**-H2 and **3n**-H2 to **3n**-H3 appeared on the  $^1\text{H}$ - $^1\text{H}$  NOESY spectrum of **3n**, we could deduce that **3n**-Me, **3n**-H2 and **3n**-H3 were located at the same side.

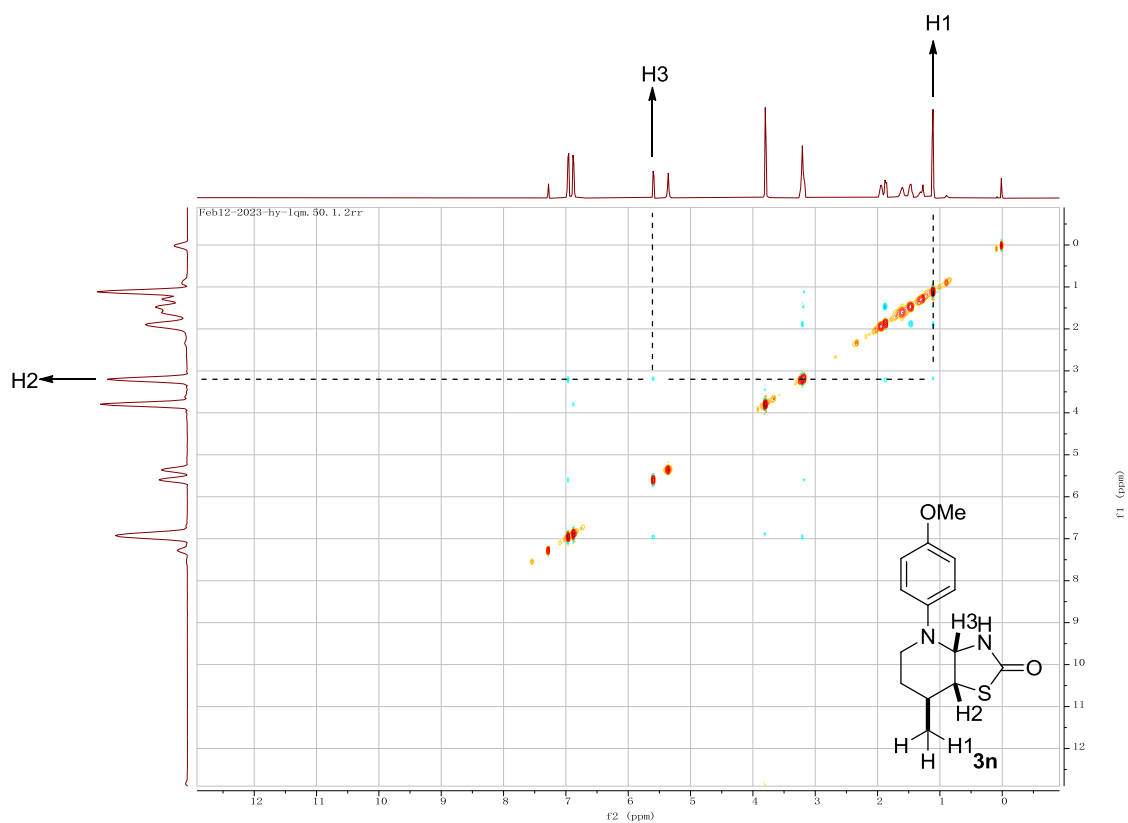

## VIII. Details of DFT Calculations

All calculations have been performed using the DFT method implemented in the commercial Gaussian 16<sup>3</sup> program package. Molecular geometries of the model complexes were optimized applying the M062X(D3)<sup>4,5</sup> functional with the 6-31G(d)<sup>6</sup> basis set with the SMD<sup>7</sup> continuum solvation model in DMF. As soon as the convergences of optimizations were obtained, the frequency calculations at the same level have been performed to identify all the stationary points as minima. All transition states were further confirmed by vibrational analysis and characterized by the only one imaginary frequency. Furthermore intrinsic reaction coordinate (IRC)<sup>8</sup> calculations were performed to confirm that the optimized transition states correctly connect the relevant reactants and products. Additionally, the single-point energies for all stationary points have also been calculated at the M062x(D3)/6-311+G(d,p) level in tetrahydrofuran solvent to provide more accurate energy information. All energies discussed in the following parts are Gibbs free energies calculated at 298.15 K unless otherwise stated. All of the optimized geometries mentioned were built by Gaussview 6.0.<sup>9</sup>

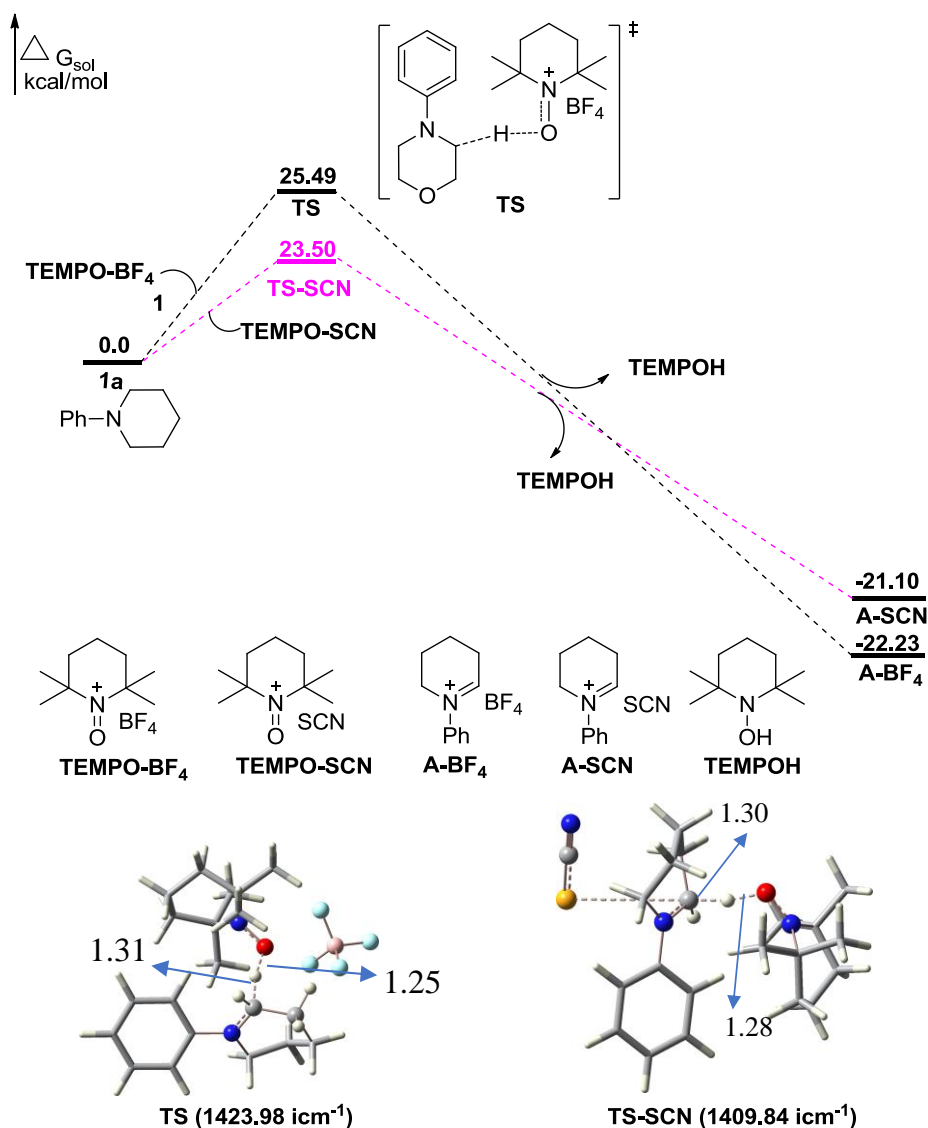

**Fig. S7** Computational investigation on the rate determining step for the formation of **5a**

Considering that KSCN as additive can improve the yield of the reaction for the formation of **5a**, calculations of the rate determining step (hydride abstraction from  $\alpha$ -carbon of piperidine **1a** by TEMPO<sup>+</sup> acts as the initial step for the formation of iminium intermediate **A-BF<sub>4</sub>**) with a SCN ion was conducted (Fig. S7). It requires a free energy barrier of 23.50 kcal/mol (**TS-SCN**), which is lower than that with a BF<sub>4</sub><sup>-</sup> (25.49 kcal/mol, **TS**). This result shows that SCN ion is favorable for rate determining step to further improve the formation of product **5a**.

## Coordinates of Stationary Points

Cartesian coordinates (in Å),  $E_{\text{sol}}$  (in kcal/mol), Gibbs free energies ( $G_{\text{sol}}$ , in kcal/mol) and the number of imaginary vibrational frequencies ( $N_{\text{imag}}$ ) for the stationary points computed at the M062x(D3)/6-311+G(d,p) level in tetrahydrofuran solvent.

**Table S2**

|                            | $G_{\text{sol}}$ | Thermal<br>correction to<br>Gibbs Free<br>Energy (TCG) | $E_{\text{sol}}$ | $\Delta G_{\text{sol}}=E_{\text{sol}}+\text{TCG}$ | $N_{\text{imag}}$ |
|----------------------------|------------------|--------------------------------------------------------|------------------|---------------------------------------------------|-------------------|
| <b>1a</b>                  | -482.532186      | 0.205377                                               | -482.8663901     | -482.6610131                                      | 0                 |
| <b>TEMPOBF<sub>4</sub></b> | -907.560626      | 0.239119                                               | -908.0964087     | -907.8572897                                      | 0                 |
| <b>TS</b>                  | -1390.055065     | 0.463005                                               | -1390.940679     | -1390.477674                                      | -1423.98          |
| <b>A-BF<sub>4</sub></b>    | -906.26548       | 0.201725                                               | -906.75148       | -906.549755                                       | 0                 |
| <b>TEMPOH</b>              | -483.857679      | 0.241618                                               | -484.2455952     | -484.0039772                                      | 0                 |
| <b>TEMPOSCN</b>            | -974.216089      | 0.232562                                               | -974.6467954     | -974.4142334                                      | 0                 |
| <b>TS-SCN</b>              | -1456.710647     | 0.455251                                               | -1457.49304      | -1457.037789                                      | -1409.84          |
| <b>A-SCN</b>               | -972.917917      | 0.198948                                               | -973.3038418     | -973.1048938                                      | 0                 |

### 1a

Standard orientation:

| Center<br>Number | Atomic<br>Number | Atomic<br>Type | Coordinates (Angstroms) |           |           |
|------------------|------------------|----------------|-------------------------|-----------|-----------|
|                  |                  |                | X                       | Y         | Z         |
| 1                | 6                | 0              | -2.627068               | -1.034849 | 0.728272  |
| 2                | 6                | 0              | -1.290588               | -1.248985 | 0.021580  |
| 3                | 6                | 0              | -1.290582               | 1.248964  | -0.021599 |
| 4                | 6                | 0              | -2.627103               | 1.034865  | -0.728225 |
| 5                | 6                | 0              | -3.499836               | -0.000011 | 0.000022  |
| 6                | 1                | 0              | -0.711261               | -1.997745 | 0.570064  |
| 7                | 1                | 0              | -1.453507               | -1.642836 | -0.994604 |
| 8                | 1                | 0              | -4.152277               | -0.498259 | -0.724600 |



|    |   |   |           |           |           |
|----|---|---|-----------|-----------|-----------|
| 9  | 1 | 0 | -2.413312 | -0.693931 | 1.747918  |
| 10 | 1 | 0 | -1.453432 | 1.642786  | 0.994611  |
| 11 | 1 | 0 | -0.711285 | 1.997742  | -0.570094 |
| 12 | 1 | 0 | -2.413402 | 0.694002  | -1.747900 |
| 13 | 1 | 0 | -3.146437 | 1.994146  | -0.813607 |
| 14 | 1 | 0 | -4.152305 | 0.498210  | 0.724638  |
| 15 | 1 | 0 | -3.146399 | -1.994125 | 0.813738  |
| 16 | 7 | 0 | -0.534599 | -0.000009 | -0.000061 |
| 17 | 6 | 0 | 0.841660  | -0.000007 | -0.000036 |
| 18 | 6 | 0 | 1.575784  | -1.166974 | -0.311524 |
| 19 | 6 | 0 | 1.575756  | 1.166976  | 0.311478  |
| 20 | 6 | 0 | 2.966111  | -1.157784 | -0.304174 |
| 21 | 1 | 0 | 1.055791  | -2.077794 | -0.587120 |
| 22 | 6 | 0 | 2.966080  | 1.157801  | 0.304206  |
| 23 | 1 | 0 | 1.055728  | 2.077787  | 0.587034  |
| 24 | 6 | 0 | 3.680838  | 0.000010  | 0.000037  |
| 25 | 1 | 0 | 3.495996  | -2.073318 | -0.554153 |
| 26 | 1 | 0 | 3.495947  | 2.073338  | 0.554209  |
| 27 | 1 | 0 | 4.766035  | 0.000020  | 0.000070  |

-----

**TEMPOBF<sub>4</sub>**

Standard orientation:

-----

| Center | Atomic | Atomic | Coordinates (Angstroms) |           |           |
|--------|--------|--------|-------------------------|-----------|-----------|
| Number | Number | Type   | X                       | Y         | Z         |
| 1      | 6      | 0      | 2.397426                | 1.062156  | 1.028407  |
| 2      | 6      | 0      | 1.251253                | 1.310309  | 0.034497  |
| 3      | 6      | 0      | 1.226574                | -1.342304 | -0.006801 |
| 4      | 6      | 0      | 2.752917                | -1.351203 | 0.301708  |

|    |   |   |           |           |           |
|----|---|---|-----------|-----------|-----------|
| 5  | 6 | 0 | 3.386066  | 0.037380  | 0.476936  |
| 6  | 1 | 0 | 3.761511  | 0.391607  | -0.489976 |
| 7  | 1 | 0 | 2.008659  | 0.750321  | 2.000988  |
| 8  | 1 | 0 | 3.260452  | -1.888896 | -0.503313 |
| 9  | 1 | 0 | 2.860915  | -1.941537 | 1.216162  |
| 10 | 1 | 0 | 4.250263  | -0.041608 | 1.140523  |
| 11 | 1 | 0 | 2.888846  | 2.027460  | 1.180408  |
| 12 | 7 | 0 | 0.936947  | -0.009629 | -0.655832 |
| 13 | 6 | 0 | 0.825048  | -2.432030 | -0.983990 |
| 14 | 1 | 0 | -0.252066 | -2.408867 | -1.168078 |
| 15 | 1 | 0 | 1.360814  | -2.342691 | -1.932344 |
| 16 | 1 | 0 | 1.088188  | -3.388797 | -0.525983 |
| 17 | 6 | 0 | 0.390955  | -1.452185 | 1.280896  |
| 18 | 1 | 0 | -0.665658 | -1.273089 | 1.083697  |
| 19 | 1 | 0 | 0.523543  | -2.482015 | 1.624445  |
| 20 | 1 | 0 | 0.738413  | -0.792070 | 2.075334  |
| 21 | 6 | 0 | 1.646811  | 2.299447  | -1.060587 |
| 22 | 1 | 0 | 0.828756  | 2.469633  | -1.762137 |
| 23 | 1 | 0 | 1.880736  | 3.245306  | -0.566655 |
| 24 | 1 | 0 | 2.530607  | 1.963576  | -1.610548 |
| 25 | 6 | 0 | -0.053541 | 1.764609  | 0.704213  |
| 26 | 1 | 0 | 0.177916  | 2.705997  | 1.211661  |
| 27 | 1 | 0 | -0.830915 | 1.940149  | -0.041538 |
| 28 | 1 | 0 | -0.423034 | 1.051314  | 1.441754  |
| 29 | 8 | 0 | 0.476123  | 0.020317  | -1.744613 |
| 30 | 9 | 0 | -3.141172 | 1.369923  | -0.180811 |
| 31 | 9 | 0 | -2.651953 | -0.160034 | 1.452915  |
| 32 | 9 | 0 | -4.038248 | -0.733520 | -0.275725 |
| 33 | 9 | 0 | -1.802062 | -0.424677 | -0.653793 |
| 34 | 5 | 0 | -2.919139 | 0.015355  | 0.087676  |

-----  
**TS**

Standard orientation:

-----

| Center<br>Number | Atomic<br>Number | Atomic<br>Type | Coordinates (Angstroms) |           |           |
|------------------|------------------|----------------|-------------------------|-----------|-----------|
|                  |                  |                | X                       | Y         | Z         |
| 1                | 6                | 0              | 0.294035                | 3.731387  | 0.714658  |
| 2                | 6                | 0              | 0.889327                | 2.398075  | 1.190433  |
| 3                | 6                | 0              | 0.322091                | 1.698119  | -1.285344 |
| 4                | 6                | 0              | -0.830743               | 2.737062  | -1.320464 |
| 5                | 6                | 0              | -1.027615               | 3.520203  | -0.015313 |
| 6                | 1                | 0              | -1.719028               | 2.982320  | 0.644442  |
| 7                | 1                | 0              | 1.005371                | 4.248896  | 0.061154  |
| 8                | 1                | 0              | -1.763745               | 2.225399  | -1.579749 |
| 9                | 1                | 0              | -0.611759               | 3.431110  | -2.139035 |
| 10               | 1                | 0              | -1.496405               | 4.483772  | -0.235249 |
| 11               | 1                | 0              | 0.158962                | 4.363899  | 1.597862  |
| 12               | 7                | 0              | 0.683062                | 1.384127  | 0.123032  |
| 13               | 6                | 0              | -0.094866               | 0.405354  | -1.981903 |
| 14               | 1                | 0              | 0.736446                | -0.300348 | -2.034529 |
| 15               | 1                | 0              | -0.943238               | -0.064515 | -1.473361 |
| 16               | 1                | 0              | -0.412761               | 0.662475  | -2.996867 |
| 17               | 6                | 0              | 1.595784                | 2.233227  | -1.965836 |
| 18               | 1                | 0              | 2.411087                | 1.517378  | -1.830083 |
| 19               | 1                | 0              | 1.396086                | 2.357774  | -3.035160 |
| 20               | 1                | 0              | 1.901864                | 3.202438  | -1.563358 |
| 21               | 6                | 0              | 0.182454                | 1.903755  | 2.458979  |
| 22               | 1                | 0              | 0.588429                | 0.941465  | 2.784471  |
| 23               | 1                | 0              | 0.354676                | 2.632033  | 3.256417  |

|    |   |   |           |           |           |
|----|---|---|-----------|-----------|-----------|
| 24 | 1 | 0 | -0.897761 | 1.801936  | 2.313909  |
| 25 | 6 | 0 | 2.392597  | 2.519468  | 1.459504  |
| 26 | 1 | 0 | 2.550547  | 3.247044  | 2.262273  |
| 27 | 1 | 0 | 2.806209  | 1.554502  | 1.761393  |
| 28 | 1 | 0 | 2.923200  | 2.862453  | 0.566939  |
| 29 | 8 | 0 | 0.969003  | 0.187496  | 0.419191  |
| 30 | 9 | 0 | 2.916080  | -1.825660 | 0.553734  |
| 31 | 9 | 0 | 3.635668  | 0.211013  | -0.230325 |
| 32 | 9 | 0 | 4.777905  | -1.697229 | -0.764051 |
| 33 | 9 | 0 | 2.719203  | -1.314207 | -1.675494 |
| 34 | 5 | 0 | 3.508652  | -1.153937 | -0.523912 |
| 35 | 6 | 0 | 0.190219  | -2.321775 | 1.981730  |
| 36 | 6 | 0 | -0.813255 | -1.352998 | 1.373043  |
| 37 | 6 | 0 | -1.285261 | -2.878800 | -0.509643 |
| 38 | 6 | 0 | 0.192676  | -3.201699 | -0.360957 |
| 39 | 1 | 0 | -1.290579 | -0.686426 | 2.095415  |
| 40 | 1 | 0 | -0.003823 | -0.483113 | 0.829969  |
| 41 | 1 | 0 | -0.211067 | -2.631264 | 2.953648  |
| 42 | 1 | 0 | -1.884420 | -3.769119 | -0.281029 |
| 43 | 1 | 0 | -1.530012 | -2.558423 | -1.527524 |
| 44 | 1 | 0 | 0.810173  | -2.353285 | -0.679234 |
| 45 | 1 | 0 | 0.421370  | -4.048116 | -1.015479 |
| 46 | 1 | 0 | 1.110025  | -1.762505 | 2.177759  |
| 47 | 7 | 0 | -1.678188 | -1.791410 | 0.405585  |
| 48 | 6 | 0 | -2.861936 | -1.076346 | 0.117579  |
| 49 | 6 | 0 | -2.945911 | 0.299593  | 0.368256  |
| 50 | 6 | 0 | -3.955748 | -1.740733 | -0.450382 |
| 51 | 6 | 0 | -4.118354 | 0.991019  | 0.087046  |
| 52 | 1 | 0 | -2.078523 | 0.838195  | 0.740532  |
| 53 | 6 | 0 | -5.122087 | -1.036376 | -0.733169 |

|    |   |   |           |           |           |
|----|---|---|-----------|-----------|-----------|
| 54 | 1 | 0 | -3.904420 | -2.805430 | -0.651521 |
| 55 | 6 | 0 | -5.214319 | 0.327456  | -0.462740 |
| 56 | 1 | 0 | -4.162501 | 2.059359  | 0.279321  |
| 57 | 1 | 0 | -5.966507 | -1.564306 | -1.165519 |
| 58 | 1 | 0 | -6.125838 | 0.870637  | -0.690303 |
| 59 | 6 | 0 | 0.488497  | -3.536705 | 1.095512  |
| 60 | 1 | 0 | -0.138410 | -4.383579 | 1.397940  |
| 61 | 1 | 0 | 1.531728  | -3.832927 | 1.219557  |

-----

### A-BF<sub>4</sub>

Standard orientation:

-----

| Center<br>Number | Atomic<br>Number | Atomic<br>Type | Coordinates (Angstroms) |          |           |
|------------------|------------------|----------------|-------------------------|----------|-----------|
|                  |                  |                | X                       | Y        | Z         |
| 1                | 6                | 0              | -1.334671               | 2.046614 | -0.553745 |
| 2                | 6                | 0              | -0.361012               | 0.939240 | -0.694182 |
| 3                | 6                | 0              | 0.846218                | 2.016310 | 1.042074  |
| 4                | 6                | 0              | 0.686633                | 3.355856 | 0.328106  |
| 5                | 6                | 0              | -0.634720               | 3.421804 | -0.462972 |
| 6                | 1                | 0              | -0.482088               | 0.136982 | -1.416327 |
| 7                | 1                | 0              | -0.442220               | 3.784252 | -1.475001 |
| 8                | 1                | 0              | -1.874289               | 1.841822 | 0.381138  |
| 9                | 1                | 0              | 0.070064                | 1.866357 | 1.800468  |
| 10               | 1                | 0              | 1.821505                | 1.907891 | 1.512159  |
| 11               | 1                | 0              | 1.540560                | 3.482164 | -0.343908 |
| 12               | 1                | 0              | 0.739633                | 4.147100 | 1.079453  |
| 13               | 1                | 0              | -1.333507               | 4.118603 | 0.004376  |
| 14               | 1                | 0              | -2.060501               | 2.001552 | -1.364114 |
| 15               | 7                | 0              | 0.686191                | 0.922166 | 0.057258  |

|    |   |   |           |           |           |
|----|---|---|-----------|-----------|-----------|
| 16 | 6 | 0 | 1.652980  | -0.144775 | 0.000945  |
| 17 | 6 | 0 | 3.007611  | 0.176343  | -0.056238 |
| 18 | 6 | 0 | 1.208207  | -1.463272 | -0.000116 |
| 19 | 6 | 0 | 3.936892  | -0.855904 | -0.128944 |
| 20 | 1 | 0 | 3.328712  | 1.213702  | -0.064279 |
| 21 | 6 | 0 | 2.153219  | -2.484182 | -0.076283 |
| 22 | 1 | 0 | 0.147565  | -1.682805 | 0.071569  |
| 23 | 6 | 0 | 3.511957  | -2.184499 | -0.139357 |
| 24 | 1 | 0 | 4.994581  | -0.619344 | -0.182828 |
| 25 | 1 | 0 | 1.820729  | -3.517254 | -0.074954 |
| 26 | 1 | 0 | 4.242130  | -2.985795 | -0.193991 |
| 27 | 9 | 0 | -1.731111 | -0.565047 | 0.996330  |
| 28 | 9 | 0 | -2.857181 | -0.414654 | -0.986367 |
| 29 | 9 | 0 | -3.760691 | -1.597366 | 0.757422  |
| 30 | 9 | 0 | -1.923618 | -2.404159 | -0.346724 |
| 31 | 5 | 0 | -2.580540 | -1.252110 | 0.104753  |

-----

## TEMPOH

Standard orientation:

-----

| Center | Atomic | Atomic | Coordinates (Angstroms) |           |           |
|--------|--------|--------|-------------------------|-----------|-----------|
| Number | Number | Type   | X                       | Y         | Z         |
| 1      | 6      | 0      | -1.111062               | 1.407950  | 0.487168  |
| 2      | 6      | 0      | -1.271376               | -0.062919 | 0.054293  |
| 3      | 6      | 0      | 1.282615                | -0.029881 | 0.048116  |
| 4      | 6      | 0      | 1.309596                | 1.513864  | -0.133804 |
| 5      | 6      | 0      | -0.076241               | 2.124778  | -0.371195 |
| 6      | 1      | 0      | -0.351059               | 2.032876  | -1.428392 |
| 7      | 1      | 0      | -0.800635               | 1.457769  | 1.538934  |

|    |   |   |           |           |           |
|----|---|---|-----------|-----------|-----------|
| 8  | 1 | 0 | 1.968995  | 1.773565  | -0.969393 |
| 9  | 1 | 0 | 1.754401  | 1.955229  | 0.766167  |
| 10 | 1 | 0 | -0.055880 | 3.194890  | -0.140171 |
| 11 | 1 | 0 | -2.090688 | 1.895595  | 0.424774  |
| 12 | 7 | 0 | 0.013761  | -0.514059 | -0.546650 |
| 13 | 6 | 0 | 2.423026  | -0.644142 | -0.769028 |
| 14 | 1 | 0 | 2.513734  | -1.718712 | -0.588214 |
| 15 | 1 | 0 | 2.255212  | -0.478712 | -1.839281 |
| 16 | 1 | 0 | 3.369959  | -0.168463 | -0.492792 |
| 17 | 6 | 0 | 1.481982  | -0.424973 | 1.519130  |
| 18 | 1 | 0 | 1.305277  | -1.497198 | 1.652751  |
| 19 | 1 | 0 | 2.513911  | -0.208975 | 1.819092  |
| 20 | 1 | 0 | 0.822850  | 0.128752  | 2.193261  |
| 21 | 6 | 0 | -2.308960 | -0.166379 | -1.068898 |
| 22 | 1 | 0 | -2.327181 | -1.185346 | -1.469746 |
| 23 | 1 | 0 | -3.310458 | 0.074044  | -0.695755 |
| 24 | 1 | 0 | -2.068361 | 0.520325  | -1.887638 |
| 25 | 6 | 0 | -1.756038 | -0.908810 | 1.238709  |
| 26 | 1 | 0 | -2.676423 | -0.464060 | 1.634432  |
| 27 | 1 | 0 | -1.976889 | -1.932518 | 0.927385  |
| 28 | 1 | 0 | -1.026226 | -0.943810 | 2.050594  |
| 29 | 8 | 0 | 0.012847  | -1.940176 | -0.529248 |
| 30 | 1 | 0 | 0.139110  | -2.172364 | -1.462424 |

-----

**TEMPOSCN**

Standard orientation:

-----

| Center | Atomic | Atomic | Coordinates (Angstroms) |   |   |
|--------|--------|--------|-------------------------|---|---|
| Number | Number | Type   | X                       | Y | Z |

-----

|    |    |   |           |           |           |
|----|----|---|-----------|-----------|-----------|
| 1  | 6  | 0 | 2.312163  | -1.031080 | -1.013858 |
| 2  | 6  | 0 | 1.113219  | -1.302853 | -0.091061 |
| 3  | 6  | 0 | 1.054124  | 1.349062  | -0.025595 |
| 4  | 6  | 0 | 2.595666  | 1.378565  | -0.243850 |
| 5  | 6  | 0 | 3.255123  | -0.000853 | -0.395814 |
| 6  | 1  | 0 | 3.578196  | -0.361080 | 0.587578  |
| 7  | 1  | 0 | 1.976599  | -0.713078 | -2.004102 |
| 8  | 1  | 0 | 3.048541  | 1.913320  | 0.594986  |
| 9  | 1  | 0 | 2.750072  | 1.979878  | -1.144399 |
| 10 | 1  | 0 | 4.155079  | 0.095175  | -1.007589 |
| 11 | 1  | 0 | 2.823026  | -1.989063 | -1.146882 |
| 12 | 7  | 0 | 0.739772  | 0.006315  | 0.590136  |
| 13 | 6  | 0 | 0.582959  | 2.423196  | 0.938115  |
| 14 | 1  | 0 | -0.503019 | 2.387387  | 1.055854  |
| 15 | 1  | 0 | 1.061174  | 2.325449  | 1.915915  |
| 16 | 1  | 0 | 0.864027  | 3.387886  | 0.508283  |
| 17 | 6  | 0 | 0.292878  | 1.463303  | -1.358741 |
| 18 | 1  | 0 | -0.770936 | 1.268474  | -1.224815 |
| 19 | 1  | 0 | 0.431704  | 2.498455  | -1.683259 |
| 20 | 1  | 0 | 0.694276  | 0.815739  | -2.137945 |
| 21 | 6  | 0 | 1.457057  | -2.295821 | 1.018493  |
| 22 | 1  | 0 | 0.599873  | -2.484357 | 1.666587  |
| 23 | 1  | 0 | 1.736329  | -3.233275 | 0.532183  |
| 24 | 1  | 0 | 2.299191  | -1.950018 | 1.624628  |
| 25 | 6  | 0 | -0.144122 | -1.768323 | -0.839782 |
| 26 | 1  | 0 | 0.128344  | -2.702785 | -1.339514 |
| 27 | 1  | 0 | -0.961408 | -1.958666 | -0.141777 |
| 28 | 1  | 0 | -0.478593 | -1.053148 | -1.592112 |
| 29 | 8  | 0 | 0.207558  | -0.040589 | 1.644932  |
| 30 | 16 | 0 | -4.594294 | 0.023852  | -0.329798 |



|    |   |   |           |           |          |
|----|---|---|-----------|-----------|----------|
| 31 | 6 | 0 | -3.111469 | -0.078841 | 0.164463 |
| 32 | 7 | 0 | -1.886889 | -0.163649 | 0.572645 |

-----

**TS-SCN**

Standard orientation:

-----

| Center<br>Number | Atomic<br>Number | Atomic<br>Type | Coordinates (Angstroms) |           |           |
|------------------|------------------|----------------|-------------------------|-----------|-----------|
|                  |                  |                | X                       | Y         | Z         |
| 1                | 6                | 0              | -3.822598               | 0.363801  | -1.571002 |
| 2                | 6                | 0              | -2.927644               | -0.847231 | -1.267039 |
| 3                | 6                | 0              | -2.794120               | 0.328176  | 1.081829  |
| 4                | 6                | 0              | -2.998952               | 1.712403  | 0.412186  |
| 5                | 6                | 0              | -3.176002               | 1.666772  | -1.113077 |
| 6                | 1                | 0              | -2.202024               | 1.773771  | -1.605561 |
| 7                | 1                | 0              | -4.800611               | 0.239170  | -1.093885 |
| 8                | 1                | 0              | -2.146568               | 2.354665  | 0.657973  |
| 9                | 1                | 0              | -3.880596               | 2.165175  | 0.878158  |
| 10               | 1                | 0              | -3.780405               | 2.518940  | -1.436966 |
| 11               | 1                | 0              | -3.999511               | 0.374670  | -2.651242 |
| 12               | 7                | 0              | -2.321214               | -0.659672 | 0.076419  |
| 13               | 6                | 0              | -1.767575               | 0.416116  | 2.207541  |
| 14               | 1                | 0              | -1.710218               | -0.525517 | 2.759830  |
| 15               | 1                | 0              | -0.772833               | 0.675212  | 1.828677  |
| 16               | 1                | 0              | -2.087491               | 1.210418  | 2.888654  |
| 17               | 6                | 0              | -4.110285               | -0.216214 | 1.670303  |
| 18               | 1                | 0              | -3.955244               | -1.228226 | 2.059256  |
| 19               | 1                | 0              | -4.416962               | 0.435037  | 2.495426  |
| 20               | 1                | 0              | -4.919602               | -0.236015 | 0.936612  |
| 21               | 6                | 0              | -1.793943               | -0.958701 | -2.294653 |

|    |   |   |           |           |           |
|----|---|---|-----------|-----------|-----------|
| 22 | 1 | 0 | -1.146890 | -1.813172 | -2.075020 |
| 23 | 1 | 0 | -2.238136 | -1.116904 | -3.281369 |
| 24 | 1 | 0 | -1.184365 | -0.050307 | -2.332976 |
| 25 | 6 | 0 | -3.734034 | -2.149757 | -1.256287 |
| 26 | 1 | 0 | -4.161095 | -2.315632 | -2.250592 |
| 27 | 1 | 0 | -3.088620 | -2.997096 | -1.006124 |
| 28 | 1 | 0 | -4.550393 | -2.098793 | -0.529988 |
| 29 | 8 | 0 | -1.422335 | -1.490785 | 0.417345  |
| 30 | 6 | 0 | 1.557036  | -2.472788 | -0.093082 |
| 31 | 6 | 0 | 1.046068  | -1.055326 | -0.197587 |
| 32 | 6 | 0 | 2.376765  | -0.645162 | 1.794533  |
| 33 | 6 | 0 | 1.627638  | -1.846728 | 2.366118  |
| 34 | 1 | 0 | 0.836666  | -0.682192 | -1.203474 |
| 35 | 1 | 0 | -0.264643 | -1.124437 | 0.127855  |
| 36 | 1 | 0 | 2.585704  | -2.457379 | -0.478068 |
| 37 | 1 | 0 | 3.398537  | -0.921767 | 1.502519  |
| 38 | 1 | 0 | 2.430991  | 0.162602  | 2.525348  |
| 39 | 1 | 0 | 0.619359  | -1.514775 | 2.636651  |
| 40 | 1 | 0 | 2.123758  | -2.166242 | 3.286394  |
| 41 | 1 | 0 | 0.972628  | -3.108779 | -0.762214 |
| 42 | 7 | 0 | 1.656129  | -0.142419 | 0.614541  |
| 43 | 6 | 0 | 1.529483  | 1.241407  | 0.382970  |
| 44 | 6 | 0 | 0.389373  | 1.744742  | -0.257129 |
| 45 | 6 | 0 | 2.542571  | 2.119374  | 0.786734  |
| 46 | 6 | 0 | 0.275271  | 3.106810  | -0.508017 |
| 47 | 1 | 0 | -0.424524 | 1.073403  | -0.520316 |
| 48 | 6 | 0 | 2.412137  | 3.481899  | 0.537139  |
| 49 | 1 | 0 | 3.437655  | 1.737386  | 1.266772  |
| 50 | 6 | 0 | 1.285111  | 3.983010  | -0.112197 |
| 51 | 1 | 0 | -0.619193 | 3.483319  | -0.996458 |

|    |    |   |          |           |           |
|----|----|---|----------|-----------|-----------|
| 52 | 1  | 0 | 3.206191 | 4.154231  | 0.847002  |
| 53 | 1  | 0 | 1.190083 | 5.047607  | -0.299687 |
| 54 | 6  | 0 | 1.543861 | -2.999274 | 1.355239  |
| 55 | 1  | 0 | 2.386966 | -3.683139 | 1.485723  |
| 56 | 1  | 0 | 0.628697 | -3.568856 | 1.539976  |
| 57 | 16 | 0 | 2.899690 | -0.824879 | -0.980933 |
| 58 | 6  | 0 | 4.443715 | -0.616936 | -1.571089 |
| 59 | 7  | 0 | 5.535525 | -0.456538 | -1.971433 |

-----

### A-SCN

Standard orientation:

-----

| Center<br>Number | Atomic<br>Number | Atomic<br>Type | Coordinates (Angstroms) |           |           |
|------------------|------------------|----------------|-------------------------|-----------|-----------|
|                  |                  |                | X                       | Y         | Z         |
| 1                | 6                | 0              | 2.330478                | -0.888236 | -0.836611 |
| 2                | 6                | 0              | 0.936723                | -0.399327 | -0.958636 |
| 3                | 6                | 0              | 0.539667                | -1.662236 | 1.011375  |
| 4                | 6                | 0              | 1.245829                | -2.861403 | 0.381352  |
| 5                | 6                | 0              | 2.356566                | -2.416518 | -0.590879 |
| 6                | 1                | 0              | 0.592075                | 0.223032  | -1.779539 |
| 7                | 1                | 0              | 2.241242                | -2.927190 | -1.549271 |
| 8                | 1                | 0              | 2.766353                | -0.378228 | 0.034680  |
| 9                | 1                | 0              | 1.214880                | -1.070727 | 1.636973  |
| 10               | 1                | 0              | -0.323744               | -1.950730 | 1.607442  |
| 11               | 1                | 0              | 0.496376                | -3.461410 | -0.143040 |
| 12               | 1                | 0              | 1.649733                | -3.473605 | 1.191040  |
| 13               | 1                | 0              | 3.344031                | -2.671225 | -0.200877 |
| 14               | 1                | 0              | 2.906031                | -0.601280 | -1.716271 |
| 15               | 7                | 0              | 0.075102                | -0.758495 | -0.067565 |

|    |    |   |           |           |           |
|----|----|---|-----------|-----------|-----------|
| 16 | 6  | 0 | -1.291215 | -0.305019 | -0.098931 |
| 17 | 6  | 0 | -2.316826 | -1.228005 | 0.093418  |
| 18 | 6  | 0 | -1.553478 | 1.041842  | -0.332881 |
| 19 | 6  | 0 | -3.634503 | -0.785414 | 0.043328  |
| 20 | 1  | 0 | -2.091413 | -2.277221 | 0.258344  |
| 21 | 6  | 0 | -2.877957 | 1.468500  | -0.380876 |
| 22 | 1  | 0 | -0.734113 | 1.743988  | -0.464185 |
| 23 | 6  | 0 | -3.916532 | 0.559763  | -0.191738 |
| 24 | 1  | 0 | -4.441461 | -1.497189 | 0.183508  |
| 25 | 1  | 0 | -3.093414 | 2.517400  | -0.556971 |
| 26 | 1  | 0 | -4.946891 | 0.899118  | -0.225574 |
| 27 | 16 | 0 | 2.011006  | 2.715919  | -0.395727 |
| 28 | 6  | 0 | 1.497628  | 1.962858  | 0.996920  |
| 29 | 7  | 0 | 1.117177  | 1.408457  | 1.959041  |

---

## IX. References

- (1) B. Xu, Y. Shang, X. Jie, X. Zhang, J. Kan, S. L. Yedage and W. Su, *Green Chem.*, 2020, **22**, 1827–1831.
- (2) (a) Y. He, F. Wang, X. Zhang and X. Fan, *Chem. Commun.*, 2017, **53**, 4002–4005; (b) F. Wang, Y. He, M. Tian, X. Zhang and X. Fan, *Org. Lett.*, 2018, **20**, 864–867.
- (3) M. J. Frisch, G. W. Trucks, H. B. Schlegel, G. E. Scuseria, M. A. Robb, J. R. Cheeseman, G. Scalmani, V. Barone, G. A. Petersson, H. Nakatsuji, X. Li, M. Caricato, A. V. Marenich, J. Bloino, B. G. Janesko, R. Gomperts, B. Mennucci, H. P. Hratchian, J. V. Ortiz, A. F. Izmaylov, J. L. Sonnenberg, Williams, F. Ding, F. Lipparini, F. Egidi, J. Goings, B. Peng, A. Petrone, T. Henderson, D. Ranasinghe, V. G. Zakrzewski, J. Gao, N. Rega, G. Zheng, W. Liang, M. Hada, M. Ehara, K. Toyota, R. Fukuda, J. Hasegawa, M. Ishida, T. Nakajima, Y. Honda, O. Kitao, H. Nakai, T. Vreven, K. Throssell, J. A. Montgomery Jr., J. E. Peralta, F. Ogliaro, M. J. Bearpark, J. J. Heyd, E. N. Brothers, K. N. Kudin, V. N. Staroverov, T. A. Keith, R. Kobayashi, J. Normand, K. Raghavachari, A. P. Rendell, J. C. Burant, S. S. Iyengar, J. Tomasi, M. Cossi, J. M. Millam, M. Klene, C. Adamo, R. Cammi, J. W. Ochterski, R. L. Martin, K. Morokuma, O. Farkas, J. B. Foresman and D. J. Fox, Gaussian 16 A. 03. Wallingford, CT, 2016.
- (4) S. Grimme, S. Ehrlich and L. Goerigk, *Comput. Chem.*, 2011, **32**, 1456–1465.
- (5) Y. Zhao and D. G. Truhlar, *Theor. Chem. Acc.*, 2008, **120**, 215–241.
- (6) M. Bursch, J.-M. Mewes, A. Hansen and S. Grimme, *Angew. Chem. Int. Ed.*, 2022, **61**, e202205735.
- (7) A. V. Marenich, C. J. Cramer and D. G. Truhlar, *J. Phys. Chem. B*, 2009, **113**, 6378–6396.
- (8) K. Fukui, *Acc. Chem. Res.*, 1981, **14**, 363–368.

(9) Semichem, Inc., GaussView 6.0.16 program: <http://gaussian.com/gaussview6/> (accessed on Nov 25, 2019).
